# Supplementary material
Source: publisher figshare collection journal article supplement (https://wiley.figshare.com/articles/dataset/_/3556467)
Supplement: Supplementary file 1 [file 1]

Diane M. Debinski, Jennet C. Caruthers, Dianne Cook, Jason Crowley, and Hadley Wickham. 2013. Gradient-based habitat affinities predict species vulnerability to drought. *Ecology*

## Appendix C: Single species model summary

In the following document, there are visual and numerical summaries of the model used to fit butterfly species count data by year. The species included in this document are limited to the ones that had an aggregate count of ten or higher over all years, regions and meadow types. Of the 87 total species, 60 met this criterion and are included in this document. Note that the models fit on the following pages are fit to the individual species, which is different than the mixed model fit to all the data.

To model this data, Poisson regression (a form of a Generalized linear model) was utilized, as it is natural to assume that the response variable (count) follows the Poisson distribution. The model used can be summarized as such:

$$\begin{aligned} \log_e(Y_{ijk}) = & \beta_0 + \beta_1(YEAR) + \alpha_i(REGION) + \gamma_j(MTYPE) + \alpha\gamma_{ij}(REGION * MTYPE) \\ & + \alpha\beta_{i1}(REGION * YEAR) + \gamma\beta_{j1}(MTYPE * YEAR) + \epsilon_{ijk} \end{aligned}$$

$i \in \{1, 2\}$ , representing  $REGION \in \{\text{Gallatin, Teton}\}$   
 $j \in \{1, \dots, 6\}$ , representing  $MTYPE \in \{\text{M1, M2, M3, M4, M5, M6}\}$  (C1)

In the model, year, region, and meadow type are the three explanatory variables. The year runs from 1997 to 2007, with some exceptions that are noted in the paper. There are two regions that butterflies were collected from in this study, the Gallatins and the Tetons, the latter of which is the baseline for the fitted models shown in this document. The third main effect included in this model is meadow type, which runs from M1 (hydric) to M6 (xeric). The M1 level is the baseline in the fitted model.

The model includes an interaction between region and meadow type, which allows the intercept of the regression line over year to differ between meadow types within a particular region (and vice versa). The model also includes an interaction between year/region and year/meadow type, which allows the slope of the regression line to differ among different regions and meadow types, respectively. For an example of a species where the slope of the regression over year clearly depends on region/meadow type, see *Speyeria mormonia*.

Once the model was fit to each species separately, it was determined which species' abundances showed the most significant trend over year, or between regions or meadow types. This was accomplished by considering two models for each species: the model shown above, and the model without any terms associated with year. A full vs. reduced F-test was then run to determine the difference in variation explained between the two models, and the p-value based on this test calculated. **The species are shown in order of significance, with the species showing most significant**

**trend, *Cercyonis oetus*, shown first.** The fitted model for each combination of region and meadow type is included, as well as estimated coefficients for the fitted model and some model diagnostics. Also included for each species is a plot of abundance over time, by region and meadow type, with the fitted model plotted over the data (in red).

## Table of Contents

|    |                                    |    |
|----|------------------------------------|----|
| 1  | <i>Cercyonis oetus</i>             | 6  |
| 2  | <i>Euchloe ausonides</i>           | 8  |
| 3  | <i>Glaucopsyche lygdamus</i>       | 10 |
| 4  | <i>Lycaena helloides</i>           | 12 |
| 5  | <i>Speyeria callippe</i>           | 14 |
| 6  | <i>Speyeria mormonia</i>           | 16 |
| 7  | <i>Plebejus saepiolus</i>          | 18 |
| 8  | <i>Coenonympha haydenii</i>        | 20 |
| 9  | <i>Lycaena editha</i>              | 22 |
| 10 | <i>Papilio zelicaon</i>            | 24 |
| 11 | <i>Lycaena heteronea</i>           | 26 |
| 12 | <i>Callophrys sheridanii</i>       | 28 |
| 13 | <i>Boloria kriemhild</i>           | 30 |
| 14 | <i>Speyeria egleis</i>             | 32 |
| 15 | <i>Plebejus shasta</i>             | 34 |
| 16 | <i>Euphilotes enoptes ancilla</i>  | 36 |
| 17 | <i>Speyeria zerene</i>             | 38 |
| 18 | <i>Phyciodes campestris</i>        | 40 |
| 19 | <i>Colias philodice</i>            | 42 |
| 20 | <i>Coenonympha tullia inornata</i> | 44 |
| 21 | <i>Euphydryas chalcedona</i>       | 46 |
| 22 | <i>Lycaeides melissa</i>           | 48 |
| 23 | <i>Plebejus icarioides</i>         | 50 |
| 24 | <i>Plebejus lupini</i>             | 52 |

|    |                                     |     |
|----|-------------------------------------|-----|
| 25 | <i>Speyeria atlantis hesperis</i>   | 54  |
| 26 | <i>Euphydryas editha</i>            | 56  |
| 27 | <i>Nymphalis antiopa</i>            | 58  |
| 28 | <i>Erebia epipsodea</i>             | 60  |
| 29 | <i>Agriades glandon</i>             | 62  |
| 30 | <i>Colias pelidne</i>               | 64  |
| 31 | <i>Colias gigantea</i>              | 66  |
| 32 | <i>Lycaeides idas</i>               | 68  |
| 33 | <i>Vanessa cardui</i>               | 70  |
| 34 | <i>Phyciodes selenis</i>            | 72  |
| 35 | <i>Lycaena hyllus</i>               | 74  |
| 36 | <i>Callophrys dumetorum</i>         | 76  |
| 37 | <i>Pontia beckerii</i>              | 78  |
| 38 | <i>Parnassius phoebus smintheus</i> | 80  |
| 39 | <i>Chlosyne palla</i>               | 82  |
| 40 | <i>Nymphalis milberti</i>           | 84  |
| 41 | <i>Anthocharis sara stella</i>      | 86  |
| 42 | <i>Boloria frigga</i>               | 88  |
| 43 | <i>Pontia protodice</i>             | 90  |
| 44 | <i>Glaucopsyche piasus</i>          | 92  |
| 45 | <i>Limenitis weidemeyerii</i>       | 94  |
| 46 | <i>Colias interior</i>              | 96  |
| 47 | <i>Papilio rutulus</i>              | 98  |
| 48 | <i>Oeneis chryxus chryxus</i>       | 100 |
| 49 | <i>Parnassius clodius</i>           | 102 |

|                                |     |
|--------------------------------|-----|
| 50 <i>Pieris napi</i> morph 1  | 104 |
| 51 <i>Lycaena cupreus</i>      | 106 |
| 52 <i>Pontia occidentalis</i>  | 108 |
| 53 <i>Speyeria cybele</i>      | 110 |
| 54 <i>Speyeria hydaspae</i>    | 112 |
| 55 <i>Euphydryas gillettii</i> | 114 |
| 56 <i>Colias christina</i>     | 116 |
| 57 <i>Pieris napi</i> morph 2  | 118 |
| 58 <i>Lycaena nivalis</i>      | 120 |
| 59 <i>Boloria selene</i>       | 122 |
| 60 <i>Phyciodes tharos</i>     | 124 |

# 1 Cercyonis oetus

Table C1: Poisson regression fitted models for *Cercyonis oetus*

|    | Region   | Meadow | Model                                  | Sig |
|----|----------|--------|----------------------------------------|-----|
| 1  | Teton    | M1     | $\hat{Y} = 0.03e^{0.638(YEAR-1997)}$   |     |
| 2  | Teton    | M2     | $\hat{Y} = 0.133e^{0.371(YEAR-1997)}$  |     |
| 3  | Teton    | M3     | $\hat{Y} = 6.088e^{0.091(YEAR-1997)}$  | *** |
| 5  | Teton    | M5     | $\hat{Y} = 19.934e^{0.041(YEAR-1997)}$ | *** |
| 6  | Teton    | M6     | $\hat{Y} = 12.559e^{0.035(YEAR-1997)}$ | *** |
| 7  | Gallatin | M1     | $\hat{Y} = 0.01e^{0.636(YEAR-1997)}$   | *** |
| 8  | Gallatin | M2     | $\hat{Y} = 0.22e^{0.369(YEAR-1997)}$   | *** |
| 9  | Gallatin | M3     | $\hat{Y} = 6.113e^{0.089(YEAR-1997)}$  | *** |
| 10 | Gallatin | M4     | $\hat{Y} = 4.099e^{0.13(YEAR-1997)}$   | *** |
| 11 | Gallatin | M5     | $\hat{Y} = 25.47e^{0.039(YEAR-1997)}$  | *** |
| 12 | Gallatin | M6     | $\hat{Y} = 37.507e^{0.033(YEAR-1997)}$ | *** |

Null deviance: 1442.29 on 80 degrees of freedom  
Residual deviance: 426.54 on 63 degrees of freedom  
(51 observations deleted due to missingness)  
AIC: 723.17

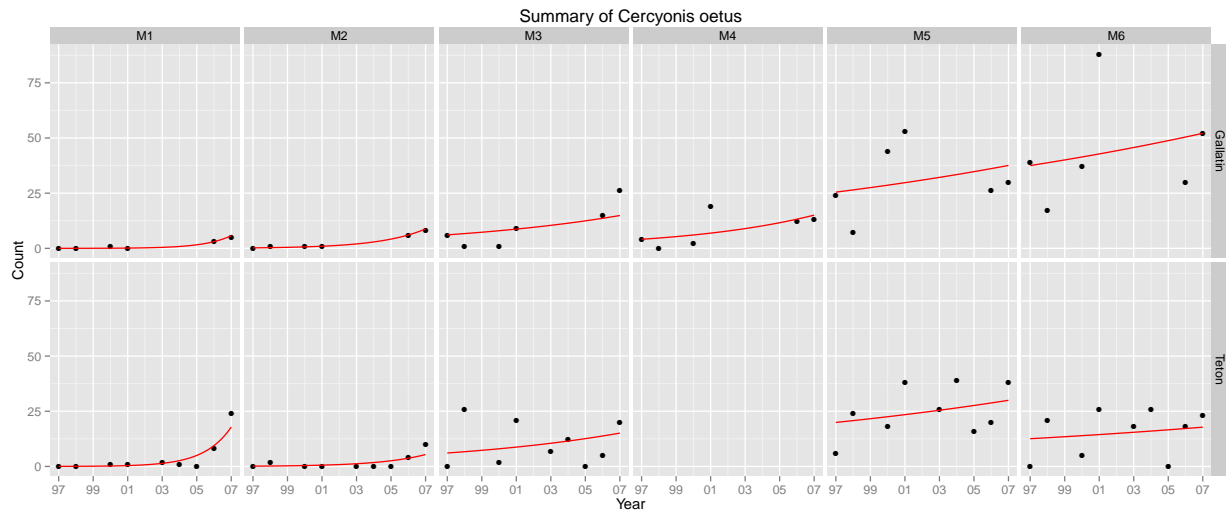

Figure C1: Time series plot of *Cercyonis oetus* by region and meadow type

# Cercyonis oetus

Table C2: Poisson regression parameter estimates for *Cercyonis oetus*

|                         | Estimate | Std. Error | z value | P-value |
|-------------------------|----------|------------|---------|---------|
| (Intercept)             | -3.4979  | 1.0171     | -3.44   | 0.0006  |
| Year                    | 0.6381   | 0.1117     | 5.71    | 0.0000  |
| MeadowM2                | 1.4772   | 1.2320     | 1.20    | 0.2305  |
| MeadowM3                | 5.3041   | 1.0336     | 5.13    | 0.0000  |
| MeadowM4                | 6.0248   | 1.1566     | 5.21    | 0.0000  |
| MeadowM5                | 6.4903   | 1.0228     | 6.35    | 0.0000  |
| MeadowM6                | 6.0283   | 1.0249     | 5.88    | 0.0000  |
| RegionGallatin          | -1.1163  | 0.4156     | -2.69   | 0.0072  |
| Year:MeadowM2           | -0.2675  | 0.1368     | -1.96   | 0.0505  |
| Year:MeadowM3           | -0.5472  | 0.1143     | -4.79   | 0.0000  |
| Year:MeadowM4           | -0.5060  | 0.1190     | -4.25   | 0.0000  |
| Year:MeadowM5           | -0.5973  | 0.1128     | -5.30   | 0.0000  |
| Year:MeadowM6           | -0.6033  | 0.1130     | -5.34   | 0.0000  |
| Year:RegionGallatin     | -0.0019  | 0.0188     | -0.10   | 0.9188  |
| MeadowM2:RegionGallatin | 1.6216   | 0.5145     | 3.15    | 0.0016  |
| MeadowM3:RegionGallatin | 1.1205   | 0.4166     | 2.69    | 0.0071  |
| MeadowM5:RegionGallatin | 1.3614   | 0.3962     | 3.44    | 0.0006  |
| MeadowM6:RegionGallatin | 2.2104   | 0.3975     | 5.56    | 0.0000  |

## 2 Euchloe ausonides

Table C3: Poisson regression fitted models for Euchloe ausonides

|    | Region   | Meadow | Model                                   | Sig |
|----|----------|--------|-----------------------------------------|-----|
| 1  | Teton    | M1     | $\hat{Y} = 0.15e^{-0.061(YEAR-1997)}$   |     |
| 2  | Teton    | M2     | $\hat{Y} = 1.53e^{0.048(YEAR-1997)}$    | *** |
| 3  | Teton    | M3     | $\hat{Y} = 6.048e^{-0.157(YEAR-1997)}$  | *** |
| 5  | Teton    | M5     | $\hat{Y} = 2.998e^{-0.25(YEAR-1997)}$   | *** |
| 6  | Teton    | M6     | $\hat{Y} = 13.953e^{-0.642(YEAR-1997)}$ | *** |
| 7  | Gallatin | M1     | $\hat{Y} = 3.988e^{-0.106(YEAR-1997)}$  | *** |
| 8  | Gallatin | M2     | $\hat{Y} = 5.44e^{0.002(YEAR-1997)}$    | *** |
| 9  | Gallatin | M3     | $\hat{Y} = 13.885e^{-0.203(YEAR-1997)}$ | *** |
| 10 | Gallatin | M4     | $\hat{Y} = 5.32e^{-0.166(YEAR-1997)}$   | *** |
| 11 | Gallatin | M5     | $\hat{Y} = 3.87e^{-0.296(YEAR-1997)}$   | *** |
| 12 | Gallatin | M6     | $\hat{Y} = 3.535e^{-0.687(YEAR-1997)}$  | *** |

Null deviance: 341.05 on 80 degrees of freedom

Residual deviance: 125.30 on 63 degrees of freedom

(51 observations deleted due to missingness)

AIC: 317.67

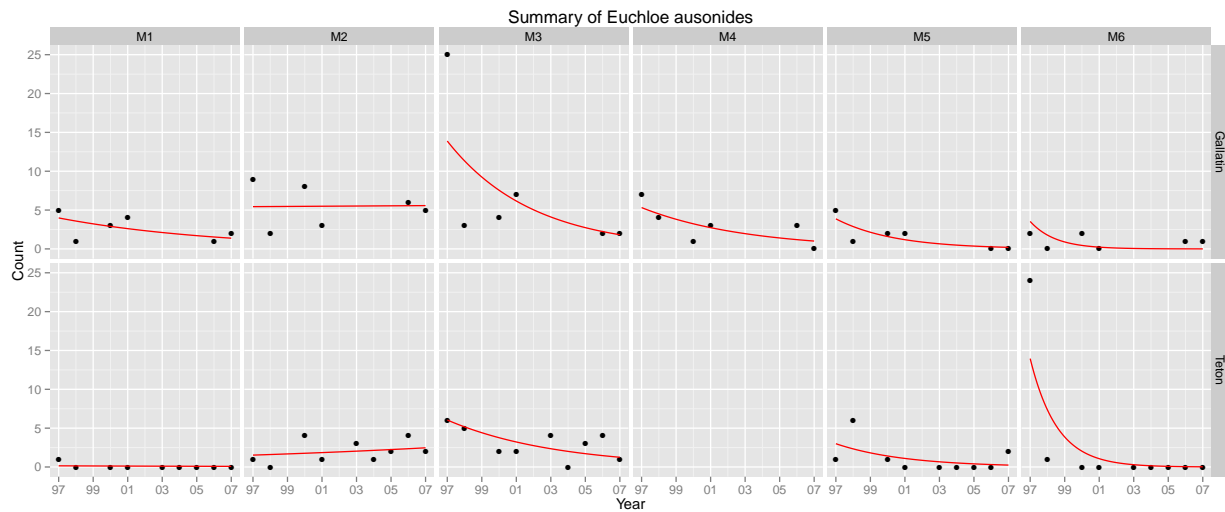

Figure C2: Time series plot of Euchloe ausonides by region and meadow type



# Euchloe ausonides

Table C4: Poisson regression parameter estimates for *Euchloe ausonides*

|                         | Estimate | Std. Error | z value | P-value |
|-------------------------|----------|------------|---------|---------|
| (Intercept)             | -1.8946  | 1.0831     | -1.75   | 0.0803  |
| Year                    | -0.0606  | 0.0894     | -0.68   | 0.4980  |
| MeadowM2                | 2.3198   | 1.1060     | 2.10    | 0.0360  |
| MeadowM3                | 3.6943   | 1.0919     | 3.38    | 0.0007  |
| MeadowM4                | 0.2883   | 0.4611     | 0.63    | 0.5319  |
| MeadowM5                | 2.9924   | 1.1422     | 2.62    | 0.0088  |
| MeadowM6                | 4.5303   | 1.1058     | 4.10    | 0.0000  |
| RegionGallatin          | 3.2778   | 1.0663     | 3.07    | 0.0021  |
| Year:MeadowM2           | 0.1085   | 0.0838     | 1.29    | 0.1954  |
| Year:MeadowM3           | -0.0969  | 0.0866     | -1.12   | 0.2635  |
| Year:MeadowM4           | -0.0600  | 0.1082     | -0.55   | 0.5792  |
| Year:MeadowM5           | -0.1897  | 0.1174     | -1.62   | 0.1060  |
| Year:MeadowM6           | -0.5814  | 0.1545     | -3.76   | 0.0002  |
| Year:RegionGallatin     | -0.0454  | 0.0547     | -0.83   | 0.4065  |
| MeadowM2:RegionGallatin | -2.0093  | 1.0796     | -1.86   | 0.0627  |
| MeadowM3:RegionGallatin | -2.4467  | 1.0702     | -2.29   | 0.0222  |
| MeadowM5:RegionGallatin | -3.0223  | 1.1407     | -2.65   | 0.0081  |
| MeadowM6:RegionGallatin | -4.6506  | 1.1516     | -4.04   | 0.0001  |

### 3 Glaucopsyche lygdamus

Table C5: Poisson regression fitted models for *Glaucopsyche lygdamus*

|    | Region   | Meadow | Model                                   | Sig |
|----|----------|--------|-----------------------------------------|-----|
| 1  | Teton    | M1     | $\hat{Y} = 0.975e^{0.041(YEAR-1997)}$   |     |
| 2  | Teton    | M2     | $\hat{Y} = 2.437e^{-0.311(YEAR-1997)}$  | *** |
| 3  | Teton    | M3     | $\hat{Y} = 23.317e^{-0.355(YEAR-1997)}$ | *** |
| 5  | Teton    | M5     | $\hat{Y} = 2.604e^{-0.202(YEAR-1997)}$  | *** |
| 6  | Teton    | M6     | $\hat{Y} = 3.015e^{-0.191(YEAR-1997)}$  | *** |
| 7  | Gallatin | M1     | $\hat{Y} = 8.639e^{-0.183(YEAR-1997)}$  | *** |
| 8  | Gallatin | M2     | $\hat{Y} = 34.424e^{-0.535(YEAR-1997)}$ | *** |
| 9  | Gallatin | M3     | $\hat{Y} = 11.394e^{-0.579(YEAR-1997)}$ | *** |
| 10 | Gallatin | M4     | $\hat{Y} = 22.143e^{-0.419(YEAR-1997)}$ | *** |
| 11 | Gallatin | M5     | $\hat{Y} = 16.29e^{-0.426(YEAR-1997)}$  | *** |
| 12 | Gallatin | M6     | $\hat{Y} = 8.266e^{-0.415(YEAR-1997)}$  | *** |

Null deviance: 807.91 on 80 degrees of freedom

Residual deviance: 302.55 on 63 degrees of freedom

(51 observations deleted due to missingness)

AIC: 482.75

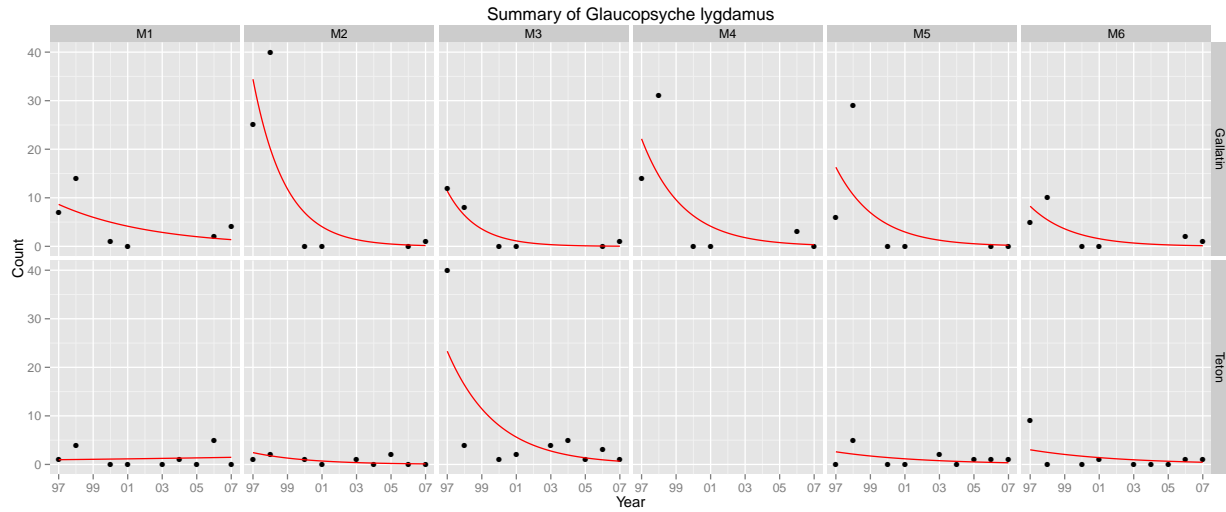

Figure C3: Time series plot of *Glaucopsyche lygdamus* by region and meadow type

# Glaucopsyche lygdamus

Table C6: Poisson regression parameter estimates for Glaucopsyche lygdamus

|                         | Estimate | Std. Error | z value | P-value |
|-------------------------|----------|------------|---------|---------|
| (Intercept)             | -0.0253  | 0.5004     | -0.05   | 0.9597  |
| Year                    | 0.0407   | 0.0691     | 0.59    | 0.5564  |
| MeadowM2                | 0.9161   | 0.6159     | 1.49    | 0.1369  |
| MeadowM3                | 3.1745   | 0.5202     | 6.10    | 0.0000  |
| MeadowM4                | 0.9412   | 0.2941     | 3.20    | 0.0014  |
| MeadowM5                | 0.9824   | 0.5991     | 1.64    | 0.1010  |
| MeadowM6                | 1.1290   | 0.6052     | 1.87    | 0.0621  |
| RegionGallatin          | 2.1816   | 0.5021     | 4.34    | 0.0000  |
| Year:MeadowM2           | -0.3515  | 0.0922     | -3.81   | 0.0001  |
| Year:MeadowM3           | -0.3960  | 0.0823     | -4.81   | 0.0000  |
| Year:MeadowM4           | -0.2355  | 0.1020     | -2.31   | 0.0210  |
| Year:MeadowM5           | -0.2429  | 0.0900     | -2.70   | 0.0069  |
| Year:MeadowM6           | -0.2317  | 0.0962     | -2.41   | 0.0160  |
| Year:RegionGallatin     | -0.2241  | 0.0657     | -3.41   | 0.0006  |
| MeadowM2:RegionGallatin | 0.4663   | 0.5999     | 0.78    | 0.4369  |
| MeadowM3:RegionGallatin | -2.8977  | 0.5341     | -5.43   | 0.0000  |
| MeadowM5:RegionGallatin | -0.3482  | 0.5773     | -0.60   | 0.5464  |
| MeadowM6:RegionGallatin | -1.1732  | 0.5964     | -1.97   | 0.0492  |

## 4 Lycaena helloides

Table C7: Poisson regression fitted models for Lycaena helloides

|    | Region   | Meadow | Model                                   | Sig |
|----|----------|--------|-----------------------------------------|-----|
| 1  | Teton    | M1     | $\hat{Y} = 7.297e^{-0.05(YEAR-1997)}$   |     |
| 2  | Teton    | M2     | $\hat{Y} = 2.871e^{0.129(YEAR-1997)}$   | *** |
| 3  | Teton    | M3     | $\hat{Y} = 19.685e^{-0.113(YEAR-1997)}$ | *** |
| 5  | Teton    | M5     | $\hat{Y} = 11.004e^{-0.268(YEAR-1997)}$ | *** |
| 6  | Teton    | M6     | $\hat{Y} = 0.296e^{0.107(YEAR-1997)}$   | *** |
| 7  | Gallatin | M1     | $\hat{Y} = 4.448e^{0.162(YEAR-1997)}$   | *** |
| 8  | Gallatin | M2     | $\hat{Y} = 1.647e^{0.341(YEAR-1997)}$   | *** |
| 9  | Gallatin | M3     | $\hat{Y} = 16.531e^{0.099(YEAR-1997)}$  | *** |
| 10 | Gallatin | M4     | $\hat{Y} = 15.568e^{0.045(YEAR-1997)}$  | *** |
| 11 | Gallatin | M5     | $\hat{Y} = 5.462e^{-0.056(YEAR-1997)}$  | *** |
| 12 | Gallatin | M6     | $\hat{Y} = 0.178e^{0.319(YEAR-1997)}$   | *** |

Null deviance: 1145.24 on 80 degrees of freedom  
Residual deviance: 413.44 on 63 degrees of freedom  
(51 observations deleted due to missingness)  
AIC: 685.83

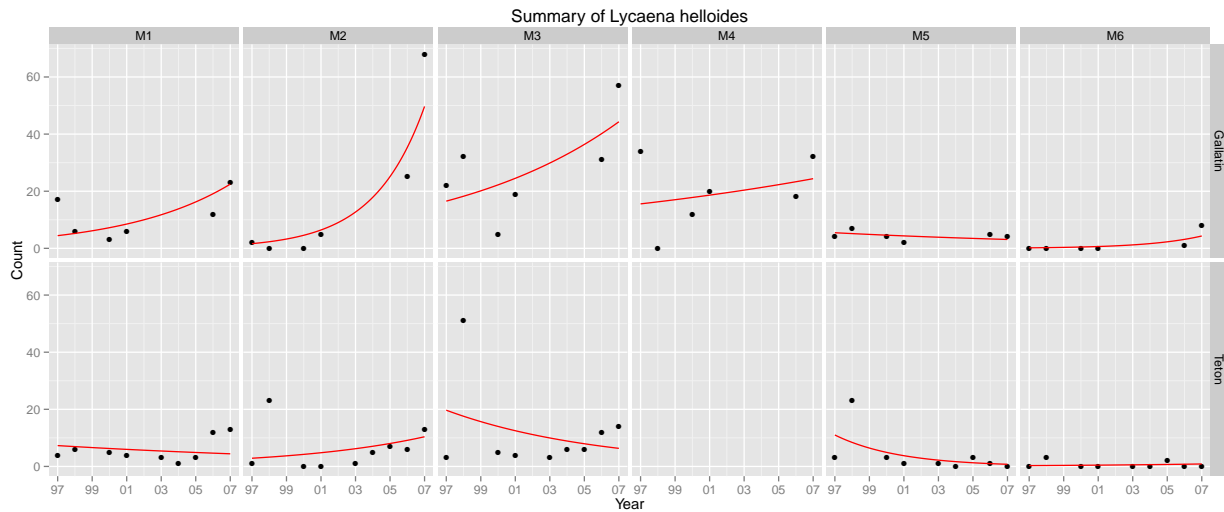

Figure C4: Time series plot of Lycaena helloides by region and meadow type

# Lycaena helloides

Table C8: Poisson regression parameter estimates for Lycaena helloides

|                         | Estimate | Std. Error | z value | P-value |
|-------------------------|----------|------------|---------|---------|
| (Intercept)             | 1.9875   | 0.2012     | 9.88    | 0.0000  |
| Year                    | -0.0501  | 0.0303     | -1.65   | 0.0985  |
| MeadowM2                | -0.9329  | 0.3036     | -3.07   | 0.0021  |
| MeadowM3                | 0.9923   | 0.2226     | 4.46    | 0.0000  |
| MeadowM4                | 1.2528   | 0.2753     | 4.55    | 0.0000  |
| MeadowM5                | 0.4107   | 0.2757     | 1.49    | 0.1363  |
| MeadowM6                | -3.2055  | 0.7796     | -4.11   | 0.0000  |
| RegionGallatin          | -0.4952  | 0.2391     | -2.07   | 0.0384  |
| Year:MeadowM2           | 0.1787   | 0.0395     | 4.52    | 0.0000  |
| Year:MeadowM3           | -0.0634  | 0.0312     | -2.03   | 0.0422  |
| Year:MeadowM4           | -0.1171  | 0.0370     | -3.16   | 0.0016  |
| Year:MeadowM5           | -0.2183  | 0.0482     | -4.53   | 0.0000  |
| Year:MeadowM6           | 0.1568   | 0.0982     | 1.60    | 0.1104  |
| Year:RegionGallatin     | 0.2121   | 0.0251     | 8.44    | 0.0000  |
| MeadowM2:RegionGallatin | -0.0607  | 0.2661     | -0.23   | 0.8196  |
| MeadowM3:RegionGallatin | 0.3205   | 0.2337     | 1.37    | 0.1703  |
| MeadowM5:RegionGallatin | -0.2053  | 0.3326     | -0.62   | 0.5371  |
| MeadowM6:RegionGallatin | -0.0101  | 0.6207     | -0.02   | 0.9870  |

## 5 Speyeria callippe

Table C9: Poisson regression fitted models for *Speyeria callippe*

|    | Region   | Meadow | Model                                 | Sig |
|----|----------|--------|---------------------------------------|-----|
| 1  | Teton    | M1     | $\hat{Y} = 0e^{1.701(YEAR-1997)}$     |     |
| 2  | Teton    | M2     | $\hat{Y} = 0.014e^{0.302(YEAR-1997)}$ |     |
| 3  | Teton    | M3     | $\hat{Y} = 2.489e^{0.152(YEAR-1997)}$ |     |
| 5  | Teton    | M5     | $\hat{Y} = 0.243e^{0.414(YEAR-1997)}$ |     |
| 6  | Teton    | M6     | $\hat{Y} = 0.782e^{0.194(YEAR-1997)}$ |     |
| 7  | Gallatin | M1     | $\hat{Y} = 0e^{2.091(YEAR-1997)}$     | *** |
| 8  | Gallatin | M2     | $\hat{Y} = 0.001e^{0.692(YEAR-1997)}$ | *** |
| 9  | Gallatin | M3     | $\hat{Y} = 0.032e^{0.543(YEAR-1997)}$ | *** |
| 10 | Gallatin | M4     | $\hat{Y} = 0e^{1.793(YEAR-1997)}$     | *** |
| 11 | Gallatin | M5     | $\hat{Y} = 0.002e^{0.804(YEAR-1997)}$ | *** |
| 12 | Gallatin | M6     | $\hat{Y} = 0.014e^{0.584(YEAR-1997)}$ | *** |

Null deviance: 390.53 on 80 degrees of freedom  
Residual deviance: 73.58 on 63 degrees of freedom  
(51 observations deleted due to missingness)  
AIC: 213.51

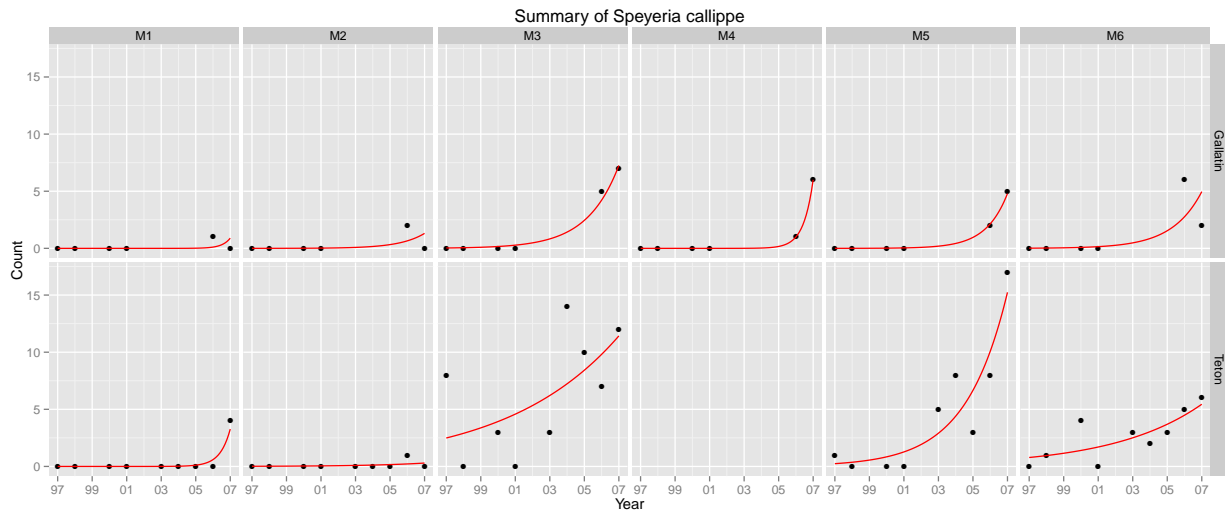

Figure C5: Time series plot of *Speyeria callippe* by region and meadow type

# Speyeria callippe

Table C10: Poisson regression parameter estimates for *Speyeria callippe*

|                         | Estimate | Std. Error | z value | P-value |
|-------------------------|----------|------------|---------|---------|
| (Intercept)             | -15.8229 | 9.0326     | -1.75   | 0.0798  |
| Year                    | 1.7008   | 0.9224     | 1.84    | 0.0652  |
| MeadowM2                | 11.5862  | 9.5489     | 1.21    | 0.2250  |
| MeadowM3                | 16.7346  | 9.0381     | 1.85    | 0.0641  |
| MeadowM4                | 4.8913   | 14.1096    | 0.35    | 0.7288  |
| MeadowM5                | 14.4063  | 9.0580     | 1.59    | 0.1117  |
| MeadowM6                | 15.5772  | 9.0488     | 1.72    | 0.0852  |
| RegionGallatin          | -5.2046  | 1.9086     | -2.73   | 0.0064  |
| Year:MeadowM2           | -1.3992  | 0.9946     | -1.41   | 0.1595  |
| Year:MeadowM3           | -1.5484  | 0.9234     | -1.68   | 0.0936  |
| Year:MeadowM4           | -0.2983  | 1.4253     | -0.21   | 0.8342  |
| Year:MeadowM5           | -1.2867  | 0.9257     | -1.39   | 0.1645  |
| Year:MeadowM6           | -1.5068  | 0.9251     | -1.63   | 0.1034  |
| Year:RegionGallatin     | 0.3903   | 0.1562     | 2.50    | 0.0125  |
| MeadowM2:RegionGallatin | 2.7922   | 1.7771     | 1.57    | 0.1161  |
| MeadowM3:RegionGallatin | 0.8472   | 1.1765     | 0.72    | 0.4715  |
| MeadowM5:RegionGallatin | 0.1450   | 1.1996     | 0.12    | 0.9038  |
| MeadowM6:RegionGallatin | 1.2086   | 1.2091     | 1.00    | 0.3175  |

## 6 Speyeria mormonia

Table C11: Poisson regression fitted models for *Speyeria mormonia*

|    | Region   | Meadow | Model                                   | Sig |
|----|----------|--------|-----------------------------------------|-----|
| 1  | Teton    | M1     | $\hat{Y} = 2.393e^{-0.035(YEAR-1997)}$  |     |
| 2  | Teton    | M2     | $\hat{Y} = 6.501e^{0.172(YEAR-1997)}$   | *** |
| 3  | Teton    | M3     | $\hat{Y} = 39.583e^{-0.051(YEAR-1997)}$ | *** |
| 5  | Teton    | M5     | $\hat{Y} = 30.329e^{-0.117(YEAR-1997)}$ | *** |
| 6  | Teton    | M6     | $\hat{Y} = 1.555e^{-0.092(YEAR-1997)}$  |     |
| 7  | Gallatin | M1     | $\hat{Y} = 4.695e^{0.167(YEAR-1997)}$   | *** |
| 8  | Gallatin | M2     | $\hat{Y} = 1.418e^{0.373(YEAR-1997)}$   | *** |
| 9  | Gallatin | M3     | $\hat{Y} = 13.079e^{0.15(YEAR-1997)}$   | *** |
| 10 | Gallatin | M4     | $\hat{Y} = 14.389e^{0.125(YEAR-1997)}$  | *** |
| 11 | Gallatin | M5     | $\hat{Y} = 18.911e^{0.085(YEAR-1997)}$  | *** |
| 12 | Gallatin | M6     | $\hat{Y} = 15.072e^{0.11(YEAR-1997)}$   | *** |

Null deviance: 1365.73 on 80 degrees of freedom  
Residual deviance: 288.49 on 63 degrees of freedom  
(51 observations deleted due to missingness)  
AIC: 652.57

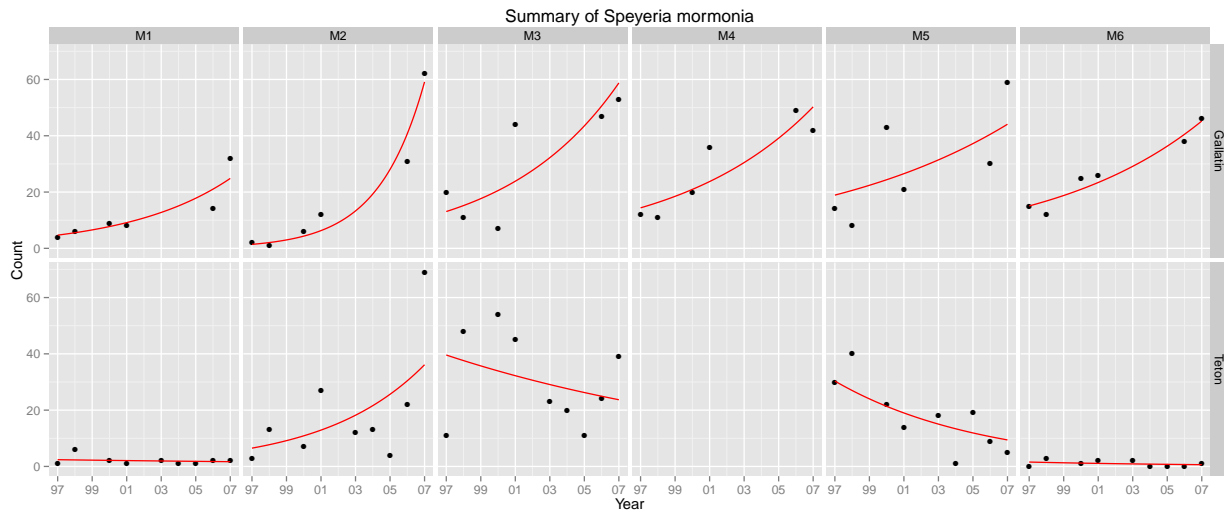

Figure C6: Time series plot of *Speyeria mormonia* by region and meadow type



# Speyeria mormonia

Table C12: Poisson regression parameter estimates for *Speyeria mormonia*

|                         | Estimate | Std. Error | z value | P-value |
|-------------------------|----------|------------|---------|---------|
| (Intercept)             | 0.8727   | 0.2867     | 3.04    | 0.0023  |
| Year                    | -0.0350  | 0.0330     | -1.06   | 0.2901  |
| MeadowM2                | 0.9992   | 0.3296     | 3.03    | 0.0024  |
| MeadowM3                | 2.8057   | 0.2930     | 9.58    | 0.0000  |
| MeadowM4                | 1.1199   | 0.2797     | 4.00    | 0.0001  |
| MeadowM5                | 2.5394   | 0.2964     | 8.57    | 0.0000  |
| MeadowM6                | -0.4311  | 0.4422     | -0.97   | 0.3297  |
| RegionGallatin          | 0.6738   | 0.2857     | 2.36    | 0.0183  |
| Year:MeadowM2           | 0.2065   | 0.0382     | 5.40    | 0.0000  |
| Year:MeadowM3           | -0.0163  | 0.0332     | -0.49   | 0.6221  |
| Year:MeadowM4           | -0.0415  | 0.0361     | -1.15   | 0.2497  |
| Year:MeadowM5           | -0.0820  | 0.0335     | -2.45   | 0.0144  |
| Year:MeadowM6           | -0.0567  | 0.0359     | -1.58   | 0.1143  |
| Year:RegionGallatin     | 0.2016   | 0.0180     | 11.20   | 0.0000  |
| MeadowM2:RegionGallatin | -2.1966  | 0.3025     | -7.26   | 0.0000  |
| MeadowM3:RegionGallatin | -1.7812  | 0.2872     | -6.20   | 0.0000  |
| MeadowM5:RegionGallatin | -1.1462  | 0.2923     | -3.92   | 0.0001  |
| MeadowM6:RegionGallatin | 1.5974   | 0.4376     | 3.65    | 0.0003  |

## 7 Plebejus saepiolus

Table C13: Poisson regression fitted models for *Plebejus saepiolus*

|    | Region   | Meadow | Model                                   | Sig |
|----|----------|--------|-----------------------------------------|-----|
| 1  | Teton    | M1     | $\hat{Y} = 21.732e^{0.011(YEAR-1997)}$  |     |
| 2  | Teton    | M2     | $\hat{Y} = 56.38e^{-0.05(YEAR-1997)}$   | *** |
| 3  | Teton    | M3     | $\hat{Y} = 15.834e^{0.072(YEAR-1997)}$  | *** |
| 5  | Teton    | M5     | $\hat{Y} = 1.607e^{0.106(YEAR-1997)}$   | *** |
| 6  | Teton    | M6     | $\hat{Y} = 0.86e^{0.046(YEAR-1997)}$    | *** |
| 7  | Gallatin | M1     | $\hat{Y} = 28.379e^{-0.114(YEAR-1997)}$ | *** |
| 8  | Gallatin | M2     | $\hat{Y} = 38.157e^{-0.176(YEAR-1997)}$ | *** |
| 9  | Gallatin | M3     | $\hat{Y} = 4.371e^{-0.054(YEAR-1997)}$  | *** |
| 10 | Gallatin | M4     | $\hat{Y} = 5.948e^{0.002(YEAR-1997)}$   | *** |
| 11 | Gallatin | M5     | $\hat{Y} = 6.723e^{-0.02(YEAR-1997)}$   | *** |
| 12 | Gallatin | M6     | $\hat{Y} = 7.999e^{-0.08(YEAR-1997)}$   | *** |

Null deviance: 1432.23 on 80 degrees of freedom  
Residual deviance: 396.23 on 63 degrees of freedom  
(51 observations deleted due to missingness)  
AIC: 727.96

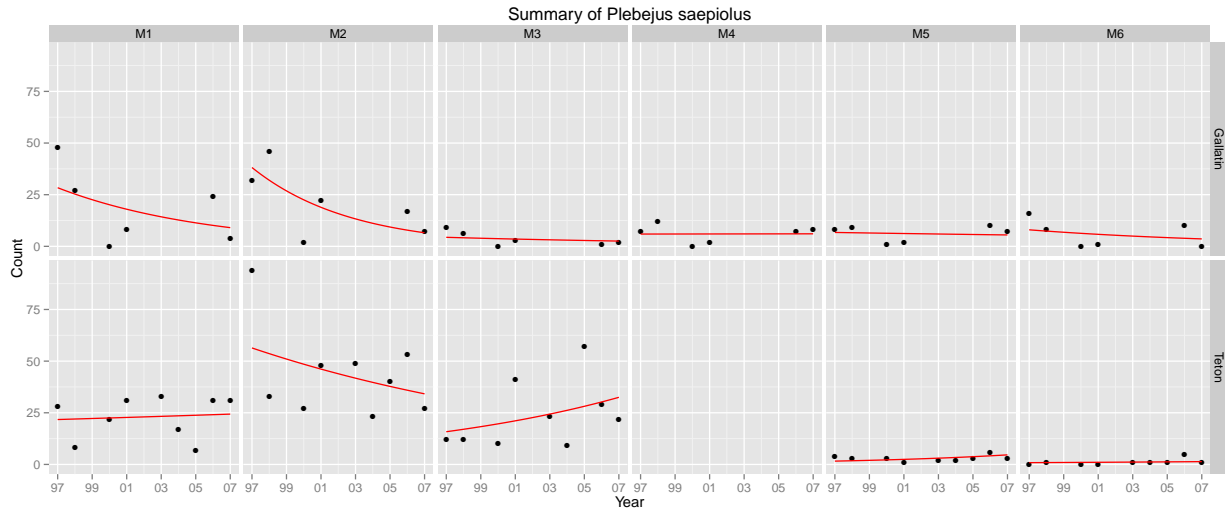

Figure C7: Time series plot of *Plebejus saepiolus* by region and meadow type

# Plebejus saepiolus

Table C14: Poisson regression parameter estimates for *Plebejus saepiolus*

|                         | Estimate | Std. Error | z value | P-value |
|-------------------------|----------|------------|---------|---------|
| (Intercept)             | 3.0788   | 0.1225     | 25.13   | 0.0000  |
| Year                    | 0.0114   | 0.0185     | 0.62    | 0.5377  |
| MeadowM2                | 0.9533   | 0.1431     | 6.66    | 0.0000  |
| MeadowM3                | -0.3166  | 0.1841     | -1.72   | 0.0854  |
| MeadowM4                | -1.5627  | 0.2850     | -5.48   | 0.0000  |
| MeadowM5                | -2.6047  | 0.3274     | -7.96   | 0.0000  |
| MeadowM6                | -3.2299  | 0.4267     | -7.57   | 0.0000  |
| RegionGallatin          | 0.2669   | 0.1501     | 1.78    | 0.0754  |
| Year:MeadowM2           | -0.0615  | 0.0219     | -2.81   | 0.0050  |
| Year:MeadowM3           | 0.0605   | 0.0268     | 2.25    | 0.0243  |
| Year:MeadowM4           | 0.1162   | 0.0494     | 2.35    | 0.0185  |
| Year:MeadowM5           | 0.0945   | 0.0405     | 2.33    | 0.0197  |
| Year:MeadowM6           | 0.0345   | 0.0479     | 0.72    | 0.4714  |
| Year:RegionGallatin     | -0.1257  | 0.0217     | -5.80   | 0.0000  |
| MeadowM2:RegionGallatin | -0.6573  | 0.1654     | -3.98   | 0.0001  |
| MeadowM3:RegionGallatin | -1.5541  | 0.2645     | -5.87   | 0.0000  |
| MeadowM5:RegionGallatin | 1.1646   | 0.2958     | 3.94    | 0.0001  |
| MeadowM6:RegionGallatin | 1.9635   | 0.3949     | 4.97    | 0.0000  |

## 8 Coenonympha haydenii

Table C15: Poisson regression fitted models for Coenonympha haydenii

|    | Region   | Meadow | Model                                   | Sig |
|----|----------|--------|-----------------------------------------|-----|
| 1  | Teton    | M1     | $\hat{Y} = 7.637e^{0.023(YEAR-1997)}$   |     |
| 2  | Teton    | M2     | $\hat{Y} = 13.344e^{0.089(YEAR-1997)}$  | *** |
| 3  | Teton    | M3     | $\hat{Y} = 22.183e^{0.027(YEAR-1997)}$  | *** |
| 5  | Teton    | M5     | $\hat{Y} = 25.881e^{-0.032(YEAR-1997)}$ | *** |
| 6  | Teton    | M6     | $\hat{Y} = 0.68e^{-0.004(YEAR-1997)}$   | *** |
| 7  | Gallatin | M1     | $\hat{Y} = 40.857e^{-0.045(YEAR-1997)}$ | *** |
| 8  | Gallatin | M2     | $\hat{Y} = 39.261e^{0.02(YEAR-1997)}$   | *** |
| 9  | Gallatin | M3     | $\hat{Y} = 86.317e^{-0.041(YEAR-1997)}$ | *** |
| 10 | Gallatin | M4     | $\hat{Y} = 73.108e^{-0.047(YEAR-1997)}$ | *** |
| 11 | Gallatin | M5     | $\hat{Y} = 39.326e^{-0.1(YEAR-1997)}$   | *** |
| 12 | Gallatin | M6     | $\hat{Y} = 35.356e^{-0.072(YEAR-1997)}$ | *** |

Null deviance: 1725.48 on 80 degrees of freedom  
Residual deviance: 497.66 on 63 degrees of freedom  
(51 observations deleted due to missingness)  
AIC: 899.28

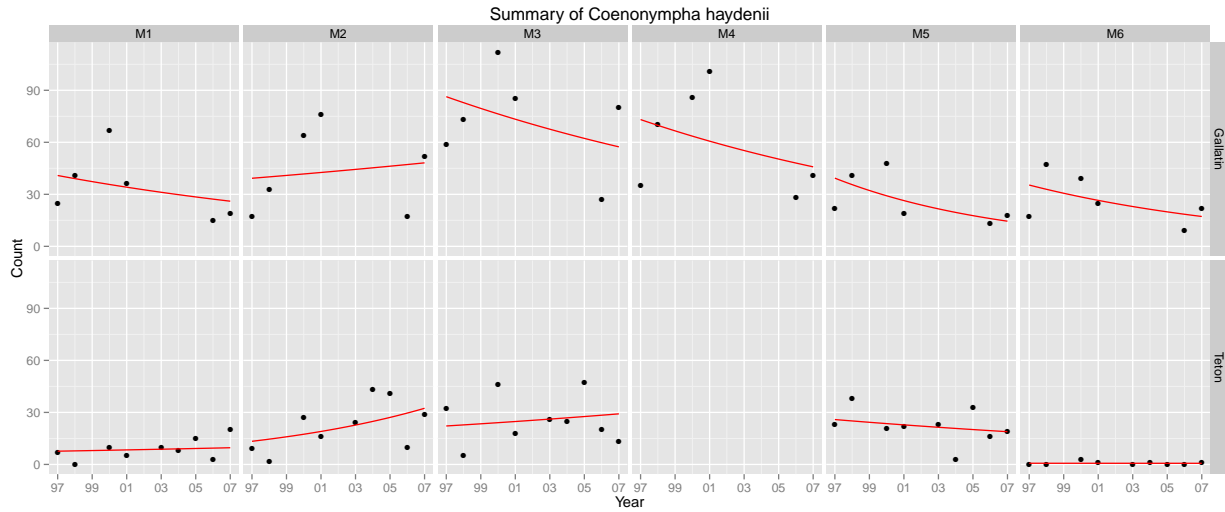

Figure C8: Time series plot of Coenonympha haydenii by region and meadow type

# Coenonympha haydenii

Table C16: Poisson regression parameter estimates for Coenonympha haydenii

|                         | Estimate | Std. Error | z value | P-value |
|-------------------------|----------|------------|---------|---------|
| (Intercept)             | 2.0330   | 0.1597     | 12.73   | 0.0000  |
| Year                    | 0.0232   | 0.0202     | 1.15    | 0.2503  |
| MeadowM2                | 0.5581   | 0.1831     | 3.05    | 0.0023  |
| MeadowM3                | 1.0664   | 0.1729     | 6.17    | 0.0000  |
| MeadowM4                | 0.5819   | 0.1239     | 4.70    | 0.0000  |
| MeadowM5                | 1.2206   | 0.1838     | 6.64    | 0.0000  |
| MeadowM6                | -2.4188  | 0.4500     | -5.38   | 0.0000  |
| RegionGallatin          | 1.6771   | 0.1556     | 10.78   | 0.0000  |
| Year:MeadowM2           | 0.0655   | 0.0215     | 3.05    | 0.0023  |
| Year:MeadowM3           | 0.0042   | 0.0202     | 0.21    | 0.8343  |
| Year:MeadowM4           | -0.0016  | 0.0226     | -0.07   | 0.9436  |
| Year:MeadowM5           | -0.0547  | 0.0235     | -2.32   | 0.0201  |
| Year:MeadowM6           | -0.0269  | 0.0282     | -0.95   | 0.3400  |
| Year:RegionGallatin     | -0.0682  | 0.0145     | -4.70   | 0.0000  |
| MeadowM2:RegionGallatin | -0.5979  | 0.1669     | -3.58   | 0.0003  |
| MeadowM3:RegionGallatin | -0.3184  | 0.1598     | -1.99   | 0.0463  |
| MeadowM5:RegionGallatin | -1.2588  | 0.1758     | -7.16   | 0.0000  |
| MeadowM6:RegionGallatin | 2.2742   | 0.4394     | 5.18    | 0.0000  |

## 9 *Lycaena editha*

Table C17: Poisson regression fitted models for *Lycaena editha*

|    | Region   | Meadow | Model                                  | Sig |
|----|----------|--------|----------------------------------------|-----|
| 1  | Teton    | M1     | $\hat{Y} = 0.147e^{-0.055(YEAR-1997)}$ |     |
| 2  | Teton    | M2     | $\hat{Y} = 2.148e^{0.105(YEAR-1997)}$  | *** |
| 3  | Teton    | M3     | $\hat{Y} = 0.076e^{0.066(YEAR-1997)}$  |     |
| 5  | Teton    | M5     | $\hat{Y} = 2.543e^{0.036(YEAR-1997)}$  | *** |
| 6  | Teton    | M6     | $\hat{Y} = 1.212e^{0.103(YEAR-1997)}$  |     |
| 7  | Gallatin | M1     | $\hat{Y} = 0.34e^{0.125(YEAR-1997)}$   | *** |
| 8  | Gallatin | M2     | $\hat{Y} = 0.236e^{0.285(YEAR-1997)}$  | *** |
| 9  | Gallatin | M3     | $\hat{Y} = 0.36e^{0.246(YEAR-1997)}$   | *** |
| 10 | Gallatin | M4     | $\hat{Y} = 1.159e^{0.166(YEAR-1997)}$  | *** |
| 11 | Gallatin | M5     | $\hat{Y} = 1.979e^{0.216(YEAR-1997)}$  | *** |
| 12 | Gallatin | M6     | $\hat{Y} = 0.534e^{0.283(YEAR-1997)}$  | *** |

Null deviance: 345.80 on 80 degrees of freedom

Residual deviance: 132.64 on 63 degrees of freedom

(51 observations deleted due to missingness)

AIC: 305.48

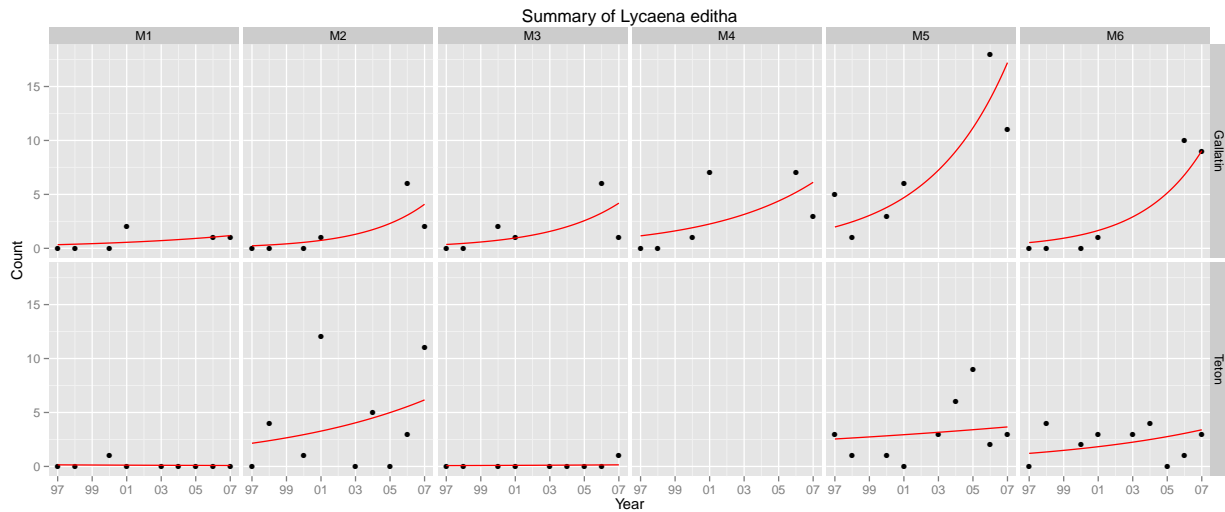

Figure C9: Time series plot of *Lycaena editha* by region and meadow type

# Lycaena editha

Table C18: Poisson regression parameter estimates for Lycaena editha

|                         | Estimate | Std. Error | z value | P-value |
|-------------------------|----------|------------|---------|---------|
| (Intercept)             | -1.9196  | 1.1710     | -1.64   | 0.1011  |
| Year                    | -0.0553  | 0.1293     | -0.43   | 0.6691  |
| MeadowM2                | 2.6843   | 1.2150     | 2.21    | 0.0271  |
| MeadowM3                | -0.6513  | 1.6332     | -0.40   | 0.6901  |
| MeadowM4                | 1.2275   | 1.0504     | 1.17    | 0.2425  |
| MeadowM5                | 2.8529   | 1.1856     | 2.41    | 0.0161  |
| MeadowM6                | 2.1115   | 1.2224     | 1.73    | 0.0841  |
| RegionGallatin          | 0.8399   | 1.1653     | 0.72    | 0.4711  |
| Year:MeadowM2           | 0.1607   | 0.1355     | 1.19    | 0.2357  |
| Year:MeadowM3           | 0.1209   | 0.1546     | 0.78    | 0.4342  |
| Year:MeadowM4           | 0.0418   | 0.1384     | 0.30    | 0.7624  |
| Year:MeadowM5           | 0.0917   | 0.1272     | 0.72    | 0.4708  |
| Year:MeadowM6           | 0.1583   | 0.1339     | 1.18    | 0.2369  |
| Year:RegionGallatin     | 0.1798   | 0.0530     | 3.39    | 0.0007  |
| MeadowM2:RegionGallatin | -3.0495  | 1.2072     | -2.53   | 0.0115  |
| MeadowM3:RegionGallatin | 0.7088   | 1.5559     | 0.46    | 0.6487  |
| MeadowM5:RegionGallatin | -1.0904  | 1.1646     | -0.94   | 0.3491  |
| MeadowM6:RegionGallatin | -1.6592  | 1.1883     | -1.40   | 0.1626  |

## 10 Papilio zelicaon

Table C19: Poisson regression fitted models for Papilio zelicaon

|    | Region   | Meadow | Model                                  | Sig |
|----|----------|--------|----------------------------------------|-----|
| 1  | Teton    | M1     | $\hat{Y} = 1.677e^{-1.686(YEAR-1997)}$ |     |
| 2  | Teton    | M2     | $\hat{Y} = 2.946e^{-0.709(YEAR-1997)}$ |     |
| 3  | Teton    | M3     | $\hat{Y} = 6.106e^{-0.299(YEAR-1997)}$ |     |
| 5  | Teton    | M5     | $\hat{Y} = 0e^{-0.264(YEAR-1997)}$     |     |
| 6  | Teton    | M6     | $\hat{Y} = 1.062e^{-0.588(YEAR-1997)}$ |     |
| 7  | Gallatin | M1     | $\hat{Y} = 3.395e^{-1.758(YEAR-1997)}$ |     |
| 8  | Gallatin | M2     | $\hat{Y} = 5.627e^{-0.781(YEAR-1997)}$ |     |
| 9  | Gallatin | M3     | $\hat{Y} = 1.302e^{-0.371(YEAR-1997)}$ | *** |
| 10 | Gallatin | M4     | $\hat{Y} = 1.317e^{-0.38(YEAR-1997)}$  |     |
| 11 | Gallatin | M5     | $\hat{Y} = 0.825e^{-0.336(YEAR-1997)}$ |     |
| 12 | Gallatin | M6     | $\hat{Y} = 0e^{-0.66(YEAR-1997)}$      |     |

Null deviance: 157.026 on 80 degrees of freedom  
Residual deviance: 37.736 on 63 degrees of freedom  
(51 observations deleted due to missingness)  
AIC: 125.38

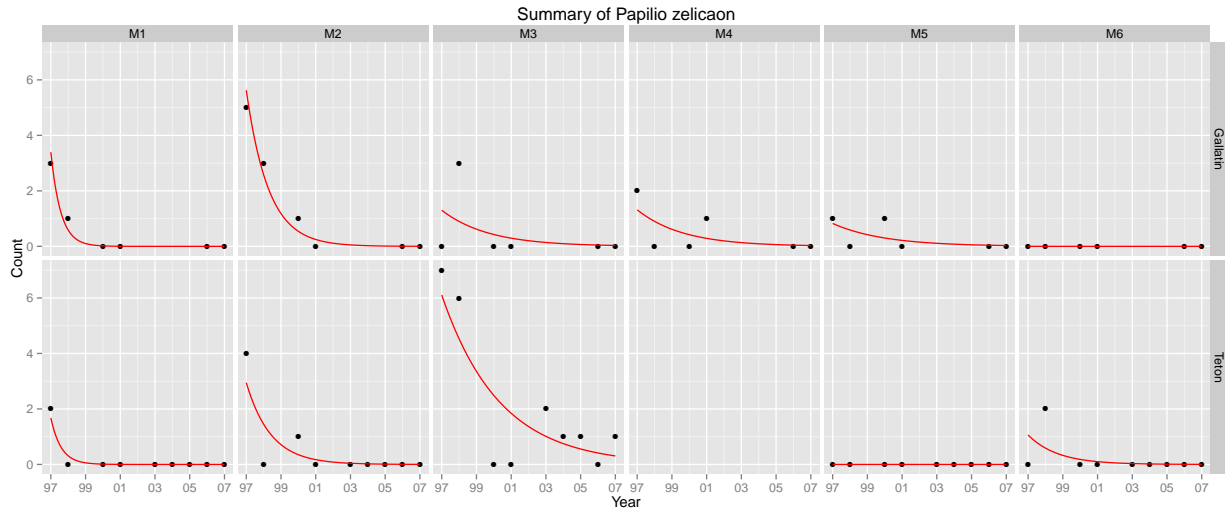

Figure C10: Time series plot of Papilio zelicaon by region and meadow type



# Papilio zelicaon

Table C20: Poisson regression parameter estimates for Papilio zelicaon

|                         | Estimate | Std. Error | z value | P-value |
|-------------------------|----------|------------|---------|---------|
| (Intercept)             | 0.5169   | 0.7279     | 0.71    | 0.4776  |
| Year                    | -1.6865  | 0.9842     | -1.71   | 0.0866  |
| MeadowM2                | 0.5635   | 0.8754     | 0.64    | 0.5197  |
| MeadowM3                | 1.2924   | 0.7892     | 1.64    | 0.1015  |
| MeadowM4                | -0.9467  | 0.8827     | -1.07   | 0.2835  |
| MeadowM5                | -18.6488 | 2928.6096  | -0.01   | 0.9949  |
| MeadowM6                | -0.4571  | 1.1064     | -0.41   | 0.6795  |
| RegionGallatin          | 0.7053   | 0.8673     | 0.81    | 0.4161  |
| Year:MeadowM2           | 0.9775   | 0.9994     | 0.98    | 0.3280  |
| Year:MeadowM3           | 1.3870   | 0.9845     | 1.41    | 0.1589  |
| Year:MeadowM4           | 1.3783   | 1.0223     | 1.35    | 0.1776  |
| Year:MeadowM5           | 1.4221   | 1.0338     | 1.38    | 0.1690  |
| Year:MeadowM6           | 1.0981   | 1.0784     | 1.02    | 0.3086  |
| Year:RegionGallatin     | -0.0718  | 0.2621     | -0.27   | 0.7841  |
| MeadowM2:RegionGallatin | -0.0582  | 1.0392     | -0.06   | 0.9553  |
| MeadowM3:RegionGallatin | -2.2509  | 1.1206     | -2.01   | 0.0446  |
| MeadowM5:RegionGallatin | 17.2348  | 2928.6096  | 0.01    | 0.9953  |
| MeadowM6:RegionGallatin | -17.9370 | 2469.6683  | -0.01   | 0.9942  |

# 11 *Lycaena heteronea*

Table C21: Poisson regression fitted models for *Lycaena heteronea*

|    | Region   | Meadow | Model                                   | Sig |
|----|----------|--------|-----------------------------------------|-----|
| 1  | Teton    | M1     | $\hat{Y} = 0.044e^{0.404(YEAR-1997)}$   |     |
| 2  | Teton    | M2     | $\hat{Y} = 0.016e^{0.376(YEAR-1997)}$   |     |
| 3  | Teton    | M3     | $\hat{Y} = 1.626e^{0.092(YEAR-1997)}$   | *** |
| 5  | Teton    | M5     | $\hat{Y} = 5.693e^{0.101(YEAR-1997)}$   | *** |
| 6  | Teton    | M6     | $\hat{Y} = 31.314e^{0.039(YEAR-1997)}$  | *** |
| 7  | Gallatin | M1     | $\hat{Y} = 0.436e^{0.301(YEAR-1997)}$   | *** |
| 8  | Gallatin | M2     | $\hat{Y} = 0.26e^{0.273(YEAR-1997)}$    | *** |
| 9  | Gallatin | M3     | $\hat{Y} = 1.222e^{-0.01(YEAR-1997)}$   | *** |
| 10 | Gallatin | M4     | $\hat{Y} = 2.398e^{0.105(YEAR-1997)}$   | *** |
| 11 | Gallatin | M5     | $\hat{Y} = 8.701e^{-0.001(YEAR-1997)}$  | *** |
| 12 | Gallatin | M6     | $\hat{Y} = 10.347e^{-0.063(YEAR-1997)}$ | *** |

Null deviance: 1336.13 on 80 degrees of freedom  
Residual deviance: 315.43 on 63 degrees of freedom  
(51 observations deleted due to missingness)  
AIC: 555.26

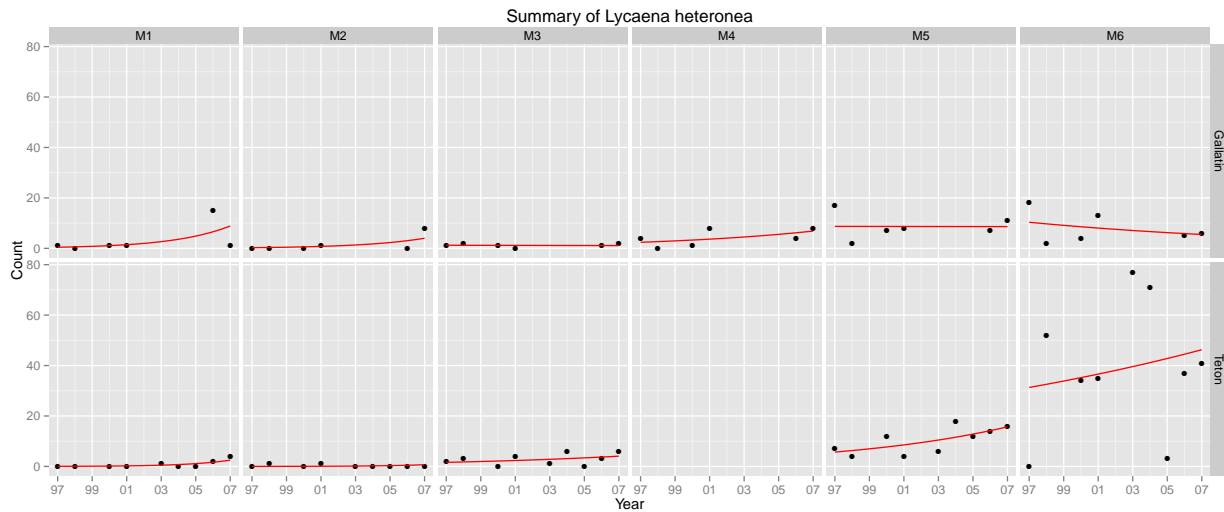

Figure C11: Time series plot of *Lycaena heteronea* by region and meadow type

# Lycaena heteronea

Table C22: Poisson regression parameter estimates for Lycaena heteronea

|                         | Estimate | Std. Error | z value | P-value |
|-------------------------|----------|------------|---------|---------|
| (Intercept)             | -3.1222  | 0.7697     | -4.06   | 0.0000  |
| Year                    | 0.4038   | 0.0803     | 5.03    | 0.0000  |
| MeadowM2                | -1.0195  | 1.3479     | -0.76   | 0.4494  |
| MeadowM3                | 3.6085   | 0.8523     | 4.23    | 0.0000  |
| MeadowM4                | 1.7057   | 0.7678     | 2.22    | 0.0263  |
| MeadowM5                | 4.8615   | 0.7723     | 6.30    | 0.0000  |
| MeadowM6                | 6.5663   | 0.7698     | 8.53    | 0.0000  |
| RegionGallatin          | 2.2913   | 0.5135     | 4.46    | 0.0000  |
| Year:MeadowM2           | -0.0281  | 0.1309     | -0.21   | 0.8300  |
| Year:MeadowM3           | -0.3119  | 0.0947     | -3.29   | 0.0010  |
| Year:MeadowM4           | -0.1966  | 0.0923     | -2.13   | 0.0332  |
| Year:MeadowM5           | -0.3023  | 0.0806     | -3.75   | 0.0002  |
| Year:MeadowM6           | -0.3647  | 0.0804     | -4.54   | 0.0000  |
| Year:RegionGallatin     | -0.1023  | 0.0313     | -3.27   | 0.0011  |
| MeadowM2:RegionGallatin | 0.5021   | 0.8983     | 0.56    | 0.5762  |
| MeadowM3:RegionGallatin | -2.5772  | 0.6332     | -4.07   | 0.0000  |
| MeadowM5:RegionGallatin | -1.8671  | 0.4863     | -3.84   | 0.0001  |
| MeadowM6:RegionGallatin | -3.3987  | 0.4891     | -6.95   | 0.0000  |

## 12 Callophrys sheridanii

Table C23: Poisson regression fitted models for *Callophrys sheridanii*

|    | Region   | Meadow | Model                                   | Sig |
|----|----------|--------|-----------------------------------------|-----|
| 1  | Teton    | M1     | $\hat{Y} = 0e^{-0.332(YEAR-1997)}$      |     |
| 2  | Teton    | M2     | $\hat{Y} = 0e^{-0.332(YEAR-1997)}$      |     |
| 3  | Teton    | M3     | $\hat{Y} = 1e^{-19.743(YEAR-1997)}$     |     |
| 5  | Teton    | M5     | $\hat{Y} = 1e^{-20.596(YEAR-1997)}$     |     |
| 6  | Teton    | M6     | $\hat{Y} = 10.021e^{-2.336(YEAR-1997)}$ |     |
| 7  | Gallatin | M1     | $\hat{Y} = 0e^{0.428(YEAR-1997)}$       |     |
| 8  | Gallatin | M2     | $\hat{Y} = 0e^{0.428(YEAR-1997)}$       |     |
| 9  | Gallatin | M3     | $\hat{Y} = 0e^{-18.983(YEAR-1997)}$     |     |
| 10 | Gallatin | M4     | $\hat{Y} = 0.505e^{-0.5(YEAR-1997)}$    |     |
| 11 | Gallatin | M5     | $\hat{Y} = 1e^{-19.836(YEAR-1997)}$     |     |
| 12 | Gallatin | M6     | $\hat{Y} = 0e^{-1.576(YEAR-1997)}$      |     |

Null deviance: 96.644 on 80 degrees of freedom

Residual deviance: 2.390 on 63 degrees of freedom

(51 observations deleted due to missingness)

AIC: 52.547

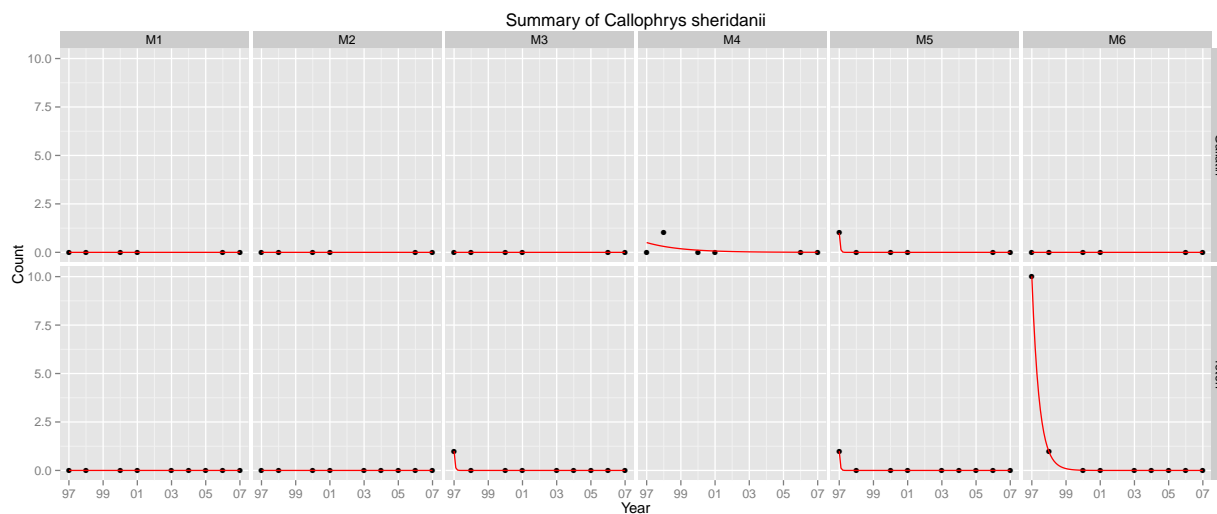

Figure C12: Time series plot of *Callophrys sheridanii* by region and meadow type

# Callophrys sheridanii

Table C24: Poisson regression parameter estimates for *Callophrys sheridanii*

|                         | Estimate | Std. Error  | z value | P-value |
|-------------------------|----------|-------------|---------|---------|
| (Intercept)             | -23.9994 | 73003.5384  | -0.00   | 0.9997  |
| Year                    | -0.3316  | 20055.3452  | -0.00   | 1.0000  |
| MeadowM2                | 0.0000   | 102044.7041 | 0.00    | 1.0000  |
| MeadowM3                | 23.9994  | 73003.5384  | 0.00    | 0.9997  |
| MeadowM4                | 27.5019  | 217000.6619 | 0.00    | 0.9999  |
| MeadowM5                | 23.9994  | 73003.5384  | 0.00    | 0.9997  |
| MeadowM6                | 26.3041  | 73003.5384  | 0.00    | 0.9997  |
| RegionGallatin          | -4.1866  | 201542.6734 | -0.00   | 1.0000  |
| Year:MeadowM2           | -0.0000  | 27366.3243  | -0.00   | 1.0000  |
| Year:MeadowM3           | -19.4112 | 23242.7522  | -0.00   | 0.9993  |
| Year:MeadowM4           | -0.9289  | 22794.5517  | -0.00   | 1.0000  |
| Year:MeadowM5           | -20.2643 | 22810.0159  | -0.00   | 0.9993  |
| Year:MeadowM6           | -2.0043  | 20055.3452  | -0.00   | 0.9999  |
| Year:RegionGallatin     | 0.7601   | 17315.8253  | 0.00    | 1.0000  |
| MeadowM2:RegionGallatin | 0.0000   | 229328.8686 | 0.00    | 1.0000  |
| MeadowM3:RegionGallatin | -18.7219 | 209501.2700 | -0.00   | 0.9999  |
| MeadowM5:RegionGallatin | 4.1866   | 201542.6734 | 0.00    | 1.0000  |
| MeadowM6:RegionGallatin | -20.8209 | 204937.0541 | -0.00   | 0.9999  |

## 13 Boloria kriemhild

Table C25: Poisson regression fitted models for Boloria kriemhild

|    | Region   | Meadow | Model                                  | Sig |
|----|----------|--------|----------------------------------------|-----|
| 1  | Teton    | M1     | $\hat{Y} = 3.198e^{-0.239(YEAR-1997)}$ |     |
| 2  | Teton    | M2     | $\hat{Y} = 4.293e^{0.024(YEAR-1997)}$  | *** |
| 3  | Teton    | M3     | $\hat{Y} = 6.775e^{-0.279(YEAR-1997)}$ |     |
| 5  | Teton    | M5     | $\hat{Y} = 0.408e^{-0.132(YEAR-1997)}$ | *** |
| 6  | Teton    | M6     | $\hat{Y} = 0e^{-0.309(YEAR-1997)}$     |     |
| 7  | Gallatin | M1     | $\hat{Y} = 9.261e^{-0.17(YEAR-1997)}$  | *** |
| 8  | Gallatin | M2     | $\hat{Y} = 2.373e^{0.093(YEAR-1997)}$  | *** |
| 9  | Gallatin | M3     | $\hat{Y} = 10.819e^{-0.21(YEAR-1997)}$ | *** |
| 10 | Gallatin | M4     | $\hat{Y} = 0.712e^{0.068(YEAR-1997)}$  | *** |
| 11 | Gallatin | M5     | $\hat{Y} = 0.432e^{-0.064(YEAR-1997)}$ | *** |
| 12 | Gallatin | M6     | $\hat{Y} = 0.699e^{-0.24(YEAR-1997)}$  | *** |

Null deviance: 321.392 on 80 degrees of freedom  
Residual deviance: 99.127 on 63 degrees of freedom  
(51 observations deleted due to missingness)  
AIC: 265.45

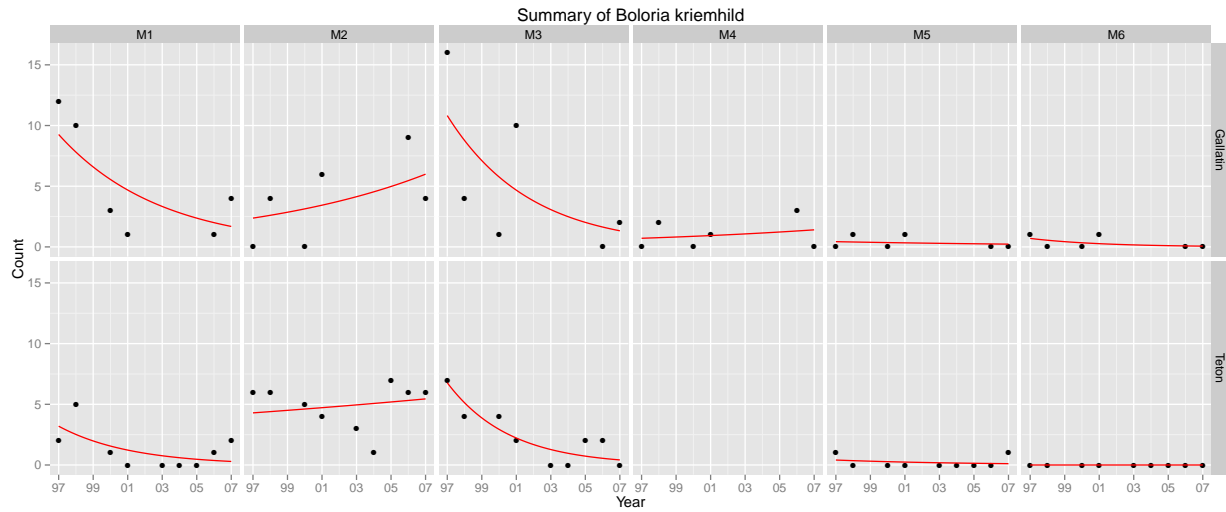

Figure C13: Time series plot of Boloria kriemhild by region and meadow type

# Boloria kriemhild

Table C26: Poisson regression parameter estimates for Boloria kriemhild

|                         | Estimate | Std. Error | z value | P-value |
|-------------------------|----------|------------|---------|---------|
| (Intercept)             | 1.1624   | 0.3522     | 3.30    | 0.0010  |
| Year                    | -0.2392  | 0.0648     | -3.69   | 0.0002  |
| MeadowM2                | 0.2947   | 0.4171     | 0.71    | 0.4799  |
| MeadowM3                | 0.7509   | 0.4202     | 1.79    | 0.0739  |
| MeadowM4                | -2.5662  | 0.7465     | -3.44   | 0.0006  |
| MeadowM5                | -2.0585  | 0.9659     | -2.13   | 0.0331  |
| MeadowM6                | -18.1588 | 1751.8177  | -0.01   | 0.9917  |
| RegionGallatin          | 1.0635   | 0.3784     | 2.81    | 0.0050  |
| Year:MeadowM2           | 0.2630   | 0.0653     | 4.03    | 0.0001  |
| Year:MeadowM3           | -0.0394  | 0.0727     | -0.54   | 0.5877  |
| Year:MeadowM4           | 0.2384   | 0.1190     | 2.00    | 0.0452  |
| Year:MeadowM5           | 0.1067   | 0.1562     | 0.68    | 0.4946  |
| Year:MeadowM6           | -0.0696  | 0.2851     | -0.24   | 0.8071  |
| Year:RegionGallatin     | 0.0689   | 0.0515     | 1.34    | 0.1812  |
| MeadowM2:RegionGallatin | -1.6564  | 0.4624     | -3.58   | 0.0003  |
| MeadowM3:RegionGallatin | -0.5954  | 0.4493     | -1.33   | 0.1851  |
| MeadowM5:RegionGallatin | -1.0075  | 1.0617     | -0.95   | 0.3426  |
| MeadowM6:RegionGallatin | 15.5744  | 1751.8177  | 0.01    | 0.9929  |

## 14 Speyeria egleis

Table C27: Poisson regression fitted models for *Speyeria egleis*

|    | Region   | Meadow | Model                                 | Sig |
|----|----------|--------|---------------------------------------|-----|
| 1  | Teton    | M1     | $\hat{Y} = 0e^{1.313(YEAR-1997)}$     |     |
| 2  | Teton    | M2     | $\hat{Y} = 1e^{-16.57(YEAR-1997)}$    |     |
| 3  | Teton    | M3     | $\hat{Y} = 0.004e^{0.683(YEAR-1997)}$ |     |
| 5  | Teton    | M5     | $\hat{Y} = 0e^{0.826(YEAR-1997)}$     |     |
| 6  | Teton    | M6     | $\hat{Y} = 0e^{0.698(YEAR-1997)}$     |     |
| 7  | Gallatin | M1     | $\hat{Y} = 0e^{1.04(YEAR-1997)}$      |     |
| 8  | Gallatin | M2     | $\hat{Y} = 0e^{-16.843(YEAR-1997)}$   |     |
| 9  | Gallatin | M3     | $\hat{Y} = 0.063e^{0.409(YEAR-1997)}$ |     |
| 10 | Gallatin | M4     | $\hat{Y} = 0.016e^{0.425(YEAR-1997)}$ |     |
| 11 | Gallatin | M5     | $\hat{Y} = 0.005e^{0.553(YEAR-1997)}$ |     |
| 12 | Gallatin | M6     | $\hat{Y} = 0.024e^{0.425(YEAR-1997)}$ |     |

Null deviance: 125.71 on 80 degrees of freedom  
Residual deviance: 50.75 on 63 degrees of freedom  
(51 observations deleted due to missingness)  
AIC: 112.58

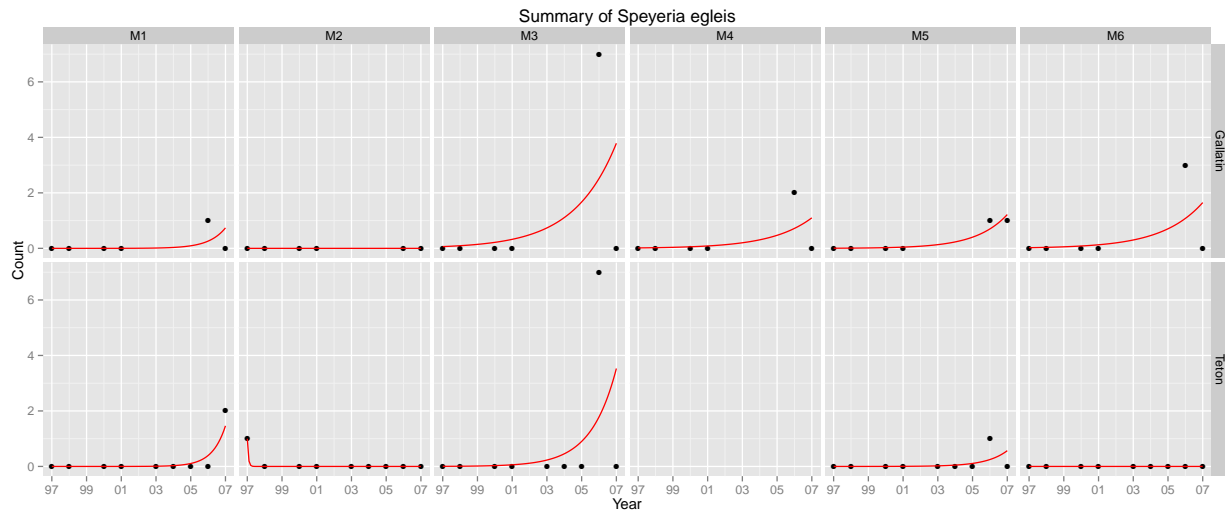

Figure C14: Time series plot of *Speyeria egleis* by region and meadow type



# Speyeria egleis

Table C28: Poisson regression parameter estimates for *Speyeria egleis*

|                         | Estimate | Std. Error | z value | P-value |
|-------------------------|----------|------------|---------|---------|
| (Intercept)             | -12.7476 | 8.7397     | -1.46   | 0.1447  |
| Year                    | 1.3128   | 0.9039     | 1.45    | 0.1464  |
| MeadowM2                | 12.7476  | 8.7967     | 1.45    | 0.1473  |
| MeadowM3                | 7.1833   | 8.9489     | 0.80    | 0.4221  |
| MeadowM4                | 6.5469   | 9.7152     | 0.67    | 0.5004  |
| MeadowM5                | 3.9215   | 9.8208     | 0.40    | 0.6897  |
| MeadowM6                | -14.4943 | 10885.6421 | -0.00   | 0.9989  |
| RegionGallatin          | 2.0461   | 3.3707     | 0.61    | 0.5438  |
| Year:MeadowM2           | -17.8828 | 2404.1842  | -0.01   | 0.9941  |
| Year:MeadowM3           | -0.6303  | 0.9287     | -0.68   | 0.4973  |
| Year:MeadowM4           | -0.6147  | 0.9998     | -0.61   | 0.5387  |
| Year:MeadowM5           | -0.4868  | 1.0201     | -0.48   | 0.6332  |
| Year:MeadowM6           | -0.6147  | 0.9790     | -0.63   | 0.5300  |
| Year:RegionGallatin     | -0.2732  | 0.3234     | -0.84   | 0.3983  |
| MeadowM2:RegionGallatin | -21.7649 | 11607.8104 | -0.00   | 0.9985  |
| MeadowM3:RegionGallatin | 0.7559   | 1.3567     | 0.56    | 0.5774  |
| MeadowM5:RegionGallatin | 1.4479   | 1.7397     | 0.83    | 0.4053  |
| MeadowM6:RegionGallatin | 21.4466  | 10885.6381 | 0.00    | 0.9984  |

## 15 Plebejus shasta

Table C29: Poisson regression fitted models for Plebejus shasta

|    | Region   | Meadow | Model                                 | Sig |
|----|----------|--------|---------------------------------------|-----|
| 1  | Teton    | M1     | $\hat{Y} = 0e^{-17.275(YEAR-1997)}$   |     |
| 2  | Teton    | M2     | $\hat{Y} = 0e^{0.176(YEAR-1997)}$     |     |
| 3  | Teton    | M3     | $\hat{Y} = 0.419e^{0.105(YEAR-1997)}$ |     |
| 5  | Teton    | M5     | $\hat{Y} = 0.19e^{0.237(YEAR-1997)}$  |     |
| 6  | Teton    | M6     | $\hat{Y} = 0.469e^{0.062(YEAR-1997)}$ |     |
| 7  | Gallatin | M1     | $\hat{Y} = 0.002e^{0.639(YEAR-1997)}$ |     |
| 8  | Gallatin | M2     | $\hat{Y} = 0e^{18.09(YEAR-1997)}$     |     |
| 9  | Gallatin | M3     | $\hat{Y} = 0e^{18.019(YEAR-1997)}$    |     |
| 10 | Gallatin | M4     | $\hat{Y} = 0e^{0(YEAR-1997)}$         |     |
| 11 | Gallatin | M5     | $\hat{Y} = 0e^{18.151(YEAR-1997)}$    |     |
| 12 | Gallatin | M6     | $\hat{Y} = 0e^{17.976(YEAR-1997)}$    |     |

Null deviance: 150.177 on 80 degrees of freedom  
Residual deviance: 71.464 on 63 degrees of freedom  
(51 observations deleted due to missingness)  
AIC: 138.34

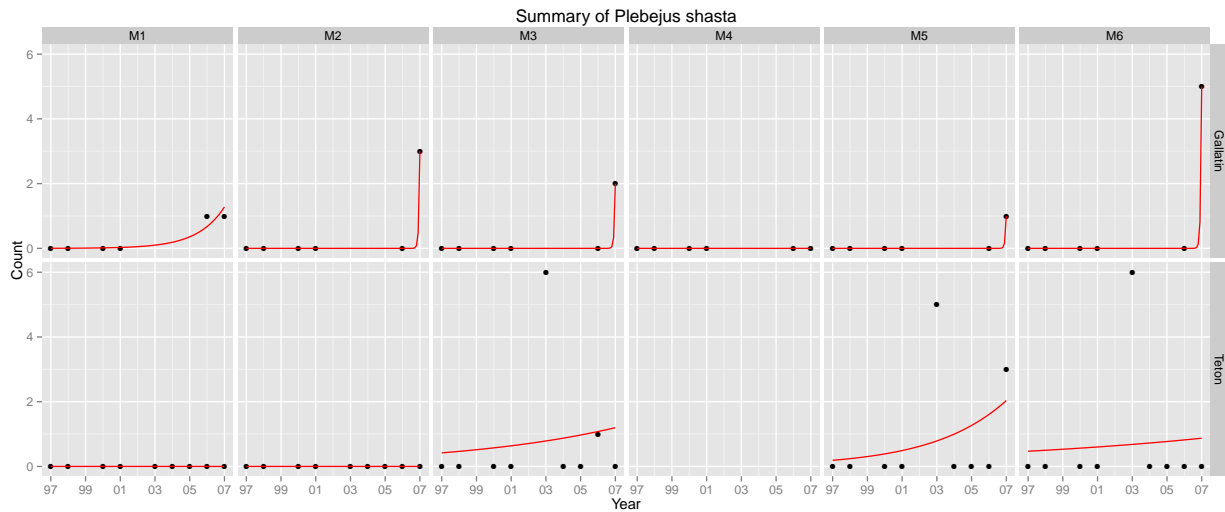

Figure C15: Time series plot of Plebejus shasta by region and meadow type

# Plebejus shasta

Table C30: Poisson regression parameter estimates for Plebejus shasta

|                         | Estimate  | Std. Error | z value | P-value |
|-------------------------|-----------|------------|---------|---------|
| (Intercept)             | -18.3980  | 5996.9013  | -0.00   | 0.9976  |
| Year                    | -17.2751  | 1665.7525  | -0.01   | 0.9917  |
| MeadowM2                | -4.9225   | 24639.7292 | -0.00   | 0.9998  |
| MeadowM3                | 17.5276   | 5996.9014  | 0.00    | 0.9977  |
| MeadowM4                | -16.1574  | 26836.3891 | -0.00   | 0.9995  |
| MeadowM5                | 16.7367   | 5996.9014  | 0.00    | 0.9978  |
| MeadowM6                | 17.6413   | 5996.9014  | 0.00    | 0.9977  |
| RegionGallatin          | 12.2528   | 5996.9045  | 0.00    | 0.9984  |
| Year:MeadowM2           | 17.4513   | 2564.2259  | 0.01    | 0.9946  |
| Year:MeadowM3           | 17.3802   | 1665.7525  | 0.01    | 0.9917  |
| Year:MeadowM4           | -0.6390   | 4568.9302  | -0.00   | 0.9999  |
| Year:MeadowM5           | 17.5123   | 1665.7525  | 0.01    | 0.9916  |
| Year:MeadowM6           | 17.3371   | 1665.7525  | 0.01    | 0.9917  |
| Year:RegionGallatin     | 17.9141   | 1665.7524  | 0.01    | 0.9914  |
| MeadowM2:RegionGallatin | -168.7363 | 21120.2821 | -0.01   | 0.9936  |
| MeadowM3:RegionGallatin | -190.8809 | 17704.1220 | -0.01   | 0.9914  |
| MeadowM5:RegionGallatin | -192.1045 | 17704.1221 | -0.01   | 0.9913  |
| MeadowM6:RegionGallatin | -189.6475 | 17704.1220 | -0.01   | 0.9915  |

## 16 Euphilotes enoptes ancilla

Table C31: Poisson regression fitted models for Euphilotes enoptes ancilla

|    | Region   | Meadow | Model                                  | Sig |
|----|----------|--------|----------------------------------------|-----|
| 1  | Teton    | M1     | $\hat{Y} = 0.158e^{0.261(YEAR-1997)}$  |     |
| 2  | Teton    | M2     | $\hat{Y} = 0.29e^{0.179(YEAR-1997)}$   |     |
| 3  | Teton    | M3     | $\hat{Y} = 0.294e^{0.286(YEAR-1997)}$  |     |
| 5  | Teton    | M5     | $\hat{Y} = 0.415e^{0.233(YEAR-1997)}$  |     |
| 6  | Teton    | M6     | $\hat{Y} = 0.186e^{0.368(YEAR-1997)}$  |     |
| 7  | Gallatin | M1     | $\hat{Y} = 1.052e^{0.022(YEAR-1997)}$  | *** |
| 8  | Gallatin | M2     | $\hat{Y} = 0.426e^{-0.06(YEAR-1997)}$  | *** |
| 9  | Gallatin | M3     | $\hat{Y} = 0.398e^{0.047(YEAR-1997)}$  | *** |
| 10 | Gallatin | M4     | $\hat{Y} = 1.36e^{-0.036(YEAR-1997)}$  | *** |
| 11 | Gallatin | M5     | $\hat{Y} = 1.197e^{-0.006(YEAR-1997)}$ | *** |
| 12 | Gallatin | M6     | $\hat{Y} = 0.083e^{0.129(YEAR-1997)}$  | *** |

Null deviance: 280.30 on 80 degrees of freedom

Residual deviance: 199.86 on 63 degrees of freedom

(51 observations deleted due to missingness)

AIC: 313.77

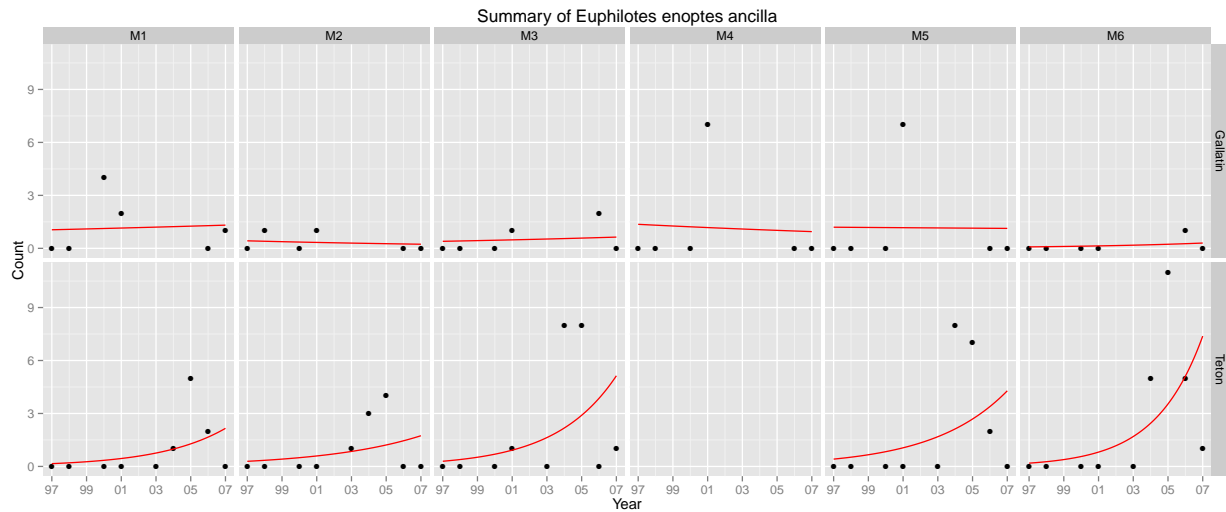

Figure C16: Time series plot of Euphilotes enoptes ancilla by region and meadow type

# Euphilotes enoptes ancilla

Table C32: Poisson regression parameter estimates for Euphilotes enoptes ancilla

|                         | Estimate | Std. Error | z value | P-value |
|-------------------------|----------|------------|---------|---------|
| (Intercept)             | -1.8455  | 0.8319     | -2.22   | 0.0265  |
| Year                    | 0.2615   | 0.0984     | 2.66    | 0.0079  |
| MeadowM2                | 0.6069   | 1.1263     | 0.54    | 0.5900  |
| MeadowM3                | 0.6201   | 1.0170     | 0.61    | 0.5421  |
| MeadowM4                | 0.2573   | 0.7917     | 0.33    | 0.7451  |
| MeadowM5                | 0.9660   | 0.9227     | 1.05    | 0.2952  |
| MeadowM6                | 0.1642   | 1.1356     | 0.14    | 0.8850  |
| RegionGallatin          | 1.8959   | 0.7924     | 2.39    | 0.0167  |
| Year:MeadowM2           | -0.0822  | 0.1375     | -0.60   | 0.5497  |
| Year:MeadowM3           | 0.0247   | 0.1197     | 0.21    | 0.8366  |
| Year:MeadowM4           | -0.0584  | 0.1342     | -0.44   | 0.6633  |
| Year:MeadowM5           | -0.0280  | 0.1076     | -0.26   | 0.7944  |
| Year:MeadowM6           | 0.1066   | 0.1334     | 0.80    | 0.4241  |
| Year:RegionGallatin     | -0.2392  | 0.0823     | -2.91   | 0.0037  |
| MeadowM2:RegionGallatin | -1.5107  | 1.0509     | -1.44   | 0.1506  |
| MeadowM3:RegionGallatin | -1.5909  | 0.8719     | -1.82   | 0.0680  |
| MeadowM5:RegionGallatin | -0.8364  | 0.7561     | -1.11   | 0.2686  |
| MeadowM6:RegionGallatin | -2.7079  | 1.1819     | -2.29   | 0.0220  |

## 17 Speyeria zerene

Table C33: Poisson regression fitted models for *Speyeria zerene*

|    | Region   | Meadow | Model                                 | Sig |
|----|----------|--------|---------------------------------------|-----|
| 1  | Teton    | M1     | $\hat{Y} = 0e^{15.697(YEAR-1997)}$    |     |
| 2  | Teton    | M2     | $\hat{Y} = 0e^{0.614(YEAR-1997)}$     |     |
| 3  | Teton    | M3     | $\hat{Y} = 0.001e^{0.725(YEAR-1997)}$ |     |
| 5  | Teton    | M5     | $\hat{Y} = 0.521e^{0.225(YEAR-1997)}$ |     |
| 6  | Teton    | M6     | $\hat{Y} = 0.056e^{0.335(YEAR-1997)}$ |     |
| 7  | Gallatin | M1     | $\hat{Y} = 0e^{15.722(YEAR-1997)}$    |     |
| 8  | Gallatin | M2     | $\hat{Y} = 0.002e^{0.639(YEAR-1997)}$ |     |
| 9  | Gallatin | M3     | $\hat{Y} = 0e^{0.75(YEAR-1997)}$      |     |
| 10 | Gallatin | M4     | $\hat{Y} = 0.152e^{0.267(YEAR-1997)}$ |     |
| 11 | Gallatin | M5     | $\hat{Y} = 0.279e^{0.249(YEAR-1997)}$ |     |
| 12 | Gallatin | M6     | $\hat{Y} = 0.056e^{0.359(YEAR-1997)}$ |     |

Null deviance: 181.18 on 80 degrees of freedom

Residual deviance: 80.79 on 63 degrees of freedom

(51 observations deleted due to missingness)

AIC: 162.63

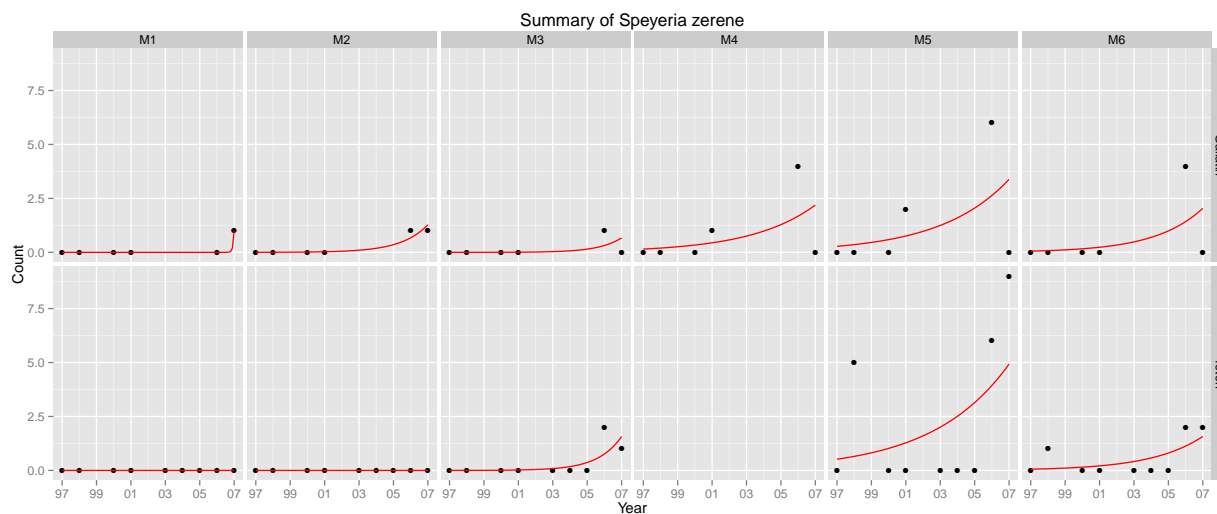

Figure C17: Time series plot of *Speyeria zerene* by region and meadow type

# Speyeria zerene

Table C34: Poisson regression parameter estimates for *Speyeria zerene*

|                         | Estimate  | Std. Error | z value | P-value |
|-------------------------|-----------|------------|---------|---------|
| (Intercept)             | -175.2654 | 16730.5654 | -0.01   | 0.9916  |
| Year                    | 15.6972   | 1573.2579  | 0.01    | 0.9920  |
| MeadowM2                | 149.5563  | 18285.7701 | 0.01    | 0.9935  |
| MeadowM3                | 168.4679  | 16730.5659 | 0.01    | 0.9920  |
| MeadowM4                | 155.3333  | 15732.5787 | 0.01    | 0.9921  |
| MeadowM5                | 174.6124  | 16730.5654 | 0.01    | 0.9917  |
| MeadowM6                | 172.3753  | 16730.5654 | 0.01    | 0.9918  |
| RegionGallatin          | 18.0473   | 5691.9069  | 0.00    | 0.9975  |
| Year:MeadowM2           | -15.0828  | 1573.2581  | -0.01   | 0.9924  |
| Year:MeadowM3           | -14.9722  | 1573.2580  | -0.01   | 0.9924  |
| Year:MeadowM4           | -15.4549  | 1573.2579  | -0.01   | 0.9922  |
| Year:MeadowM5           | -15.4724  | 1573.2579  | -0.01   | 0.9922  |
| Year:MeadowM6           | -15.3627  | 1573.2579  | -0.01   | 0.9922  |
| Year:RegionGallatin     | 0.0246    | 0.1265     | 0.19    | 0.8457  |
| MeadowM2:RegionGallatin | 1.5167    | 9319.6213  | 0.00    | 0.9999  |
| MeadowM3:RegionGallatin | -19.1449  | 5691.9069  | -0.00   | 0.9973  |
| MeadowM5:RegionGallatin | -18.6705  | 5691.9068  | -0.00   | 0.9974  |
| MeadowM6:RegionGallatin | -18.0365  | 5691.9068  | -0.00   | 0.9975  |

## 18 Phyciodes campestris

Table C35: Poisson regression fitted models for Phyciodes campestris

|    | Region   | Meadow | Model                                   | Sig |
|----|----------|--------|-----------------------------------------|-----|
| 1  | Teton    | M1     | $\hat{Y} = 2.714e^{-0.02(YEAR-1997)}$   |     |
| 2  | Teton    | M2     | $\hat{Y} = 0.615e^{0.084(YEAR-1997)}$   | *** |
| 3  | Teton    | M3     | $\hat{Y} = 2.348e^{0.031(YEAR-1997)}$   |     |
| 5  | Teton    | M5     | $\hat{Y} = 1.918e^{0.044(YEAR-1997)}$   |     |
| 6  | Teton    | M6     | $\hat{Y} = 0.313e^{-0.069(YEAR-1997)}$  | *** |
| 7  | Gallatin | M1     | $\hat{Y} = 19.125e^{-0.097(YEAR-1997)}$ | *** |
| 8  | Gallatin | M2     | $\hat{Y} = 12.584e^{0.007(YEAR-1997)}$  | *** |
| 9  | Gallatin | M3     | $\hat{Y} = 50.379e^{-0.046(YEAR-1997)}$ | *** |
| 10 | Gallatin | M4     | $\hat{Y} = 29.505e^{-0.089(YEAR-1997)}$ | *** |
| 11 | Gallatin | M5     | $\hat{Y} = 6.535e^{-0.033(YEAR-1997)}$  | *** |
| 12 | Gallatin | M6     | $\hat{Y} = 12.899e^{-0.146(YEAR-1997)}$ | *** |

Null deviance: 1586.42 on 80 degrees of freedom  
Residual deviance: 655.79 on 63 degrees of freedom  
(51 observations deleted due to missingness)  
AIC: 895.84

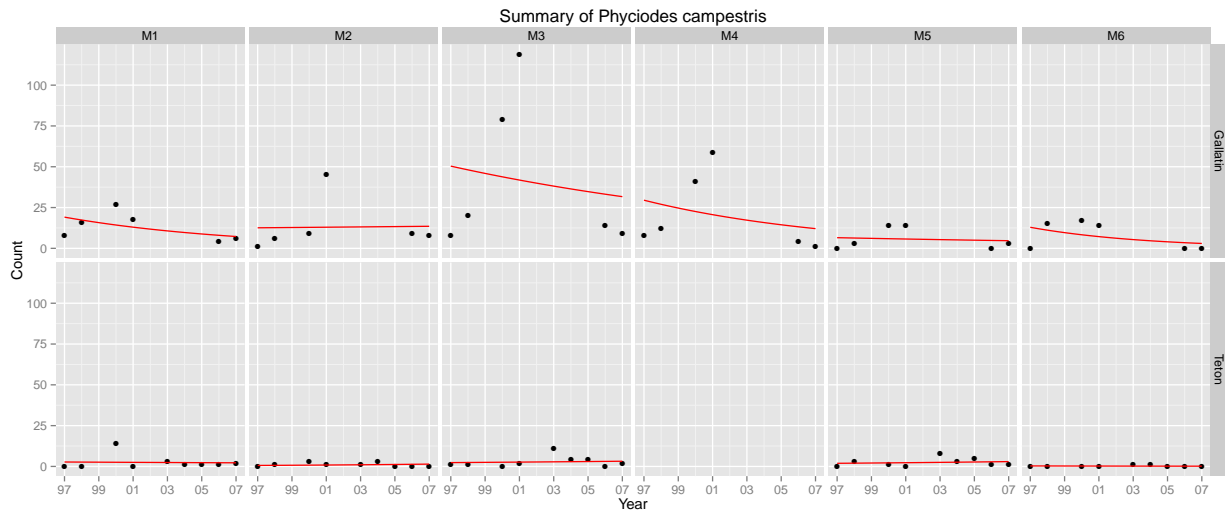

Figure C18: Time series plot of Phyciodes campestris by region and meadow type



# Phyciodes campestris

Table C36: Poisson regression parameter estimates for Phyciodes campestris

|                         | Estimate | Std. Error | z value | P-value |
|-------------------------|----------|------------|---------|---------|
| (Intercept)             | 0.9984   | 0.3019     | 3.31    | 0.0009  |
| Year                    | -0.0200  | 0.0418     | -0.48   | 0.6324  |
| MeadowM2                | -1.4850  | 0.4646     | -3.20   | 0.0014  |
| MeadowM3                | -0.1447  | 0.3459     | -0.42   | 0.6756  |
| MeadowM4                | 0.4335   | 0.1957     | 2.22    | 0.0268  |
| MeadowM5                | -0.3471  | 0.4034     | -0.86   | 0.3896  |
| MeadowM6                | -2.1601  | 0.7834     | -2.76   | 0.0058  |
| RegionGallatin          | 1.9527   | 0.3045     | 6.41    | 0.0000  |
| Year:MeadowM2           | 0.1041   | 0.0416     | 2.50    | 0.0124  |
| Year:MeadowM3           | 0.0506   | 0.0345     | 1.47    | 0.1426  |
| Year:MeadowM4           | 0.0077   | 0.0404     | 0.19    | 0.8491  |
| Year:MeadowM5           | 0.0635   | 0.0484     | 1.31    | 0.1896  |
| Year:MeadowM6           | -0.0492  | 0.0557     | -0.88   | 0.3766  |
| Year:RegionGallatin     | -0.0770  | 0.0378     | -2.04   | 0.0415  |
| MeadowM2:RegionGallatin | 1.0665   | 0.4359     | 2.45    | 0.0144  |
| MeadowM3:RegionGallatin | 1.1133   | 0.3272     | 3.40    | 0.0007  |
| MeadowM5:RegionGallatin | -0.7268  | 0.3754     | -1.94   | 0.0529  |
| MeadowM6:RegionGallatin | 1.7662   | 0.7682     | 2.30    | 0.0215  |

## 19 Colias philodice

Table C37: Poisson regression fitted models for *Colias philodice*

|    | Region   | Meadow | Model                                  | Sig |
|----|----------|--------|----------------------------------------|-----|
| 1  | Teton    | M1     | $\hat{Y} = 0.164e^{0.193(YEAR-1997)}$  |     |
| 2  | Teton    | M2     | $\hat{Y} = 0.663e^{0.117(YEAR-1997)}$  |     |
| 3  | Teton    | M3     | $\hat{Y} = 0.342e^{0.201(YEAR-1997)}$  |     |
| 5  | Teton    | M5     | $\hat{Y} = 1.933e^{-0.043(YEAR-1997)}$ | *** |
| 6  | Teton    | M6     | $\hat{Y} = 0.338e^{-0.003(YEAR-1997)}$ |     |
| 7  | Gallatin | M1     | $\hat{Y} = 0.064e^{0.31(YEAR-1997)}$   |     |
| 8  | Gallatin | M2     | $\hat{Y} = 0.432e^{0.234(YEAR-1997)}$  |     |
| 9  | Gallatin | M3     | $\hat{Y} = 0.261e^{0.318(YEAR-1997)}$  |     |
| 10 | Gallatin | M4     | $\hat{Y} = 0.208e^{0.226(YEAR-1997)}$  |     |
| 11 | Gallatin | M5     | $\hat{Y} = 1.949e^{0.074(YEAR-1997)}$  | *** |
| 12 | Gallatin | M6     | $\hat{Y} = 1.088e^{0.114(YEAR-1997)}$  | *** |

Null deviance: 175.85 on 80 degrees of freedom

Residual deviance: 102.24 on 63 degrees of freedom

(51 observations deleted due to missingness)

AIC: 251.53

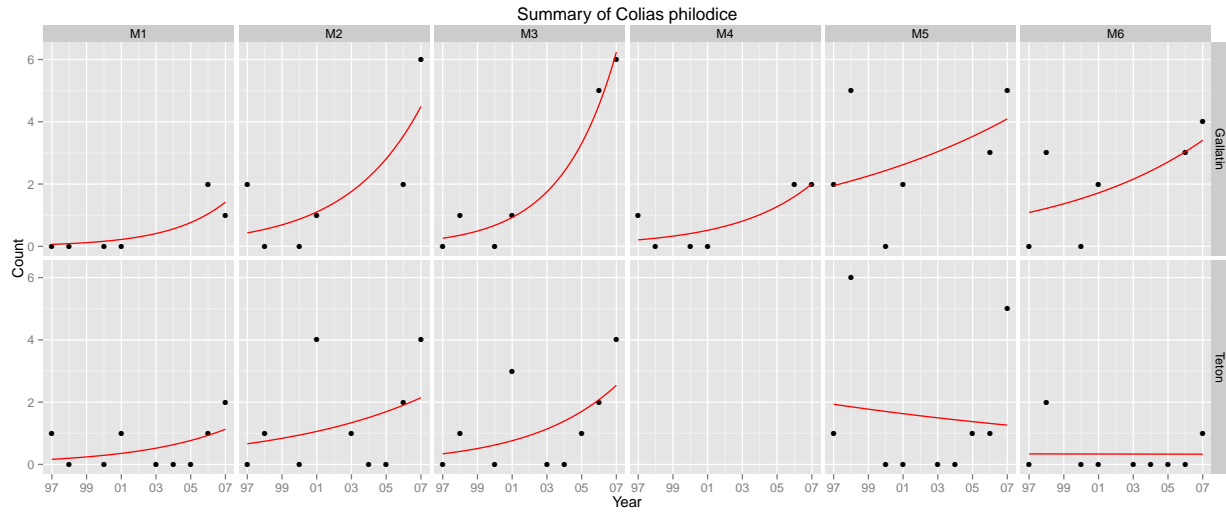

Figure C19: Time series plot of *Colias philodice* by region and meadow type

## Colias philodice

Table C38: Poisson regression parameter estimates for Colias philodice

|                         | Estimate | Std. Error | z value | P-value |
|-------------------------|----------|------------|---------|---------|
| (Intercept)             | -1.8088  | 1.0413     | -1.74   | 0.0824  |
| Year                    | 0.1933   | 0.1308     | 1.48    | 0.1397  |
| MeadowM2                | 1.3981   | 1.1531     | 1.21    | 0.2253  |
| MeadowM3                | 0.7348   | 1.2046     | 0.61    | 0.5419  |
| MeadowM4                | 1.1796   | 1.6986     | 0.69    | 0.4874  |
| MeadowM5                | 2.4677   | 1.0882     | 2.27    | 0.0233  |
| MeadowM6                | 0.7243   | 1.2404     | 0.58    | 0.5593  |
| RegionGallatin          | -0.9397  | 0.9046     | -1.04   | 0.2989  |
| Year:MeadowM2           | -0.0760  | 0.1451     | -0.52   | 0.6004  |
| Year:MeadowM3           | 0.0074   | 0.1496     | 0.05    | 0.9603  |
| Year:MeadowM4           | -0.0836  | 0.1921     | -0.44   | 0.6635  |
| Year:MeadowM5           | -0.2359  | 0.1387     | -1.70   | 0.0890  |
| Year:MeadowM6           | -0.1959  | 0.1495     | -1.31   | 0.1899  |
| Year:RegionGallatin     | 0.1168   | 0.0646     | 1.81    | 0.0708  |
| MeadowM2:RegionGallatin | 0.5121   | 0.8595     | 0.60    | 0.5513  |
| MeadowM3:RegionGallatin | 0.6692   | 0.8554     | 0.78    | 0.4340  |
| MeadowM5:RegionGallatin | 0.9482   | 0.8485     | 1.12    | 0.2638  |
| MeadowM6:RegionGallatin | 2.1082   | 1.0010     | 2.11    | 0.0352  |

## 20 Coenonympha tullia inornata

Table C39: Poisson regression fitted models for *Coenonympha tullia inornata*

|    | Region   | Meadow | Model                                   | Sig |
|----|----------|--------|-----------------------------------------|-----|
| 1  | Teton    | M1     | $\hat{Y} = 2.725e^{0.088(YEAR-1997)}$   |     |
| 2  | Teton    | M2     | $\hat{Y} = 3.733e^{0.101(YEAR-1997)}$   |     |
| 3  | Teton    | M3     | $\hat{Y} = 0.74e^{0.196(YEAR-1997)}$    | *** |
| 5  | Teton    | M5     | $\hat{Y} = 17.484e^{-0.059(YEAR-1997)}$ | *** |
| 6  | Teton    | M6     | $\hat{Y} = 34.71e^{0.023(YEAR-1997)}$   | *** |
| 7  | Gallatin | M1     | $\hat{Y} = 0.424e^{0.035(YEAR-1997)}$   | *** |
| 8  | Gallatin | M2     | $\hat{Y} = 1.985e^{0.048(YEAR-1997)}$   | *** |
| 9  | Gallatin | M3     | $\hat{Y} = 0.304e^{0.142(YEAR-1997)}$   | *** |
| 10 | Gallatin | M4     | $\hat{Y} = 0e^{15.052(YEAR-1997)}$      | *** |
| 11 | Gallatin | M5     | $\hat{Y} = 7.389e^{-0.113(YEAR-1997)}$  | *** |
| 12 | Gallatin | M6     | $\hat{Y} = 7.613e^{-0.031(YEAR-1997)}$  | *** |

Null deviance: 1268.33 on 80 degrees of freedom

Residual deviance: 320.32 on 63 degrees of freedom

(51 observations deleted due to missingness)

AIC: 583.06

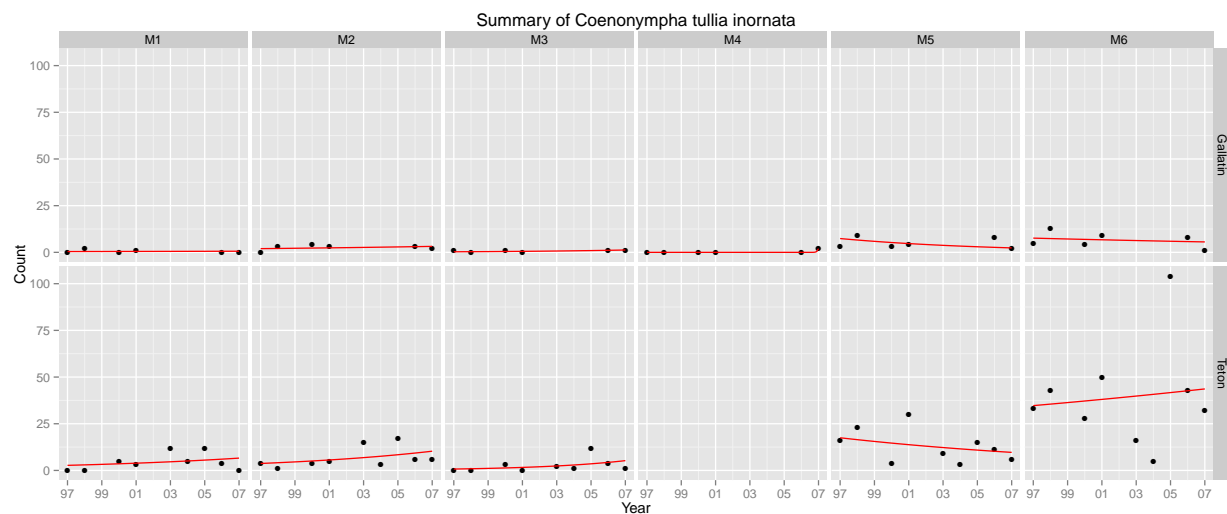

Figure C20: Time series plot of *Coenonympha tullia inornata* by region and meadow type

# Coenonympha tullia inornata

Table C40: Poisson regression parameter estimates for Coenonympha tullia inornata

|                         | Estimate  | Std. Error | z value | P-value |
|-------------------------|-----------|------------|---------|---------|
| (Intercept)             | 1.0023    | 0.3353     | 2.99    | 0.0028  |
| Year                    | 0.0885    | 0.0473     | 1.87    | 0.0616  |
| MeadowM2                | 0.3150    | 0.4246     | 0.74    | 0.4582  |
| MeadowM3                | -1.3038   | 0.6196     | -2.10   | 0.0354  |
| MeadowM4                | -148.9713 | 7959.3865  | -0.02   | 0.9851  |
| MeadowM5                | 1.8590    | 0.3660     | 5.08    | 0.0000  |
| MeadowM6                | 2.5447    | 0.3492     | 7.29    | 0.0000  |
| RegionGallatin          | -1.8597   | 0.6233     | -2.98   | 0.0028  |
| Year:MeadowM2           | 0.0130    | 0.0592     | 0.22    | 0.8260  |
| Year:MeadowM3           | 0.1074    | 0.0814     | 1.32    | 0.1871  |
| Year:MeadowM4           | 15.0176   | 795.9387   | 0.02    | 0.9849  |
| Year:MeadowM5           | -0.1477   | 0.0534     | -2.77   | 0.0057  |
| Year:MeadowM6           | -0.0656   | 0.0496     | -1.32   | 0.1860  |
| Year:RegionGallatin     | -0.0539   | 0.0321     | -1.68   | 0.0937  |
| MeadowM2:RegionGallatin | 1.2282    | 0.6681     | 1.84    | 0.0660  |
| MeadowM3:RegionGallatin | 0.9694    | 0.8119     | 1.19    | 0.2325  |
| MeadowM5:RegionGallatin | 0.9984    | 0.6396     | 1.56    | 0.1185  |
| MeadowM6:RegionGallatin | 0.3425    | 0.6248     | 0.55    | 0.5836  |

## 21 Euphydryas chalcedona

Table C41: Poisson regression fitted models for Euphydryas chalcedona

|    | Region   | Meadow | Model                                  | Sig |
|----|----------|--------|----------------------------------------|-----|
| 1  | Teton    | M1     | $\hat{Y} = 0.753e^{-0.348(YEAR-1997)}$ |     |
| 2  | Teton    | M2     | $\hat{Y} = 0.531e^{-0.588(YEAR-1997)}$ |     |
| 3  | Teton    | M3     | $\hat{Y} = 0.991e^{-0.288(YEAR-1997)}$ |     |
| 5  | Teton    | M5     | $\hat{Y} = 3.535e^{0.018(YEAR-1997)}$  |     |
| 6  | Teton    | M6     | $\hat{Y} = 1.593e^{-0.377(YEAR-1997)}$ |     |
| 7  | Gallatin | M1     | $\hat{Y} = 0.102e^{0.316(YEAR-1997)}$  | *** |
| 8  | Gallatin | M2     | $\hat{Y} = 0e^{0.075(YEAR-1997)}$      | *** |
| 9  | Gallatin | M3     | $\hat{Y} = 0.012e^{0.375(YEAR-1997)}$  | *** |
| 10 | Gallatin | M4     | $\hat{Y} = 0e^{0.865(YEAR-1997)}$      | *** |
| 11 | Gallatin | M5     | $\hat{Y} = 0.001e^{0.681(YEAR-1997)}$  | *** |
| 12 | Gallatin | M6     | $\hat{Y} = 0.26e^{0.286(YEAR-1997)}$   | *** |

Null deviance: 258.46 on 80 degrees of freedom

Residual deviance: 124.55 on 63 degrees of freedom

(51 observations deleted due to missingness)

AIC: 212.81

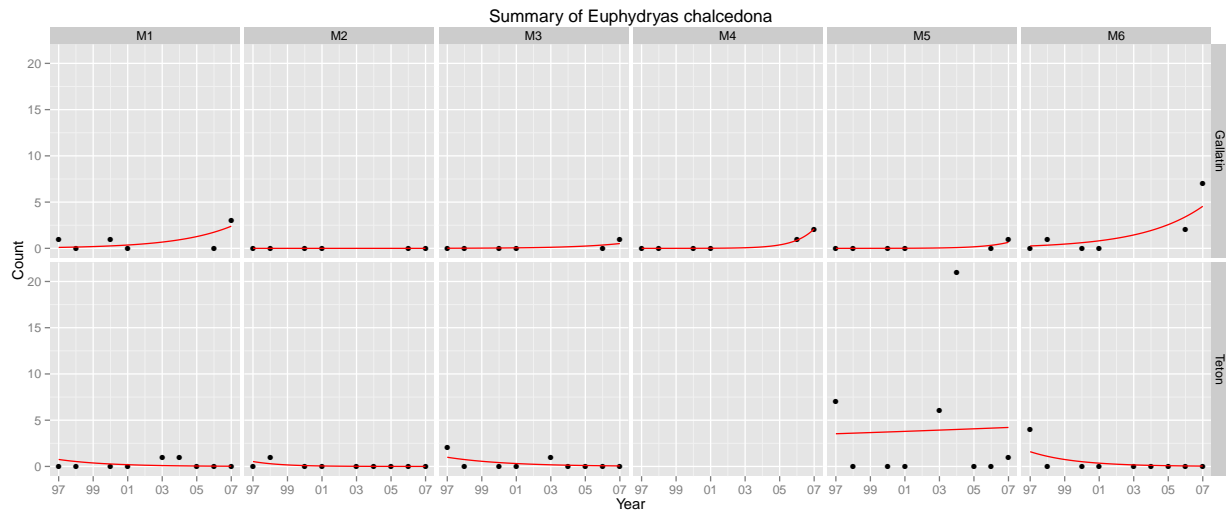

Figure C21: Time series plot of Euphydryas chalcedona by region and meadow type

# Euphydryas chalcedona

Table C42: Poisson regression parameter estimates for Euphydryas chalcedona

|                         | Estimate | Std. Error | z value | P-value |
|-------------------------|----------|------------|---------|---------|
| (Intercept)             | -0.2841  | 0.8068     | -0.35   | 0.7248  |
| Year                    | -0.3475  | 0.1940     | -1.79   | 0.0733  |
| MeadowM2                | -0.3493  | 1.4282     | -0.24   | 0.8068  |
| MeadowM3                | 0.2754   | 1.0752     | 0.26    | 0.7979  |
| MeadowM4                | -5.6199  | 8.5362     | -0.66   | 0.5103  |
| MeadowM5                | 1.5467   | 0.8705     | 1.78    | 0.0756  |
| MeadowM6                | 0.7497   | 0.9296     | 0.81    | 0.4199  |
| RegionGallatin          | -2.0029  | 1.3973     | -1.43   | 0.1517  |
| Year:MeadowM2           | -0.2409  | 0.6529     | -0.37   | 0.7122  |
| Year:MeadowM3           | 0.0591   | 0.2564     | 0.23    | 0.8176  |
| Year:MeadowM4           | 0.5489   | 0.8830     | 0.62    | 0.5342  |
| Year:MeadowM5           | 0.3651   | 0.2003     | 1.82    | 0.0684  |
| Year:MeadowM6           | -0.0296  | 0.1734     | -0.17   | 0.8646  |
| Year:RegionGallatin     | 0.6635   | 0.1759     | 3.77    | 0.0002  |
| MeadowM2:RegionGallatin | -15.0003 | 1384.1485  | -0.01   | 0.9914  |
| MeadowM3:RegionGallatin | -2.3929  | 2.1889     | -1.09   | 0.2743  |
| MeadowM5:RegionGallatin | -6.4984  | 1.9197     | -3.39   | 0.0007  |
| MeadowM6:RegionGallatin | 0.1884   | 1.5093     | 0.12    | 0.9006  |

## 22 *Lycaeides melissa*

Table C43: Poisson regression fitted models for *Lycaeides melissa*

|    | Region   | Meadow | Model                                 | Sig |
|----|----------|--------|---------------------------------------|-----|
| 1  | Teton    | M1     | $\hat{Y} = 0e^{0.067(YEAR-1997)}$     |     |
| 2  | Teton    | M2     | $\hat{Y} = 0.027e^{0.22(YEAR-1997)}$  |     |
| 3  | Teton    | M3     | $\hat{Y} = 3.616e^{0.065(YEAR-1997)}$ |     |
| 5  | Teton    | M5     | $\hat{Y} = 0.993e^{0.078(YEAR-1997)}$ |     |
| 6  | Teton    | M6     | $\hat{Y} = 0e^{0.105(YEAR-1997)}$     |     |
| 7  | Gallatin | M1     | $\hat{Y} = 1.033e^{0.108(YEAR-1997)}$ |     |
| 8  | Gallatin | M2     | $\hat{Y} = 0.223e^{0.261(YEAR-1997)}$ |     |
| 9  | Gallatin | M3     | $\hat{Y} = 1.241e^{0.106(YEAR-1997)}$ |     |
| 10 | Gallatin | M4     | $\hat{Y} = 1.543e^{0.178(YEAR-1997)}$ |     |
| 11 | Gallatin | M5     | $\hat{Y} = 0.967e^{0.119(YEAR-1997)}$ |     |
| 12 | Gallatin | M6     | $\hat{Y} = 1.769e^{0.146(YEAR-1997)}$ |     |

Null deviance: 290.531 on 80 degrees of freedom  
Residual deviance: 98.849 on 63 degrees of freedom  
(51 observations deleted due to missingness)  
AIC: 255.00

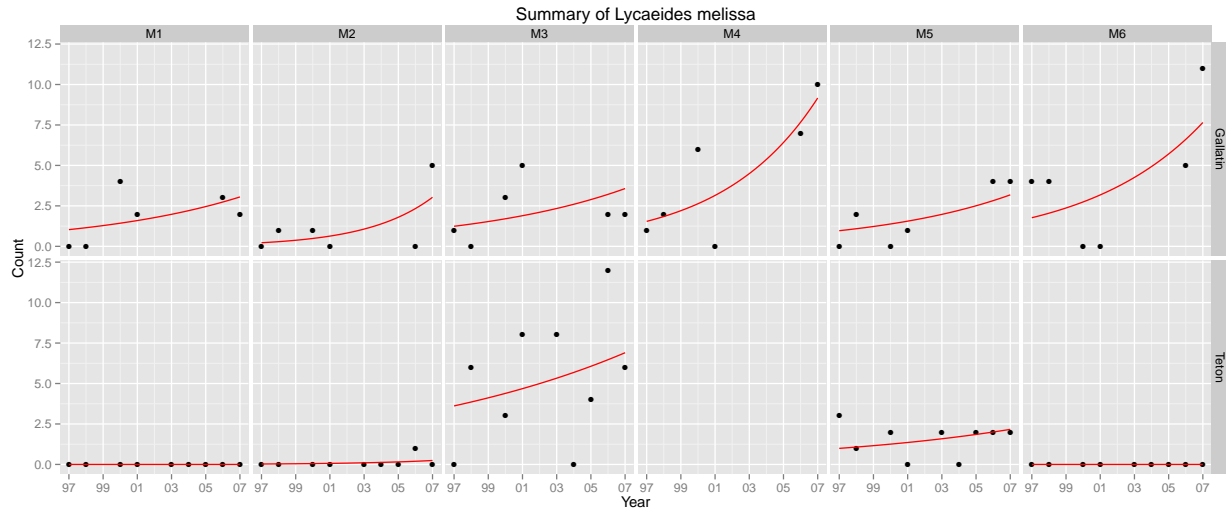

Figure C22: Time series plot of *Lycaeides melissa* by region and meadow type



# Lycaeides melissa

Table C44: Poisson regression parameter estimates for Lycaeides melissa

|                         | Estimate | Std. Error | z value | P-value |
|-------------------------|----------|------------|---------|---------|
| (Intercept)             | -18.6606 | 1881.7304  | -0.01   | 0.9921  |
| Year                    | 0.0673   | 0.1046     | 0.64    | 0.5199  |
| MeadowM2                | 15.0480  | 1881.7308  | 0.01    | 0.9936  |
| MeadowM3                | 19.9460  | 1881.7304  | 0.01    | 0.9915  |
| MeadowM4                | 0.4011   | 0.7179     | 0.56    | 0.5764  |
| MeadowM5                | 18.6531  | 1881.7304  | 0.01    | 0.9921  |
| MeadowM6                | -0.2316  | 2656.8463  | -0.00   | 0.9999  |
| RegionGallatin          | 18.6931  | 1881.7304  | 0.01    | 0.9921  |
| Year:MeadowM2           | 0.1526   | 0.1421     | 1.07    | 0.2827  |
| Year:MeadowM3           | -0.0026  | 0.1010     | -0.03   | 0.9791  |
| Year:MeadowM4           | 0.0698   | 0.0968     | 0.72    | 0.4709  |
| Year:MeadowM5           | 0.0108   | 0.1035     | 0.10    | 0.9171  |
| Year:MeadowM6           | 0.0381   | 0.0969     | 0.39    | 0.6940  |
| Year:RegionGallatin     | 0.0411   | 0.0681     | 0.60    | 0.5463  |
| MeadowM2:RegionGallatin | -16.5815 | 1881.7306  | -0.01   | 0.9930  |
| MeadowM3:RegionGallatin | -19.7629 | 1881.7303  | -0.01   | 0.9916  |
| MeadowM5:RegionGallatin | -18.7196 | 1881.7304  | -0.01   | 0.9921  |
| MeadowM6:RegionGallatin | 0.7693   | 2656.8463  | 0.00    | 0.9998  |

## 23 Plebejus icarioides

Table C45: Poisson regression fitted models for *Plebejus icarioides*

|    | Region   | Meadow | Model                                   | Sig |
|----|----------|--------|-----------------------------------------|-----|
| 1  | Teton    | M1     | $\hat{Y} = 5.964e^{-0.006(YEAR-1997)}$  |     |
| 2  | Teton    | M2     | $\hat{Y} = 3.354e^{0.011(YEAR-1997)}$   |     |
| 3  | Teton    | M3     | $\hat{Y} = 14.54e^{0.034(YEAR-1997)}$   | *** |
| 5  | Teton    | M5     | $\hat{Y} = 73.834e^{0.008(YEAR-1997)}$  | *** |
| 6  | Teton    | M6     | $\hat{Y} = 34.259e^{0.034(YEAR-1997)}$  | *** |
| 7  | Gallatin | M1     | $\hat{Y} = 6.039e^{-0.063(YEAR-1997)}$  | *** |
| 8  | Gallatin | M2     | $\hat{Y} = 9.517e^{-0.047(YEAR-1997)}$  | *** |
| 9  | Gallatin | M3     | $\hat{Y} = 7.744e^{-0.023(YEAR-1997)}$  | *** |
| 10 | Gallatin | M4     | $\hat{Y} = 55.381e^{-0.065(YEAR-1997)}$ | *** |
| 11 | Gallatin | M5     | $\hat{Y} = 41.582e^{-0.05(YEAR-1997)}$  | *** |
| 12 | Gallatin | M6     | $\hat{Y} = 27.802e^{-0.023(YEAR-1997)}$ | *** |

Null deviance: 2108.47 on 80 degrees of freedom

Residual deviance: 461.07 on 63 degrees of freedom

(51 observations deleted due to missingness)

AIC: 850.51

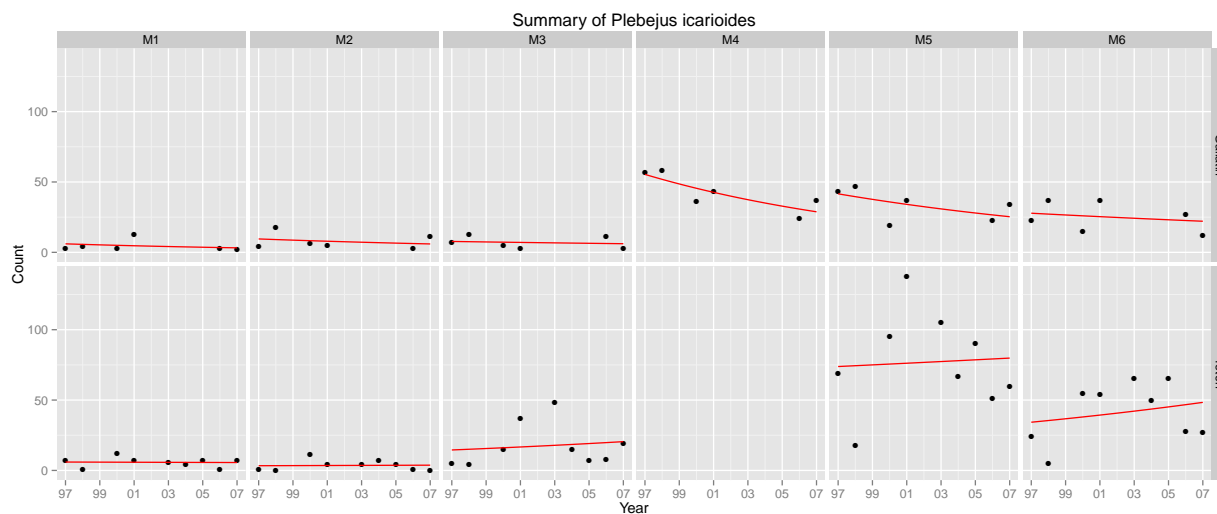

Figure C23: Time series plot of *Plebejus icarioides* by region and meadow type

# Plebejus icarioides

Table C46: Poisson regression parameter estimates for *Plebejus icarioides*

|                         | Estimate | Std. Error | z value | P-value |
|-------------------------|----------|------------|---------|---------|
| (Intercept)             | 1.7857   | 0.2236     | 7.99    | 0.0000  |
| Year                    | -0.0060  | 0.0333     | -0.18   | 0.8574  |
| MeadowM2                | -0.5755  | 0.3341     | -1.72   | 0.0850  |
| MeadowM3                | 0.8912   | 0.2642     | 3.37    | 0.0007  |
| MeadowM4                | 2.2161   | 0.2436     | 9.10    | 0.0000  |
| MeadowM5                | 2.5161   | 0.2312     | 10.88   | 0.0000  |
| MeadowM6                | 1.7482   | 0.2390     | 7.32    | 0.0000  |
| RegionGallatin          | 0.0124   | 0.2492     | 0.05    | 0.9602  |
| Year:MeadowM2           | 0.0168   | 0.0461     | 0.36    | 0.7159  |
| Year:MeadowM3           | 0.0401   | 0.0390     | 1.03    | 0.3033  |
| Year:MeadowM4           | -0.0019  | 0.0385     | -0.05   | 0.9601  |
| Year:MeadowM5           | 0.0138   | 0.0343     | 0.40    | 0.6876  |
| Year:MeadowM6           | 0.0405   | 0.0352     | 1.15    | 0.2506  |
| Year:RegionGallatin     | -0.0574  | 0.0154     | -3.72   | 0.0002  |
| MeadowM2:RegionGallatin | 1.0304   | 0.3362     | 3.07    | 0.0022  |
| MeadowM3:RegionGallatin | -0.6424  | 0.2983     | -2.15   | 0.0312  |
| MeadowM5:RegionGallatin | -0.5866  | 0.2537     | -2.31   | 0.0208  |
| MeadowM6:RegionGallatin | -0.2213  | 0.2598     | -0.85   | 0.3943  |

## 24 Plebejus lupini

Table C47: Poisson regression fitted models for Plebejus lupini

|    | Region   | Meadow | Model                                  | Sig |
|----|----------|--------|----------------------------------------|-----|
| 1  | Teton    | M1     | $\hat{Y} = 1.095e^{-0.069(YEAR-1997)}$ |     |
| 2  | Teton    | M2     | $\hat{Y} = 0.077e^{0.17(YEAR-1997)}$   |     |
| 3  | Teton    | M3     | $\hat{Y} = 3.815e^{0.072(YEAR-1997)}$  | *** |
| 5  | Teton    | M5     | $\hat{Y} = 6.541e^{0.004(YEAR-1997)}$  | *** |
| 6  | Teton    | M6     | $\hat{Y} = 2.971e^{0.177(YEAR-1997)}$  | *** |
| 7  | Gallatin | M1     | $\hat{Y} = 1.367e^{-0.137(YEAR-1997)}$ |     |
| 8  | Gallatin | M2     | $\hat{Y} = 0.195e^{0.102(YEAR-1997)}$  |     |
| 9  | Gallatin | M3     | $\hat{Y} = 0.98e^{0.005(YEAR-1997)}$   | *** |
| 10 | Gallatin | M4     | $\hat{Y} = 1.419e^{-0.047(YEAR-1997)}$ |     |
| 11 | Gallatin | M5     | $\hat{Y} = 2.597e^{-0.064(YEAR-1997)}$ | *** |
| 12 | Gallatin | M6     | $\hat{Y} = 0.746e^{0.11(YEAR-1997)}$   | *** |

Null deviance: 501.90 on 80 degrees of freedom

Residual deviance: 227.01 on 63 degrees of freedom

(51 observations deleted due to missingness)

AIC: 418.18

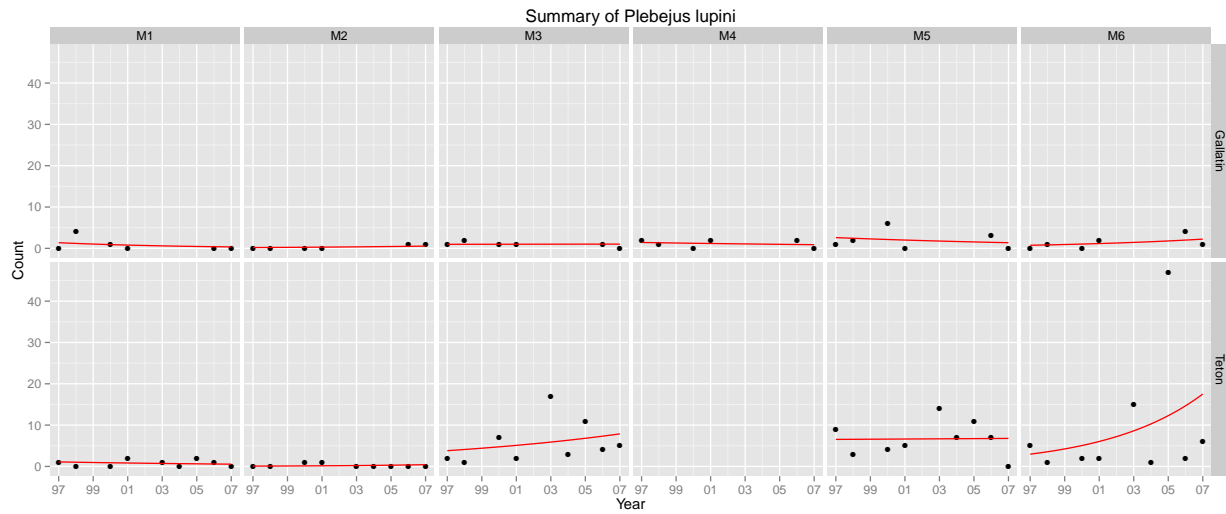

Figure C24: Time series plot of Plebejus lupini by region and meadow type

# Plebejus lupini

Table C48: Poisson regression parameter estimates for *Plebejus lupini*

|                         | Estimate | Std. Error | z value | P-value |
|-------------------------|----------|------------|---------|---------|
| (Intercept)             | 0.0909   | 0.5604     | 0.16    | 0.8712  |
| Year                    | -0.0692  | 0.0909     | -0.76   | 0.4462  |
| MeadowM2                | -2.6499  | 1.3817     | -1.92   | 0.0551  |
| MeadowM3                | 1.2482   | 0.6223     | 2.01    | 0.0449  |
| MeadowM4                | 0.0376   | 0.7599     | 0.05    | 0.9606  |
| MeadowM5                | 1.7872   | 0.5990     | 2.98    | 0.0028  |
| MeadowM6                | 0.9979   | 0.6199     | 1.61    | 0.1074  |
| RegionGallatin          | 0.2218   | 0.6345     | 0.35    | 0.7266  |
| Year:MeadowM2           | 0.2391   | 0.1734     | 1.38    | 0.1681  |
| Year:MeadowM3           | 0.1417   | 0.0981     | 1.44    | 0.1486  |
| Year:MeadowM4           | 0.0901   | 0.1411     | 0.64    | 0.5231  |
| Year:MeadowM5           | 0.0728   | 0.0957     | 0.76    | 0.4472  |
| Year:MeadowM6           | 0.2467   | 0.0964     | 2.56    | 0.0105  |
| Year:RegionGallatin     | -0.0679  | 0.0547     | -1.24   | 0.2142  |
| MeadowM2:RegionGallatin | 0.7038   | 1.1909     | 0.59    | 0.5546  |
| MeadowM3:RegionGallatin | -1.5815  | 0.7490     | -2.11   | 0.0347  |
| MeadowM5:RegionGallatin | -1.1456  | 0.6860     | -1.67   | 0.0949  |
| MeadowM6:RegionGallatin | -1.6038  | 0.7264     | -2.21   | 0.0273  |

# 25 Speyeria atlantis hesperis

Table C49: Poisson regression fitted models for *Speyeria atlantis hesperis*

|    | Region   | Meadow | Model                                 | Sig |
|----|----------|--------|---------------------------------------|-----|
| 1  | Teton    | M1     | $\hat{Y} = 0e^{1.483(YEAR-1997)}$     |     |
| 2  | Teton    | M2     | $\hat{Y} = 0e^{1.515(YEAR-1997)}$     |     |
| 3  | Teton    | M3     | $\hat{Y} = 0e^{1.437(YEAR-1997)}$     |     |
| 5  | Teton    | M5     | $\hat{Y} = 0e^{1.62(YEAR-1997)}$      |     |
| 6  | Teton    | M6     | $\hat{Y} = 0e^{1.435(YEAR-1997)}$     |     |
| 7  | Gallatin | M1     | $\hat{Y} = 4.361e^{0.048(YEAR-1997)}$ | *** |
| 8  | Gallatin | M2     | $\hat{Y} = 1.002e^{0.079(YEAR-1997)}$ | *** |
| 9  | Gallatin | M3     | $\hat{Y} = 6.285e^{0.002(YEAR-1997)}$ | *** |
| 10 | Gallatin | M4     | $\hat{Y} = 0.091e^{0.267(YEAR-1997)}$ | *** |
| 11 | Gallatin | M5     | $\hat{Y} = 0.226e^{0.185(YEAR-1997)}$ | *** |
| 12 | Gallatin | M6     | $\hat{Y} = 1.333e^{0(YEAR-1997)}$     | *** |

Null deviance: 283.99 on 80 degrees of freedom  
Residual deviance: 64.66 on 63 degrees of freedom  
(51 observations deleted due to missingness)  
AIC: 181.5

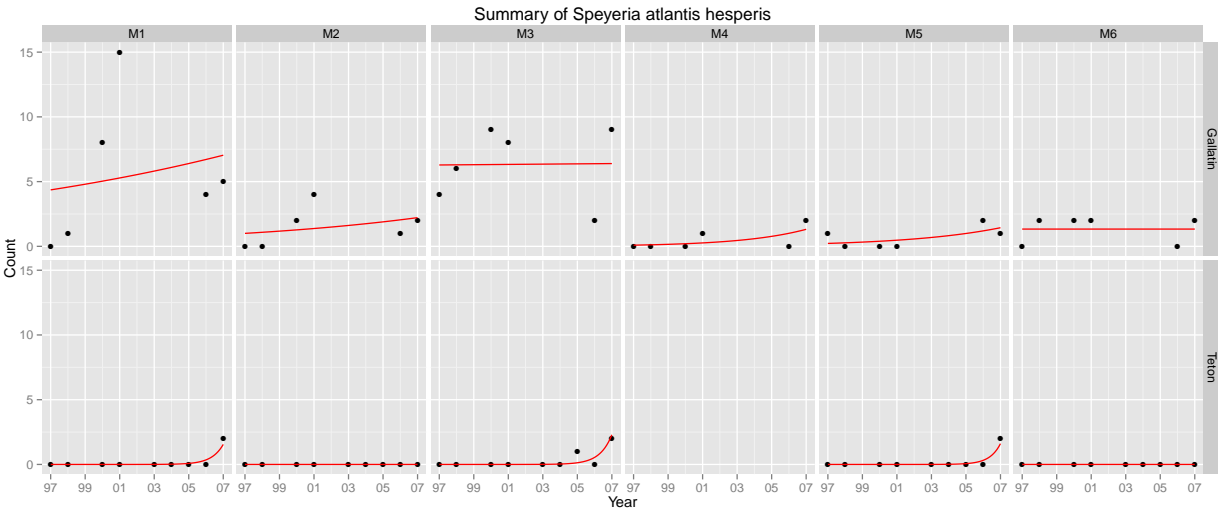

Figure C25: Time series plot of *Speyeria atlantis hesperis* by region and meadow type

# Speyeria atlantis hesperis

Table C50: Poisson regression parameter estimates for *Speyeria atlantis hesperis*

|                         | Estimate | Std. Error | z value | P-value |
|-------------------------|----------|------------|---------|---------|
| (Intercept)             | -14.3968 | 6.1649     | -2.34   | 0.0195  |
| Year                    | 1.4833   | 0.6308     | 2.35    | 0.0187  |
| MeadowM2                | -17.3451 | 2149.6810  | -0.01   | 0.9936  |
| MeadowM3                | 0.8533   | 1.0947     | 0.78    | 0.4357  |
| MeadowM4                | -3.8683  | 1.6637     | -2.33   | 0.0201  |
| MeadowM5                | -1.3342  | 1.7627     | -0.76   | 0.4491  |
| MeadowM6                | -16.5399 | 2112.4541  | -0.01   | 0.9938  |
| RegionGallatin          | 15.8695  | 6.1600     | 2.58    | 0.0100  |
| Year:MeadowM2           | 0.0315   | 0.0978     | 0.32    | 0.7474  |
| Year:MeadowM3           | -0.0462  | 0.0623     | -0.74   | 0.4584  |
| Year:MeadowM4           | 0.2191   | 0.1968     | 1.11    | 0.2658  |
| Year:MeadowM5           | 0.1371   | 0.1490     | 0.92    | 0.3575  |
| Year:MeadowM6           | -0.0479  | 0.1040     | -0.46   | 0.6452  |
| Year:RegionGallatin     | -1.4354  | 0.6301     | -2.28   | 0.0227  |
| MeadowM2:RegionGallatin | 15.8748  | 2149.6809  | 0.01    | 0.9941  |
| MeadowM3:RegionGallatin | -0.4879  | 0.9903     | -0.49   | 0.6223  |
| MeadowM5:RegionGallatin | -1.6247  | 1.2088     | -1.34   | 0.1789  |
| MeadowM6:RegionGallatin | 15.3549  | 2112.4540  | 0.01    | 0.9942  |

# 26 Euphydryas editha

Table C51: Poisson regression fitted models for Euphydryas editha

|    | Region   | Meadow | Model                                 | Sig |
|----|----------|--------|---------------------------------------|-----|
| 1  | Teton    | M1     | $\hat{Y} = 0e^{-0.12(YEAR-1997)}$     |     |
| 2  | Teton    | M2     | $\hat{Y} = 0e^{-0.12(YEAR-1997)}$     |     |
| 3  | Teton    | M3     | $\hat{Y} = 0.007e^{0.391(YEAR-1997)}$ |     |
| 5  | Teton    | M5     | $\hat{Y} = 0.37e^{0.232(YEAR-1997)}$  |     |
| 6  | Teton    | M6     | $\hat{Y} = 0.226e^{0.214(YEAR-1997)}$ |     |
| 7  | Gallatin | M1     | $\hat{Y} = 1.04e^{-0.12(YEAR-1997)}$  |     |
| 8  | Gallatin | M2     | $\hat{Y} = 0.26e^{-0.12(YEAR-1997)}$  |     |
| 9  | Gallatin | M3     | $\hat{Y} = 0.021e^{0.391(YEAR-1997)}$ |     |
| 10 | Gallatin | M4     | $\hat{Y} = 0.039e^{0.425(YEAR-1997)}$ | *** |
| 11 | Gallatin | M5     | $\hat{Y} = 0e^{0.232(YEAR-1997)}$     |     |
| 12 | Gallatin | M6     | $\hat{Y} = 0.229e^{0.214(YEAR-1997)}$ |     |

Null deviance: 156.150 on 80 degrees of freedom  
Residual deviance: 80.779 on 63 degrees of freedom  
(51 observations deleted due to missingness)  
AIC: 157.44

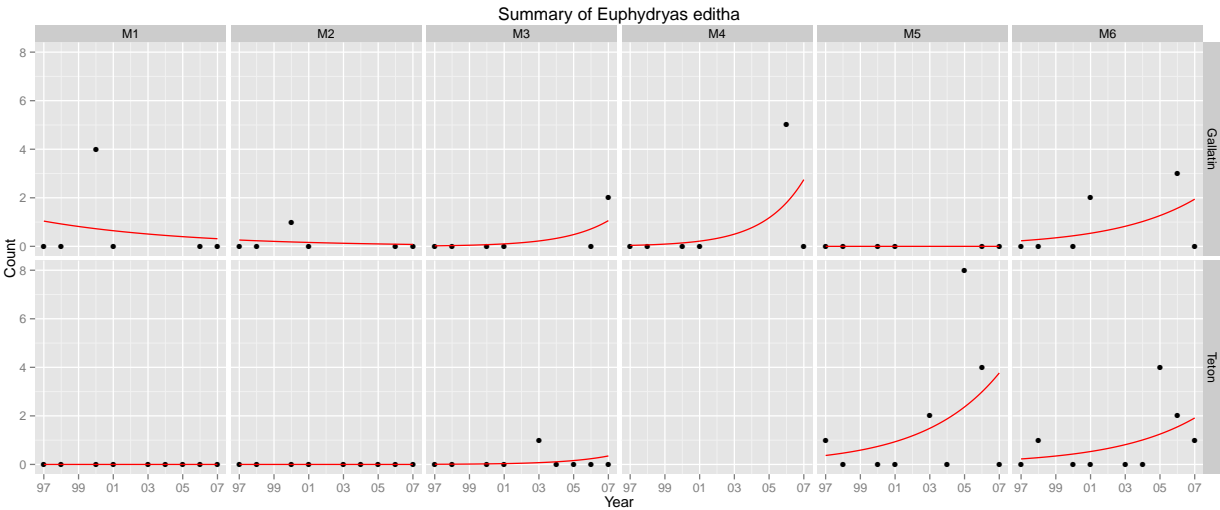

Figure C26: Time series plot of Euphydryas editha by region and meadow type



# Euphydryas editha

Table C52: Poisson regression parameter estimates for Euphydryas editha

|                         | Estimate | Std. Error | z value | P-value |
|-------------------------|----------|------------|---------|---------|
| (Intercept)             | -18.5721 | 2883.7786  | -0.01   | 0.9949  |
| Year                    | -0.1199  | 0.2366     | -0.51   | 0.6123  |
| MeadowM2                | -0.1261  | 4213.0209  | -0.00   | 1.0000  |
| MeadowM3                | 13.6133  | 2883.7795  | 0.00    | 0.9962  |
| MeadowM4                | -3.2774  | 2.1628     | -1.52   | 0.1297  |
| MeadowM5                | 17.5765  | 2883.7787  | 0.01    | 0.9951  |
| MeadowM6                | 17.0856  | 2883.7786  | 0.01    | 0.9953  |
| RegionGallatin          | 18.6112  | 2883.7785  | 0.01    | 0.9949  |
| Year:MeadowM2           | -0.0000  | 0.3458     | -0.00   | 1.0000  |
| Year:MeadowM3           | 0.5106   | 0.3151     | 1.62    | 0.1051  |
| Year:MeadowM4           | 0.5447   | 0.2710     | 2.01    | 0.0444  |
| Year:MeadowM5           | 0.3521   | 0.2566     | 1.37    | 0.1700  |
| Year:MeadowM6           | 0.3335   | 0.2024     | 1.65    | 0.0994  |
| Year:RegionGallatin     | 0.0002   | 0.1791     | 0.00    | 0.9993  |
| MeadowM2:RegionGallatin | -1.2602  | 4213.0208  | -0.00   | 0.9998  |
| MeadowM3:RegionGallatin | -17.5022 | 2883.7788  | -0.01   | 0.9952  |
| MeadowM5:RegionGallatin | -38.0473 | 4388.9182  | -0.01   | 0.9931  |
| MeadowM6:RegionGallatin | -18.5978 | 2883.7786  | -0.01   | 0.9949  |

27 *Nymphalis antiopa*

Table C53: Poisson regression fitted models for *Nymphalis antiopa*

|    | Region   | Meadow | Model                                  | Sig |
|----|----------|--------|----------------------------------------|-----|
| 1  | Teton    | M1     | $\hat{Y} = 0.273e^{-0.218(YEAR-1997)}$ |     |
| 2  | Teton    | M2     | $\hat{Y} = 1e^{-19.215(YEAR-1997)}$    |     |
| 3  | Teton    | M3     | $\hat{Y} = 0.269e^{0.087(YEAR-1997)}$  |     |
| 5  | Teton    | M5     | $\hat{Y} = 0e^{0.825(YEAR-1997)}$      |     |
| 6  | Teton    | M6     | $\hat{Y} = 1e^{-19.525(YEAR-1997)}$    |     |
| 7  | Gallatin | M1     | $\hat{Y} = 1e^{-18.725(YEAR-1997)}$    |     |
| 8  | Gallatin | M2     | $\hat{Y} = 2e^{-37.722(YEAR-1997)}$    |     |
| 9  | Gallatin | M3     | $\hat{Y} = 0e^{-18.42(YEAR-1997)}$     |     |
| 10 | Gallatin | M4     | $\hat{Y} = 0e^{20.543(YEAR-1997)}$     |     |
| 11 | Gallatin | M5     | $\hat{Y} = 0e^{-17.682(YEAR-1997)}$    |     |
| 12 | Gallatin | M6     | $\hat{Y} = 0e^{-38.031(YEAR-1997)}$    |     |

Null deviance: 49.469 on 80 degrees of freedom  
Residual deviance: 12.851 on 63 degrees of freedom  
(51 observations deleted due to missingness)  
AIC: 68.078

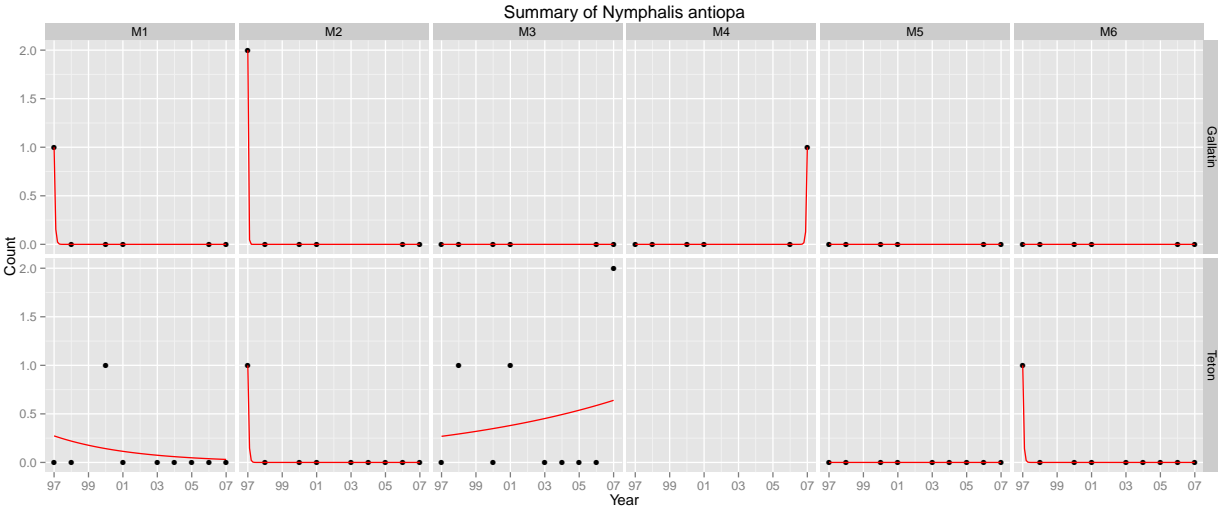

Figure C27: Time series plot of *Nymphalis antiopa* by region and meadow type

# Nymphalis antiopa

Table C54: Poisson regression parameter estimates for Nymphalis antiopa

|                         | Estimate  | Std. Error  | z value | P-value |
|-------------------------|-----------|-------------|---------|---------|
| (Intercept)             | -1.2971   | 1.4080      | -0.92   | 0.3569  |
| Year                    | -0.2180   | 0.3304      | -0.66   | 0.5094  |
| MeadowM2                | 1.2971    | 1.7269      | 0.75    | 0.4526  |
| MeadowM3                | -0.0164   | 1.7943      | -0.01   | 0.9927  |
| MeadowM4                | -205.4339 | 175304.7097 | -0.00   | 0.9991  |
| MeadowM5                | -30.3720  | 477261.7548 | -0.00   | 0.9999  |
| MeadowM6                | 1.2971    | 1.7269      | 0.75    | 0.4526  |
| RegionGallatin          | 1.2971    | 1.7269      | 0.75    | 0.4526  |
| Year:MeadowM2           | -18.9974  | 9024.2335   | -0.00   | 0.9983  |
| Year:MeadowM3           | 0.3046    | 0.3666      | 0.83    | 0.4060  |
| Year:MeadowM4           | 39.2680   | 18898.9185  | 0.00    | 0.9983  |
| Year:MeadowM5           | 1.0428    | 51160.3350  | 0.00    | 1.0000  |
| Year:MeadowM6           | -19.3067  | 10533.8377  | -0.00   | 0.9985  |
| Year:RegionGallatin     | -18.5066  | 7060.5743   | -0.00   | 0.9979  |
| MeadowM2:RegionGallatin | -0.6039   | 2.1172      | -0.29   | 0.7754  |
| MeadowM3:RegionGallatin | -22.4689  | 46289.0888  | -0.00   | 0.9996  |
| MeadowM5:RegionGallatin | 7.5025    | 480545.7573 | 0.00    | 1.0000  |
| MeadowM6:RegionGallatin | -23.8568  | 48045.1495  | -0.00   | 0.9996  |

## 28 Erebia epipsodea

Table C55: Poisson regression fitted models for *Erebia epipsodea*

|    | Region   | Meadow | Model                                   | Sig |
|----|----------|--------|-----------------------------------------|-----|
| 1  | Teton    | M1     | $\hat{Y} = 7.624e^{0.058(YEAR-1997)}$   |     |
| 2  | Teton    | M2     | $\hat{Y} = 33.16e^{0.016(YEAR-1997)}$   | *** |
| 3  | Teton    | M3     | $\hat{Y} = 16.464e^{-0.011(YEAR-1997)}$ | *** |
| 5  | Teton    | M5     | $\hat{Y} = 3.924e^{0.054(YEAR-1997)}$   | *** |
| 6  | Teton    | M6     | $\hat{Y} = 1.242e^{0.04(YEAR-1997)}$    | *** |
| 7  | Gallatin | M1     | $\hat{Y} = 29.502e^{-0.006(YEAR-1997)}$ | *** |
| 8  | Gallatin | M2     | $\hat{Y} = 48.203e^{-0.048(YEAR-1997)}$ | *** |
| 9  | Gallatin | M3     | $\hat{Y} = 19.994e^{-0.075(YEAR-1997)}$ | *** |
| 10 | Gallatin | M4     | $\hat{Y} = 10.357e^{-0.064(YEAR-1997)}$ | *** |
| 11 | Gallatin | M5     | $\hat{Y} = 11.302e^{-0.01(YEAR-1997)}$  | *** |
| 12 | Gallatin | M6     | $\hat{Y} = 8.861e^{-0.024(YEAR-1997)}$  | *** |

Null deviance: 1293.6 on 80 degrees of freedom

Residual deviance: 535.9 on 63 degrees of freedom

(51 observations deleted due to missingness)

AIC: 886.97

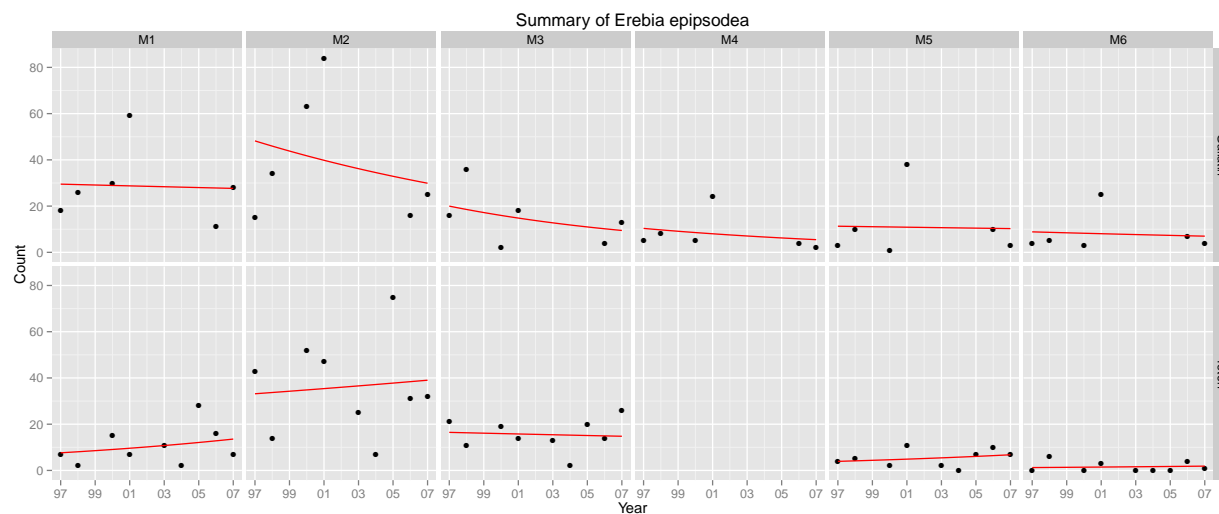

Figure C28: Time series plot of *Erebia epipsodea* by region and meadow type

# Erebia epipsodea

Table C56: Poisson regression parameter estimates for *Erebia epipsodea*

|                         | Estimate | Std. Error | z value | P-value |
|-------------------------|----------|------------|---------|---------|
| (Intercept)             | 2.0313   | 0.1616     | 12.57   | 0.0000  |
| Year                    | 0.0576   | 0.0210     | 2.75    | 0.0060  |
| MeadowM2                | 1.4700   | 0.1714     | 8.58    | 0.0000  |
| MeadowM3                | 0.7699   | 0.1991     | 3.87    | 0.0001  |
| MeadowM4                | -1.0468  | 0.2345     | -4.46   | 0.0000  |
| MeadowM5                | -0.6642  | 0.2580     | -2.57   | 0.0101  |
| MeadowM6                | -1.8143  | 0.3656     | -4.96   | 0.0000  |
| RegionGallatin          | 1.3531   | 0.1608     | 8.41    | 0.0000  |
| Year:MeadowM2           | -0.0413  | 0.0215     | -1.92   | 0.0543  |
| Year:MeadowM3           | -0.0684  | 0.0264     | -2.59   | 0.0096  |
| Year:MeadowM4           | -0.0571  | 0.0446     | -1.28   | 0.2001  |
| Year:MeadowM5           | -0.0031  | 0.0316     | -0.10   | 0.9218  |
| Year:MeadowM6           | -0.0171  | 0.0392     | -0.44   | 0.6617  |
| Year:RegionGallatin     | -0.0641  | 0.0170     | -3.76   | 0.0002  |
| MeadowM2:RegionGallatin | -0.9791  | 0.1580     | -6.20   | 0.0000  |
| MeadowM3:RegionGallatin | -1.1589  | 0.1924     | -6.02   | 0.0000  |
| MeadowM5:RegionGallatin | -0.2953  | 0.2345     | -1.26   | 0.2080  |
| MeadowM6:RegionGallatin | 0.6115   | 0.3354     | 1.82    | 0.0682  |

## 29 Agriades glandon

Table C57: Poisson regression fitted models for Agriades glandon

|    | Region   | Meadow | Model                                  | Sig |
|----|----------|--------|----------------------------------------|-----|
| 1  | Teton    | M1     | $\hat{Y} = 0.156e^{-0.068(YEAR-1997)}$ |     |
| 2  | Teton    | M2     | $\hat{Y} = 0.174e^{0.11(YEAR-1997)}$   |     |
| 3  | Teton    | M3     | $\hat{Y} = 2.362e^{0.049(YEAR-1997)}$  | *** |
| 5  | Teton    | M5     | $\hat{Y} = 3.821e^{-0.243(YEAR-1997)}$ | *** |
| 6  | Teton    | M6     | $\hat{Y} = 0.151e^{-0.061(YEAR-1997)}$ |     |
| 7  | Gallatin | M1     | $\hat{Y} = 0.833e^{0.067(YEAR-1997)}$  |     |
| 8  | Gallatin | M2     | $\hat{Y} = 0.252e^{0.246(YEAR-1997)}$  |     |
| 9  | Gallatin | M3     | $\hat{Y} = 0.34e^{0.185(YEAR-1997)}$   | *** |
| 10 | Gallatin | M4     | $\hat{Y} = 2.235e^{-0.145(YEAR-1997)}$ |     |
| 11 | Gallatin | M5     | $\hat{Y} = 1.753e^{-0.108(YEAR-1997)}$ | *** |
| 12 | Gallatin | M6     | $\hat{Y} = 0.459e^{0.074(YEAR-1997)}$  |     |

Null deviance: 187.48 on 80 degrees of freedom

Residual deviance: 109.33 on 63 degrees of freedom

(51 observations deleted due to missingness)

AIC: 238.71

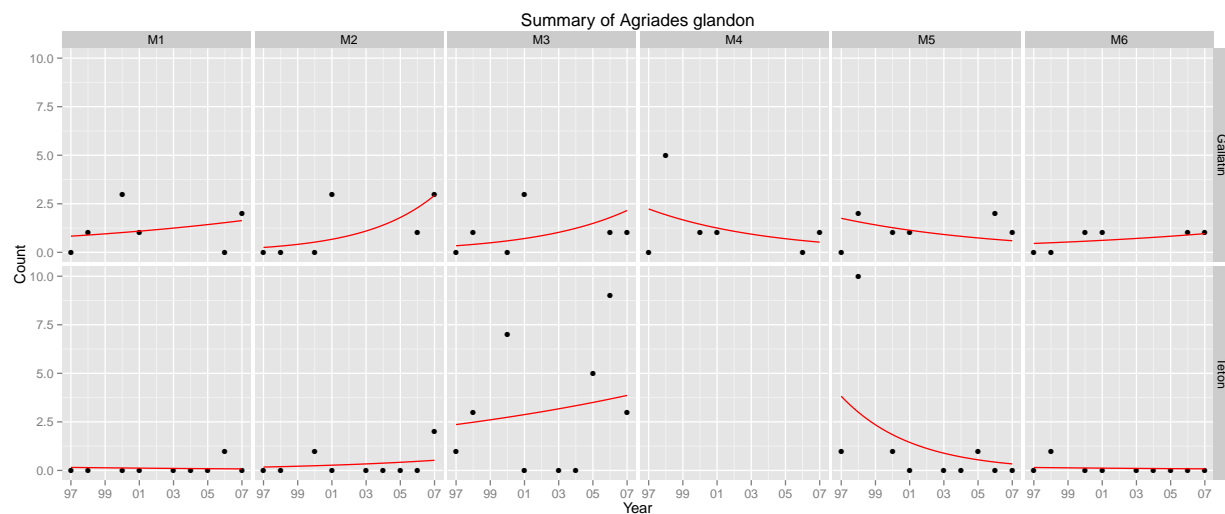

Figure C29: Time series plot of Agriades glandon by region and meadow type

# Agriades glandon

Table C58: Poisson regression parameter estimates for Agriades glandon

|                         | Estimate | Std. Error | z value | P-value |
|-------------------------|----------|------------|---------|---------|
| (Intercept)             | -1.8600  | 1.1396     | -1.63   | 0.1027  |
| Year                    | -0.0681  | 0.1197     | -0.57   | 0.5693  |
| MeadowM2                | 0.1106   | 1.3944     | 0.08    | 0.9368  |
| MeadowM3                | 2.7194   | 1.1706     | 2.32    | 0.0202  |
| MeadowM4                | 0.9868   | 0.7942     | 1.24    | 0.2141  |
| MeadowM5                | 3.2006   | 1.1666     | 2.74    | 0.0061  |
| MeadowM6                | -0.0307  | 1.5769     | -0.02   | 0.9844  |
| RegionGallatin          | 1.6773   | 1.1405     | 1.47    | 0.1414  |
| Year:MeadowM2           | 0.1780   | 0.1384     | 1.29    | 0.1983  |
| Year:MeadowM3           | 0.1173   | 0.1217     | 0.96    | 0.3351  |
| Year:MeadowM4           | -0.2123  | 0.1479     | -1.44   | 0.1512  |
| Year:MeadowM5           | -0.1751  | 0.1253     | -1.40   | 0.1624  |
| Year:MeadowM6           | 0.0067   | 0.1513     | 0.04    | 0.9648  |
| Year:RegionGallatin     | 0.1356   | 0.0833     | 1.63    | 0.1036  |
| MeadowM2:RegionGallatin | -1.3070  | 1.2953     | -1.01   | 0.3130  |
| MeadowM3:RegionGallatin | -3.6162  | 1.1794     | -3.07   | 0.0022  |
| MeadowM5:RegionGallatin | -2.4566  | 1.1790     | -2.08   | 0.0372  |
| MeadowM6:RegionGallatin | -0.5659  | 1.5534     | -0.36   | 0.7157  |

30 *Colias pelidne*

Table C59: Poisson regression fitted models for *Colias pelidne*

|    | Region   | Meadow | Model                                  | Sig |
|----|----------|--------|----------------------------------------|-----|
| 1  | Teton    | M1     | $\hat{Y} = 0.718e^{-0.051(YEAR-1997)}$ |     |
| 2  | Teton    | M2     | $\hat{Y} = 0.479e^{-0.014(YEAR-1997)}$ |     |
| 3  | Teton    | M3     | $\hat{Y} = 0.422e^{0.079(YEAR-1997)}$  |     |
| 5  | Teton    | M5     | $\hat{Y} = 0.802e^{0.058(YEAR-1997)}$  |     |
| 6  | Teton    | M6     | $\hat{Y} = 0.015e^{0.299(YEAR-1997)}$  |     |
| 7  | Gallatin | M1     | $\hat{Y} = 0.246e^{0.13(YEAR-1997)}$   |     |
| 8  | Gallatin | M2     | $\hat{Y} = 0.387e^{0.166(YEAR-1997)}$  |     |
| 9  | Gallatin | M3     | $\hat{Y} = 0.032e^{0.26(YEAR-1997)}$   |     |
| 10 | Gallatin | M4     | $\hat{Y} = 0.121e^{0.267(YEAR-1997)}$  |     |
| 11 | Gallatin | M5     | $\hat{Y} = 0.076e^{0.238(YEAR-1997)}$  |     |
| 12 | Gallatin | M6     | $\hat{Y} = 0.029e^{0.479(YEAR-1997)}$  |     |

Null deviance: 120.56 on 80 degrees of freedom  
Residual deviance: 84.59 on 63 degrees of freedom  
(51 observations deleted due to missingness)  
AIC: 185.87

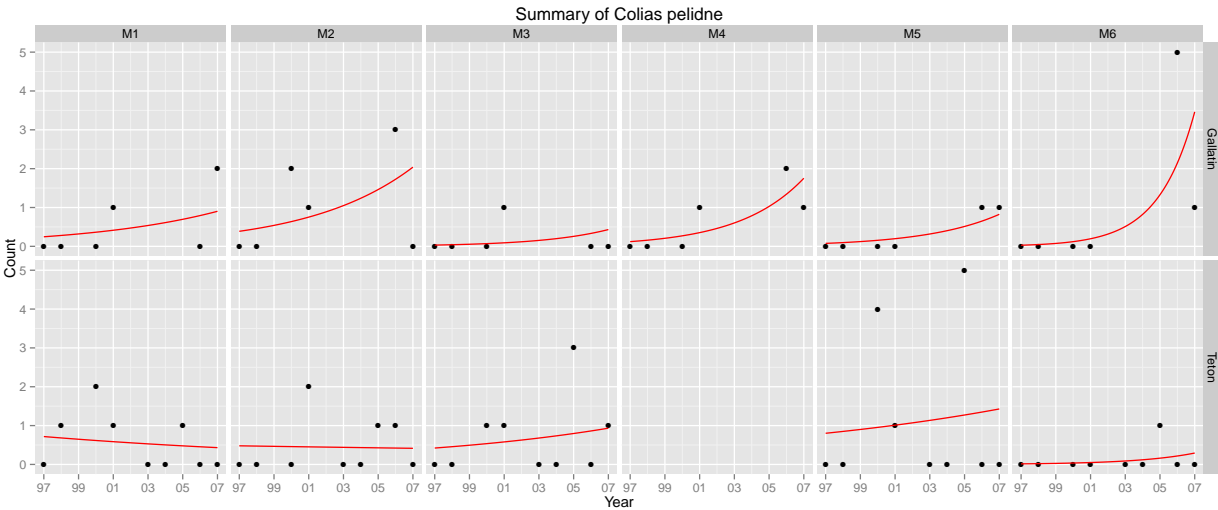

Figure C30: Time series plot of *Colias pelidne* by region and meadow type



## Colias pelidne

Table C60: Poisson regression parameter estimates for Colias pelidne

|                         | Estimate | Std. Error | z value | P-value |
|-------------------------|----------|------------|---------|---------|
| (Intercept)             | -0.3318  | 0.6932     | -0.48   | 0.6322  |
| Year                    | -0.0507  | 0.1112     | -0.46   | 0.6484  |
| MeadowM2                | -0.4037  | 0.9581     | -0.42   | 0.6735  |
| MeadowM3                | -0.5311  | 1.0786     | -0.49   | 0.6224  |
| MeadowM4                | -0.7075  | 1.7103     | -0.41   | 0.6791  |
| MeadowM5                | 0.1115   | 0.9104     | 0.12    | 0.9025  |
| MeadowM6                | -3.8814  | 2.0710     | -1.87   | 0.0609  |
| RegionGallatin          | -1.0687  | 0.9784     | -1.09   | 0.2747  |
| Year:MeadowM2           | 0.0363   | 0.1373     | 0.26    | 0.7913  |
| Year:MeadowM3           | 0.1301   | 0.1599     | 0.81    | 0.4160  |
| Year:MeadowM4           | 0.1372   | 0.2042     | 0.67    | 0.5018  |
| Year:MeadowM5           | 0.1084   | 0.1379     | 0.79    | 0.4321  |
| Year:MeadowM6           | 0.3493   | 0.2336     | 1.50    | 0.1348  |
| Year:RegionGallatin     | 0.1805   | 0.1105     | 1.63    | 0.1025  |
| MeadowM2:RegionGallatin | 0.8554   | 1.0006     | 0.85    | 0.3926  |
| MeadowM3:RegionGallatin | -1.5061  | 1.3491     | -1.12   | 0.2642  |
| MeadowM5:RegionGallatin | -1.2855  | 1.1055     | -1.16   | 0.2449  |
| MeadowM6:RegionGallatin | 1.7335   | 1.3699     | 1.27    | 0.2057  |

31 Colias gigantea

Table C61: Poisson regression fitted models for Colias gigantea

|    | Region   | Meadow | Model                                 | Sig |
|----|----------|--------|---------------------------------------|-----|
| 1  | Teton    | M1     | $\hat{Y} = 3.341e^{0.105(YEAR-1997)}$ |     |
| 2  | Teton    | M2     | $\hat{Y} = 0.501e^{0.132(YEAR-1997)}$ | *** |
| 3  | Teton    | M3     | $\hat{Y} = 0.191e^{0.095(YEAR-1997)}$ | *** |
| 5  | Teton    | M5     | $\hat{Y} = 0e^{-0.047(YEAR-1997)}$    |     |
| 6  | Teton    | M6     | $\hat{Y} = 0e^{-0.047(YEAR-1997)}$    |     |
| 7  | Gallatin | M1     | $\hat{Y} = 0.096e^{0.208(YEAR-1997)}$ | *** |
| 8  | Gallatin | M2     | $\hat{Y} = 0.589e^{0.234(YEAR-1997)}$ | *** |
| 9  | Gallatin | M3     | $\hat{Y} = 0e^{0.197(YEAR-1997)}$     | *** |
| 10 | Gallatin | M4     | $\hat{Y} = 0e^{0(YEAR-1997)}$         | *** |
| 11 | Gallatin | M5     | $\hat{Y} = 0e^{0.055(YEAR-1997)}$     | *** |
| 12 | Gallatin | M6     | $\hat{Y} = 0e^{0.055(YEAR-1997)}$     | *** |

Null deviance: 335.50 on 80 degrees of freedom  
Residual deviance: 102.37 on 63 degrees of freedom  
(51 observations deleted due to missingness)  
AIC: 193.13

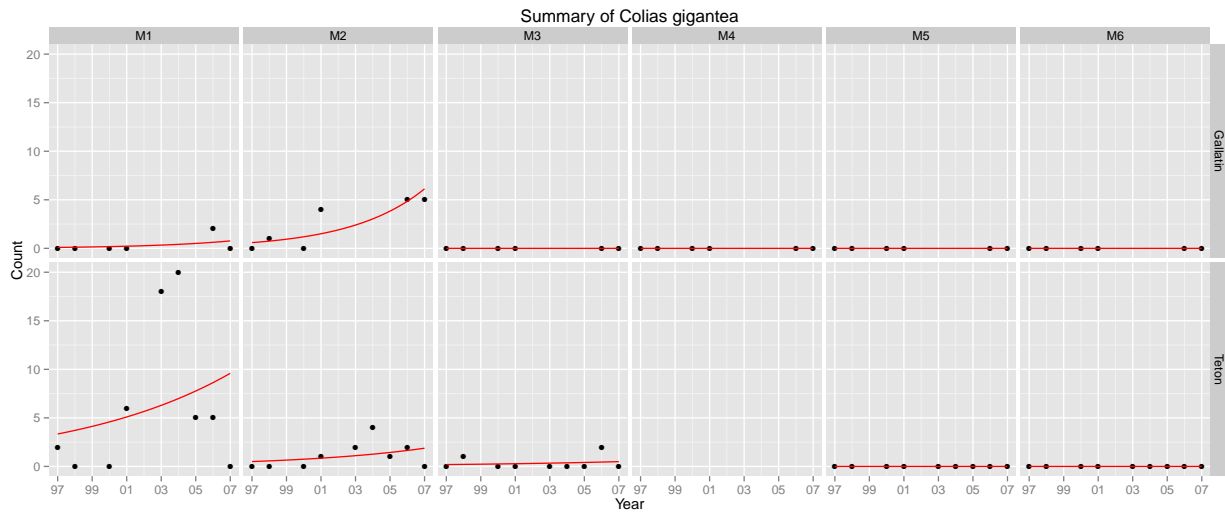

Figure C31: Time series plot of Colias gigantea by region and meadow type

# Colias gigantea

Table C62: Poisson regression parameter estimates for *Colias gigantea*

|                         | Estimate | Std. Error | z value | P-value |
|-------------------------|----------|------------|---------|---------|
| (Intercept)             | 1.2064   | 0.3052     | 3.95    | 0.0001  |
| Year                    | 0.1054   | 0.0426     | 2.47    | 0.0134  |
| MeadowM2                | -1.8970  | 0.7577     | -2.50   | 0.0123  |
| MeadowM3                | -2.8610  | 1.3418     | -2.13   | 0.0330  |
| MeadowM4                | -16.9588 | 5988.0077  | -0.00   | 0.9977  |
| MeadowM5                | -20.2641 | 4525.6032  | -0.00   | 0.9964  |
| MeadowM6                | -20.2641 | 4525.6032  | -0.00   | 0.9964  |
| RegionGallatin          | -3.5502  | 1.0977     | -3.23   | 0.0012  |
| Year:MeadowM2           | 0.0266   | 0.1017     | 0.26    | 0.7939  |
| Year:MeadowM3           | -0.0103  | 0.1899     | -0.05   | 0.9568  |
| Year:MeadowM4           | -0.2076  | 1019.4661  | -0.00   | 0.9998  |
| Year:MeadowM5           | -0.1528  | 679.9500   | -0.00   | 0.9998  |
| Year:MeadowM6           | -0.1528  | 679.9500   | -0.00   | 0.9998  |
| Year:RegionGallatin     | 0.1022   | 0.1126     | 0.91    | 0.3642  |
| MeadowM2:RegionGallatin | 3.7116   | 0.8315     | 4.46    | 0.0000  |
| MeadowM3:RegionGallatin | -15.1184 | 3572.0737  | -0.00   | 0.9966  |
| MeadowM5:RegionGallatin | 3.0453   | 4962.5251  | 0.00    | 0.9995  |
| MeadowM6:RegionGallatin | 3.0453   | 4962.5251  | 0.00    | 0.9995  |

## 32 Lycaeides idas

Table C63: Poisson regression fitted models for *Lycaeides idas*

|    | Region   | Meadow | Model                                  | Sig |
|----|----------|--------|----------------------------------------|-----|
| 1  | Teton    | M1     | $\hat{Y} = 0e^{-0.272(YEAR-1997)}$     |     |
| 2  | Teton    | M2     | $\hat{Y} = 0.531e^{-0.588(YEAR-1997)}$ |     |
| 3  | Teton    | M3     | $\hat{Y} = 2.986e^{0.078(YEAR-1997)}$  |     |
| 5  | Teton    | M5     | $\hat{Y} = 1.493e^{-0.039(YEAR-1997)}$ |     |
| 6  | Teton    | M6     | $\hat{Y} = 0.097e^{0.137(YEAR-1997)}$  | *** |
| 7  | Gallatin | M1     | $\hat{Y} = 1.04e^{-0.12(YEAR-1997)}$   |     |
| 8  | Gallatin | M2     | $\hat{Y} = 0e^{-0.436(YEAR-1997)}$     |     |
| 9  | Gallatin | M3     | $\hat{Y} = 0.081e^{0.23(YEAR-1997)}$   |     |
| 10 | Gallatin | M4     | $\hat{Y} = 0.024e^{0.425(YEAR-1997)}$  |     |
| 11 | Gallatin | M5     | $\hat{Y} = 0.091e^{0.113(YEAR-1997)}$  |     |
| 12 | Gallatin | M6     | $\hat{Y} = 0.202e^{0.289(YEAR-1997)}$  | *** |

Null deviance: 239.270 on 80 degrees of freedom

Residual deviance: 93.462 on 63 degrees of freedom

(51 observations deleted due to missingness)

AIC: 192.70

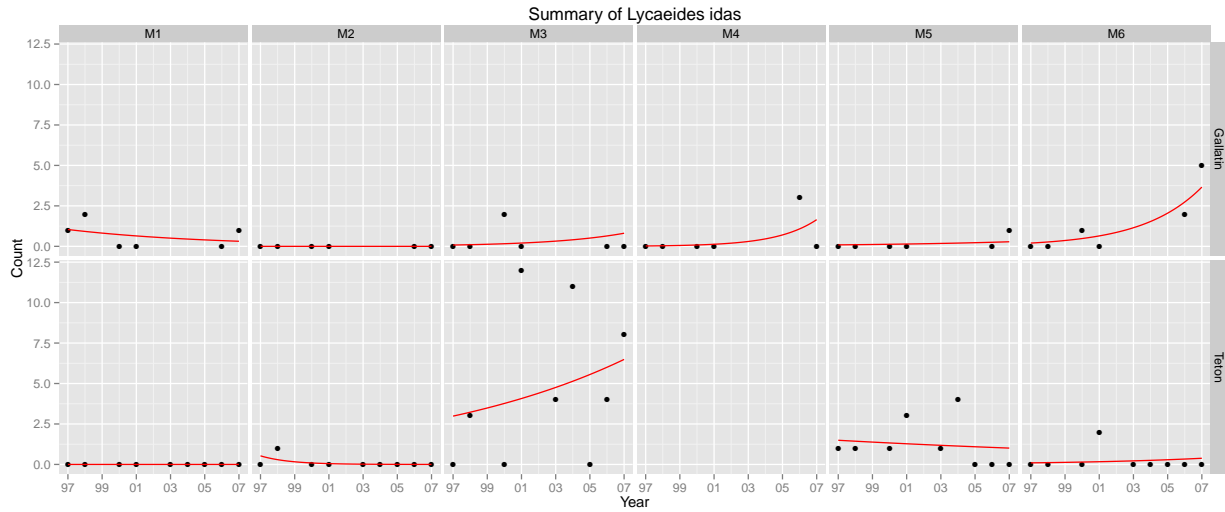

Figure C32: Time series plot of *Lycaeides idas* by region and meadow type

# Lycaeides idas

Table C64: Poisson regression parameter estimates for Lycaeides idas

|                         | Estimate | Std. Error | z value | P-value |
|-------------------------|----------|------------|---------|---------|
| (Intercept)             | -16.9706 | 1655.4835  | -0.01   | 0.9918  |
| Year                    | -0.2724  | 0.2127     | -1.28   | 0.2004  |
| MeadowM2                | 16.3373  | 1655.4839  | 0.01    | 0.9921  |
| MeadowM3                | 18.0644  | 1655.4835  | 0.01    | 0.9913  |
| MeadowM4                | -3.7883  | 2.7361     | -1.38   | 0.1662  |
| MeadowM5                | 17.3713  | 1655.4836  | 0.01    | 0.9916  |
| MeadowM6                | 14.6379  | 1655.4838  | 0.01    | 0.9929  |
| RegionGallatin          | 17.0097  | 1655.4835  | 0.01    | 0.9918  |
| Year:MeadowM2           | -0.3160  | 0.6587     | -0.48   | 0.6314  |
| Year:MeadowM3           | 0.3500   | 0.2133     | 1.64    | 0.1009  |
| Year:MeadowM4           | 0.5447   | 0.3263     | 1.67    | 0.0951  |
| Year:MeadowM5           | 0.2332   | 0.2197     | 1.06    | 0.2884  |
| Year:MeadowM6           | 0.4092   | 0.1920     | 2.13    | 0.0331  |
| Year:RegionGallatin     | 0.1526   | 0.1460     | 1.04    | 0.2961  |
| MeadowM2:RegionGallatin | -33.4243 | 2669.8085  | -0.01   | 0.9900  |
| MeadowM3:RegionGallatin | -20.6171 | 1655.4838  | -0.01   | 0.9901  |
| MeadowM5:RegionGallatin | -19.8071 | 1655.4839  | -0.01   | 0.9905  |
| MeadowM6:RegionGallatin | -16.2741 | 1655.4838  | -0.01   | 0.9922  |

### 33 Vanessa cardui

Table C65: Poisson regression fitted models for *Vanessa cardui*

|    | Region   | Meadow | Model                                  | Sig |
|----|----------|--------|----------------------------------------|-----|
| 1  | Teton    | M1     | $\hat{Y} = 1.042e^{0.029(YEAR-1997)}$  |     |
| 2  | Teton    | M2     | $\hat{Y} = 0.97e^{0.129(YEAR-1997)}$   |     |
| 3  | Teton    | M3     | $\hat{Y} = 1.798e^{0.038(YEAR-1997)}$  |     |
| 5  | Teton    | M5     | $\hat{Y} = 0.775e^{0.046(YEAR-1997)}$  |     |
| 6  | Teton    | M6     | $\hat{Y} = 1.317e^{0.042(YEAR-1997)}$  |     |
| 7  | Gallatin | M1     | $\hat{Y} = 6.512e^{-0.12(YEAR-1997)}$  | *** |
| 8  | Gallatin | M2     | $\hat{Y} = 2.185e^{-0.02(YEAR-1997)}$  | *** |
| 9  | Gallatin | M3     | $\hat{Y} = 5.573e^{-0.111(YEAR-1997)}$ | *** |
| 10 | Gallatin | M4     | $\hat{Y} = 6.186e^{-0.147(YEAR-1997)}$ | *** |
| 11 | Gallatin | M5     | $\hat{Y} = 2.228e^{-0.104(YEAR-1997)}$ | *** |
| 12 | Gallatin | M6     | $\hat{Y} = 2.001e^{-0.107(YEAR-1997)}$ | *** |

Null deviance: 401.78 on 80 degrees of freedom  
Residual deviance: 347.16 on 63 degrees of freedom  
(51 observations deleted due to missingness)  
AIC: 496.36

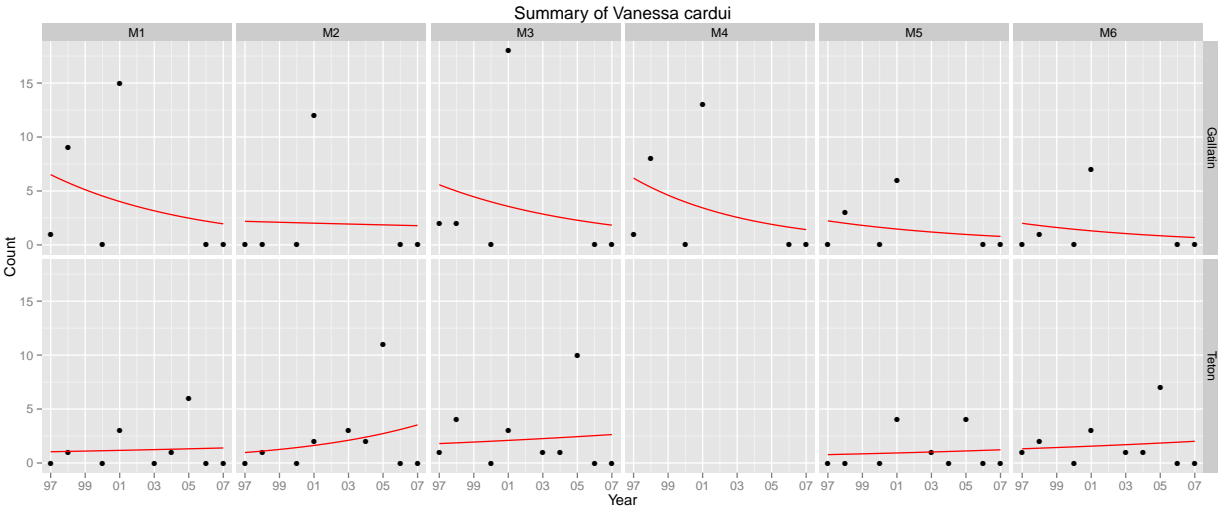

Figure C33: Time series plot of *Vanessa cardui* by region and meadow type

## Vanessa cardui

Table C66: Poisson regression parameter estimates for *Vanessa cardui*

|                         | Estimate | Std. Error | z value | P-value |
|-------------------------|----------|------------|---------|---------|
| (Intercept)             | 0.0409   | 0.4630     | 0.09    | 0.9297  |
| Year                    | 0.0291   | 0.0622     | 0.47    | 0.6399  |
| MeadowM2                | -0.0712  | 0.6000     | -0.12   | 0.9055  |
| MeadowM3                | 0.5456   | 0.5481     | 1.00    | 0.3195  |
| MeadowM4                | -0.0514  | 0.3836     | -0.13   | 0.8935  |
| MeadowM5                | -0.2956  | 0.6804     | -0.43   | 0.6639  |
| MeadowM6                | 0.2342   | 0.6217     | 0.38    | 0.7064  |
| RegionGallatin          | 1.8328   | 0.4584     | 4.00    | 0.0001  |
| Year:MeadowM2           | 0.1002   | 0.0755     | 1.33    | 0.1847  |
| Year:MeadowM3           | 0.0092   | 0.0701     | 0.13    | 0.8961  |
| Year:MeadowM4           | -0.0268  | 0.0878     | -0.30   | 0.7606  |
| Year:MeadowM5           | 0.0165   | 0.0886     | 0.19    | 0.8519  |
| Year:MeadowM6           | 0.0133   | 0.0835     | 0.16    | 0.8737  |
| Year:RegionGallatin     | -0.1495  | 0.0511     | -2.93   | 0.0034  |
| MeadowM2:RegionGallatin | -1.0209  | 0.5514     | -1.85   | 0.0641  |
| MeadowM3:RegionGallatin | -0.7013  | 0.5109     | -1.37   | 0.1698  |
| MeadowM5:RegionGallatin | -0.7770  | 0.6390     | -1.22   | 0.2240  |
| MeadowM6:RegionGallatin | -1.4143  | 0.6094     | -2.32   | 0.0203  |

34 Phyciodes selenis

Table C67: Poisson regression fitted models for Phyciodes selenis

|    | Region   | Meadow | Model                                  | Sig |
|----|----------|--------|----------------------------------------|-----|
| 1  | Teton    | M1     | $\hat{Y} = 11.528e^{0.022(YEAR-1997)}$ |     |
| 2  | Teton    | M2     | $\hat{Y} = 9.624e^{0.084(YEAR-1997)}$  |     |
| 3  | Teton    | M3     | $\hat{Y} = 0.76e^{0.049(YEAR-1997)}$   | *** |
| 5  | Teton    | M5     | $\hat{Y} = 1.185e^{-0.246(YEAR-1997)}$ | *** |
| 6  | Teton    | M6     | $\hat{Y} = 0e^{-0.504(YEAR-1997)}$     |     |
| 7  | Gallatin | M1     | $\hat{Y} = 0.443e^{0.026(YEAR-1997)}$  | *** |
| 8  | Gallatin | M2     | $\hat{Y} = 0.953e^{0.088(YEAR-1997)}$  | *** |
| 9  | Gallatin | M3     | $\hat{Y} = 1.029e^{0.053(YEAR-1997)}$  | *** |
| 10 | Gallatin | M4     | $\hat{Y} = 0.721e^{-0.018(YEAR-1997)}$ | *** |
| 11 | Gallatin | M5     | $\hat{Y} = 0.351e^{-0.242(YEAR-1997)}$ | *** |
| 12 | Gallatin | M6     | $\hat{Y} = 1.009e^{-0.5(YEAR-1997)}$   | *** |

Null deviance: 833.19 on 80 degrees of freedom  
Residual deviance: 225.35 on 63 degrees of freedom  
(51 observations deleted due to missingness)  
AIC: 384.54

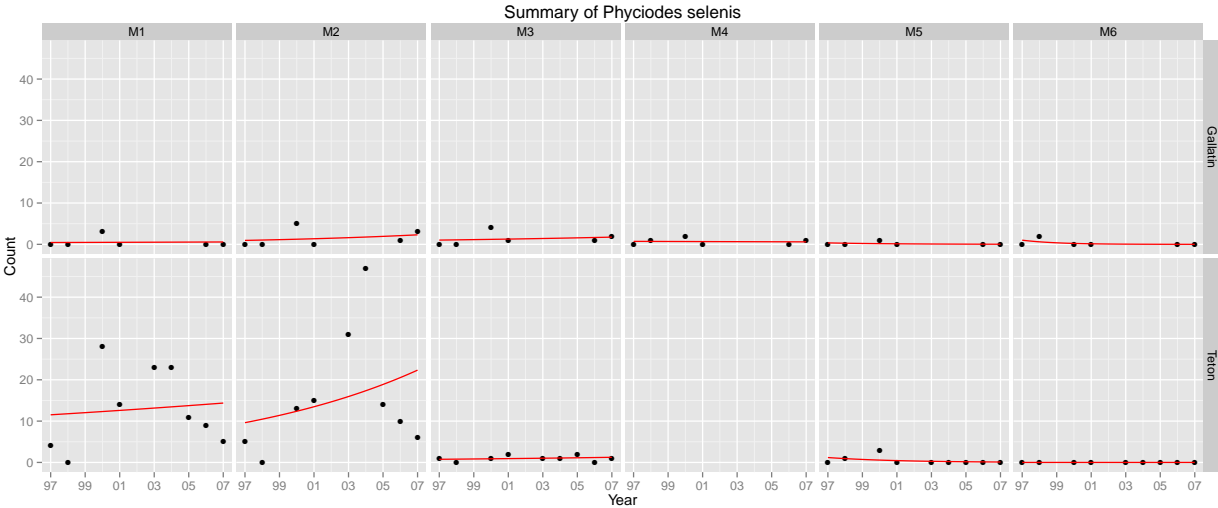

Figure C34: Time series plot of Phyciodes selenis by region and meadow type



# Phyciodes selenis

Table C68: Poisson regression parameter estimates for Phyciodes selenis

|                         | Estimate | Std. Error | z value | P-value |
|-------------------------|----------|------------|---------|---------|
| (Intercept)             | 2.4448   | 0.1797     | 13.61   | 0.0000  |
| Year                    | 0.0220   | 0.0276     | 0.80    | 0.4253  |
| MeadowM2                | -0.1806  | 0.2550     | -0.71   | 0.4789  |
| MeadowM3                | -2.7196  | 0.5891     | -4.62   | 0.0000  |
| MeadowM4                | 0.4875   | 1.0138     | 0.48    | 0.6306  |
| MeadowM5                | -2.2754  | 0.6852     | -3.32   | 0.0009  |
| MeadowM6                | -17.9410 | 976.9301   | -0.02   | 0.9853  |
| RegionGallatin          | -3.2599  | 0.6713     | -4.86   | 0.0000  |
| Year:MeadowM2           | 0.0622   | 0.0377     | 1.65    | 0.0993  |
| Year:MeadowM3           | 0.0270   | 0.0817     | 0.33    | 0.7408  |
| Year:MeadowM4           | -0.0438  | 0.1517     | -0.29   | 0.7728  |
| Year:MeadowM5           | -0.2679  | 0.1598     | -1.68   | 0.0936  |
| Year:MeadowM6           | -0.5264  | 0.4820     | -1.09   | 0.2747  |
| Year:RegionGallatin     | 0.0040   | 0.0672     | 0.06    | 0.9525  |
| MeadowM2:RegionGallatin | 0.9474   | 0.6816     | 1.39    | 0.1645  |
| MeadowM3:RegionGallatin | 3.5632   | 0.7630     | 4.67    | 0.0000  |
| MeadowM5:RegionGallatin | 2.0426   | 1.2814     | 1.59    | 0.1109  |
| MeadowM6:RegionGallatin | 18.7652  | 976.9304   | 0.02    | 0.9847  |

35 *Lycaena hyllus*

Table C69: Poisson regression fitted models for *Lycaena hyllus*

|    | Region   | Meadow | Model                                  | Sig |
|----|----------|--------|----------------------------------------|-----|
| 1  | Teton    | M1     | $\hat{Y} = 0.655e^{-0.15(YEAR-1997)}$  |     |
| 2  | Teton    | M2     | $\hat{Y} = 7.319e^{-0.163(YEAR-1997)}$ | *** |
| 3  | Teton    | M3     | $\hat{Y} = 0e^{-0.753(YEAR-1997)}$     |     |
| 5  | Teton    | M5     | $\hat{Y} = 0.273e^{-0.218(YEAR-1997)}$ |     |
| 6  | Teton    | M6     | $\hat{Y} = 0.194e^{-0.119(YEAR-1997)}$ |     |
| 7  | Gallatin | M1     | $\hat{Y} = 0e^{16.253(YEAR-1997)}$     |     |
| 8  | Gallatin | M2     | $\hat{Y} = 0e^{16.24(YEAR-1997)}$      | *** |
| 9  | Gallatin | M3     | $\hat{Y} = 0e^{15.649(YEAR-1997)}$     |     |
| 10 | Gallatin | M4     | $\hat{Y} = 0e^{0(YEAR-1997)}$          |     |
| 11 | Gallatin | M5     | $\hat{Y} = 0e^{16.185(YEAR-1997)}$     |     |
| 12 | Gallatin | M6     | $\hat{Y} = 0e^{16.284(YEAR-1997)}$     |     |

Null deviance: 202.163 on 80 degrees of freedom  
Residual deviance: 65.891 on 63 degrees of freedom  
(51 observations deleted due to missingness)  
AIC: 130.03

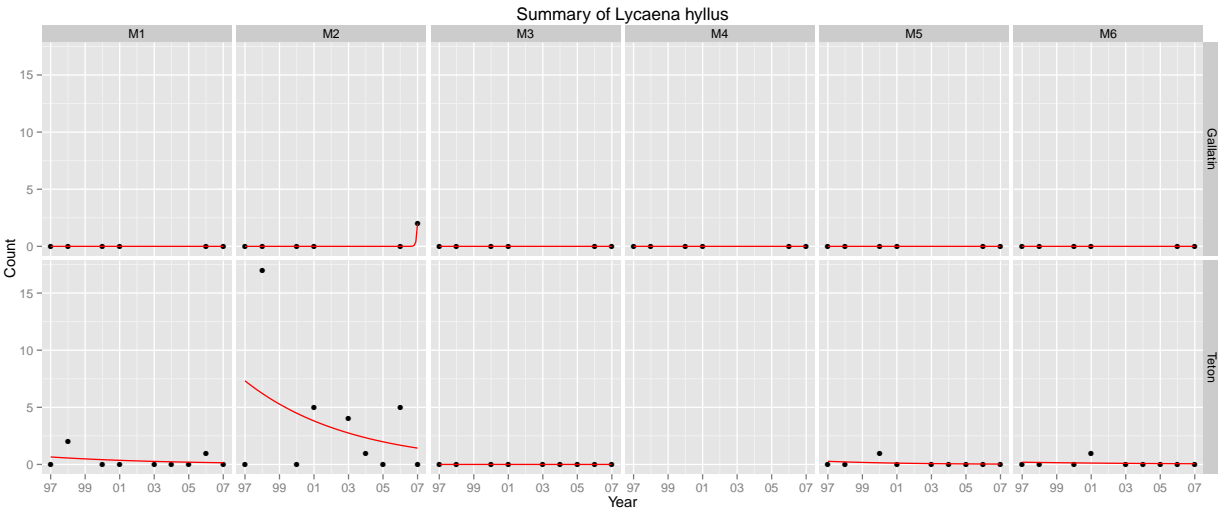

Figure C35: Time series plot of *Lycaena hyllus* by region and meadow type

# Lycaena hyllus

Table C70: Poisson regression parameter estimates for Lycaena hyllus

|                         | Estimate  | Std. Error | z value | P-value |
|-------------------------|-----------|------------|---------|---------|
| (Intercept)             | -0.4237   | 0.8728     | -0.49   | 0.6273  |
| Year                    | -0.1503   | 0.1785     | -0.84   | 0.4000  |
| MeadowM2                | 2.4142    | 0.9117     | 2.65    | 0.0081  |
| MeadowM3                | -19.8509  | 13723.2095 | -0.00   | 0.9988  |
| MeadowM4                | 159.9714  | 32658.6606 | 0.00    | 0.9961  |
| MeadowM5                | -0.8733   | 1.6566     | -0.53   | 0.5981  |
| MeadowM6                | -1.2182   | 1.7976     | -0.68   | 0.4980  |
| RegionGallatin          | -181.8502 | 18611.7267 | -0.01   | 0.9922  |
| Year:MeadowM2           | -0.0131   | 0.1869     | -0.07   | 0.9442  |
| Year:MeadowM3           | -0.6032   | 9934.1244  | -0.00   | 1.0000  |
| Year:MeadowM4           | -16.2526  | 4790.8253  | -0.00   | 0.9973  |
| Year:MeadowM5           | -0.0677   | 0.3755     | -0.18   | 0.8569  |
| Year:MeadowM6           | 0.0312    | 0.3517     | 0.09    | 0.9293  |
| Year:RegionGallatin     | 16.4029   | 1441.1398  | 0.01    | 0.9909  |
| MeadowM2:RegionGallatin | 18.1576   | 11777.4368 | 0.00    | 0.9988  |
| MeadowM3:RegionGallatin | 25.8577   | 94858.7491 | 0.00    | 0.9998  |
| MeadowM5:RegionGallatin | 1.4552    | 17067.9074 | 0.00    | 0.9999  |
| MeadowM6:RegionGallatin | 0.7925    | 17149.8429 | 0.00    | 1.0000  |

# 36 Callophrys dumetorum

Table C71: Poisson regression fitted models for Callophrys dumetorum

|    | Region   | Meadow | Model                                  | Sig |
|----|----------|--------|----------------------------------------|-----|
| 1  | Teton    | M1     | $\hat{Y} = 0e^{-0.075(YEAR-1997)}$     |     |
| 2  | Teton    | M2     | $\hat{Y} = 0e^{-0.075(YEAR-1997)}$     |     |
| 3  | Teton    | M3     | $\hat{Y} = 0.273e^{-0.218(YEAR-1997)}$ |     |
| 5  | Teton    | M5     | $\hat{Y} = 0e^{-0.075(YEAR-1997)}$     |     |
| 6  | Teton    | M6     | $\hat{Y} = 6.284e^{-0.339(YEAR-1997)}$ |     |
| 7  | Gallatin | M1     | $\hat{Y} = 0e^{0.089(YEAR-1997)}$      |     |
| 8  | Gallatin | M2     | $\hat{Y} = 0e^{0.089(YEAR-1997)}$      |     |
| 9  | Gallatin | M3     | $\hat{Y} = 0e^{-0.054(YEAR-1997)}$     |     |
| 10 | Gallatin | M4     | $\hat{Y} = 0e^{0(YEAR-1997)}$          |     |
| 11 | Gallatin | M5     | $\hat{Y} = 0e^{0.089(YEAR-1997)}$      |     |
| 12 | Gallatin | M6     | $\hat{Y} = 0e^{-0.175(YEAR-1997)}$     |     |

Null deviance: 117.881 on 80 degrees of freedom  
Residual deviance: 28.848 on 63 degrees of freedom  
(51 observations deleted due to missingness)  
AIC: 77.263

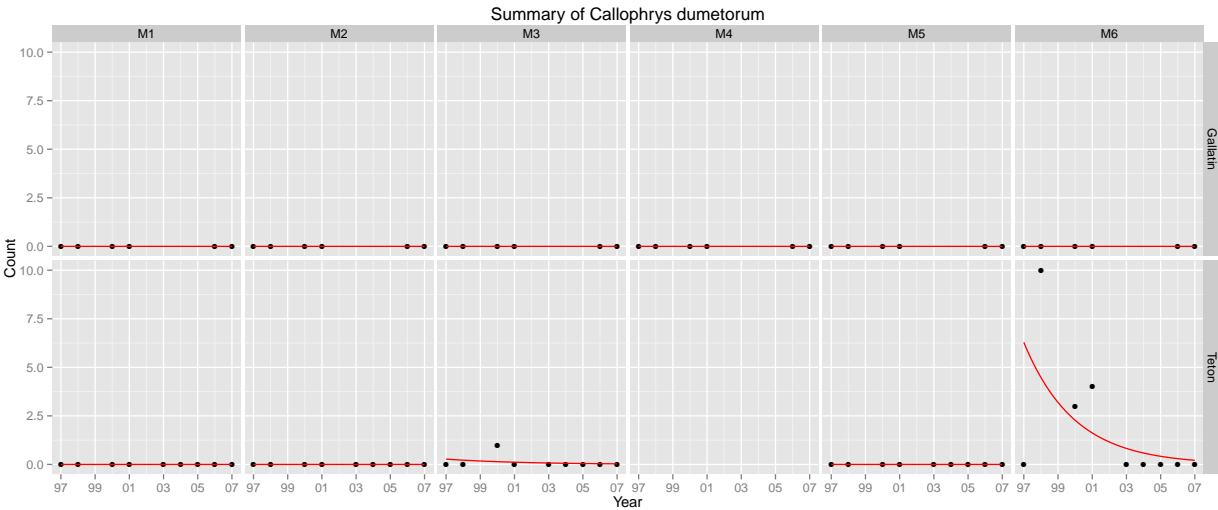

Figure C36: Time series plot of Callophrys dumetorum by region and meadow type

# Callophrys dumetorum

Table C72: Poisson regression parameter estimates for *Callophrys dumetorum*

|                         | Estimate | Std. Error | z value | P-value |
|-------------------------|----------|------------|---------|---------|
| (Intercept)             | -20.8842 | 12013.8199 | -0.00   | 0.9986  |
| Year                    | -0.0749  | 1928.3825  | -0.00   | 1.0000  |
| MeadowM2                | 0.0000   | 16406.9074 | 0.00    | 1.0000  |
| MeadowM3                | 19.5871  | 12013.8199 | 0.00    | 0.9987  |
| MeadowM4                | 0.3672   | 22222.7882 | 0.00    | 1.0000  |
| MeadowM5                | 0.0000   | 16406.9074 | 0.00    | 1.0000  |
| MeadowM6                | 22.7223  | 12013.8199 | 0.00    | 0.9985  |
| RegionGallatin          | -0.7856  | 15244.7874 | -0.00   | 1.0000  |
| Year:MeadowM2           | -0.0000  | 2543.8242  | -0.00   | 1.0000  |
| Year:MeadowM3           | -0.1431  | 1928.3825  | -0.00   | 0.9999  |
| Year:MeadowM4           | -0.0887  | 3391.7315  | -0.00   | 1.0000  |
| Year:MeadowM5           | -0.0000  | 2543.8242  | -0.00   | 1.0000  |
| Year:MeadowM6           | -0.2637  | 1928.3825  | -0.00   | 0.9999  |
| Year:RegionGallatin     | 0.1636   | 1462.4100  | 0.00    | 0.9999  |
| MeadowM2:RegionGallatin | -0.0000  | 18709.8311 | -0.00   | 1.0000  |
| MeadowM3:RegionGallatin | -18.9625 | 16887.2621 | -0.00   | 0.9991  |
| MeadowM5:RegionGallatin | -0.0000  | 18709.8311 | -0.00   | 1.0000  |
| MeadowM6:RegionGallatin | -21.3557 | 16238.5361 | -0.00   | 0.9990  |

### 37 Pontia beckerii

Table C73: Poisson regression fitted models for Pontia beckerii

|    | Region   | Meadow | Model                                  | Sig |
|----|----------|--------|----------------------------------------|-----|
| 1  | Teton    | M1     | $\hat{Y} = 0e^{18.065(YEAR-1997)}$     |     |
| 2  | Teton    | M2     | $\hat{Y} = 0e^{18.065(YEAR-1997)}$     |     |
| 3  | Teton    | M3     | $\hat{Y} = 0e^{0.916(YEAR-1997)}$      |     |
| 5  | Teton    | M5     | $\hat{Y} = 0.002e^{0.528(YEAR-1997)}$  |     |
| 6  | Teton    | M6     | $\hat{Y} = 0.001e^{0.59(YEAR-1997)}$   |     |
| 7  | Gallatin | M1     | $\hat{Y} = 0e^{17.441(YEAR-1997)}$     |     |
| 8  | Gallatin | M2     | $\hat{Y} = 0e^{17.441(YEAR-1997)}$     |     |
| 9  | Gallatin | M3     | $\hat{Y} = 0.075e^{0.292(YEAR-1997)}$  |     |
| 10 | Gallatin | M4     | $\hat{Y} = 0e^{0(YEAR-1997)}$          |     |
| 11 | Gallatin | M5     | $\hat{Y} = 0.242e^{-0.096(YEAR-1997)}$ |     |
| 12 | Gallatin | M6     | $\hat{Y} = 0.577e^{-0.033(YEAR-1997)}$ |     |

Null deviance: 55.193 on 80 degrees of freedom  
Residual deviance: 26.220 on 63 degrees of freedom  
(51 observations deleted due to missingness)  
AIC: 81.826

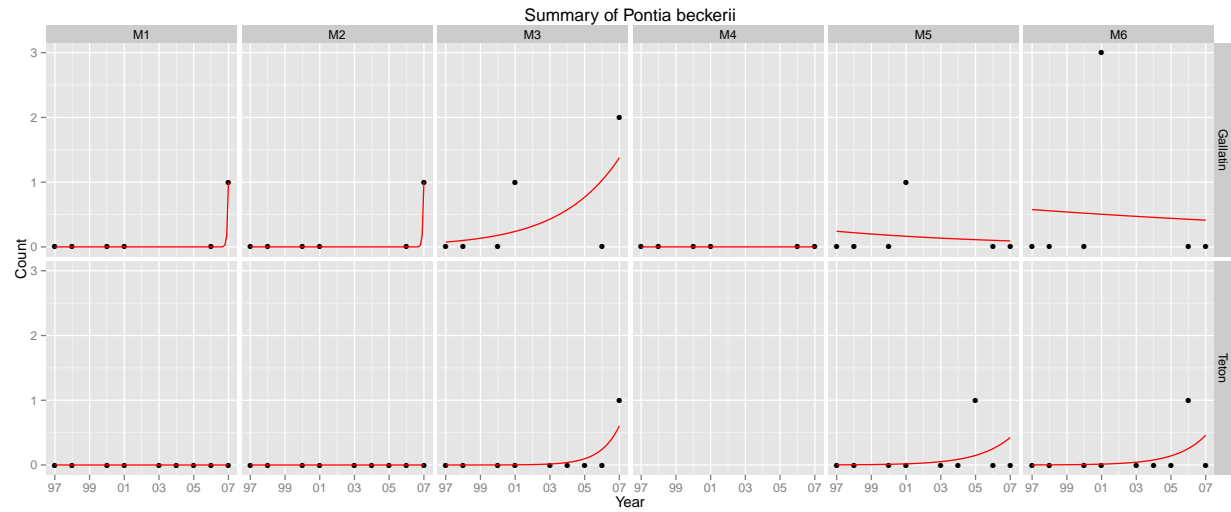

Figure C37: Time series plot of Pontia beckerii by region and meadow type

# Pontia beckerii

Table C74: Poisson regression parameter estimates for Pontia beckerii

|                         | Estimate  | Std. Error | z value | P-value |
|-------------------------|-----------|------------|---------|---------|
| (Intercept)             | -200.8488 | 39989.2917 | -0.01   | 0.9960  |
| Year                    | 18.0648   | 3716.0504  | 0.00    | 0.9961  |
| MeadowM2                | -0.0000   | 56553.3984 | -0.00   | 1.0000  |
| MeadowM3                | 191.1883  | 39989.2915 | 0.00    | 0.9962  |
| MeadowM4                | 151.1057  | 57780.5080 | 0.00    | 0.9979  |
| MeadowM5                | 194.7204  | 39989.2915 | 0.00    | 0.9961  |
| MeadowM6                | 194.1658  | 39989.2915 | 0.00    | 0.9961  |
| RegionGallatin          | 26.4404   | 14772.9824 | 0.00    | 0.9986  |
| Year:MeadowM2           | 0.0000    | 5255.2888  | 0.00    | 1.0000  |
| Year:MeadowM3           | -17.1492  | 3716.0503  | -0.00   | 0.9963  |
| Year:MeadowM4           | -17.4408  | 8399.6129  | -0.00   | 0.9983  |
| Year:MeadowM5           | -17.5372  | 3716.0503  | -0.00   | 0.9962  |
| Year:MeadowM6           | -17.4743  | 3716.0503  | -0.00   | 0.9962  |
| Year:RegionGallatin     | -0.6239   | 0.4446     | -1.40   | 0.1605  |
| MeadowM2:RegionGallatin | 0.0000    | 20892.1514 | 0.00    | 1.0000  |
| MeadowM3:RegionGallatin | -19.3759  | 14772.9818 | -0.00   | 0.9990  |
| MeadowM5:RegionGallatin | -21.7325  | 14772.9819 | -0.00   | 0.9988  |
| MeadowM6:RegionGallatin | -20.3078  | 14772.9818 | -0.00   | 0.9989  |

# 38 Parnassius phoebus smintheus

Table C75: Poisson regression fitted models for Parnassius phoebus smintheus

|    | Region   | Meadow | Model                                   | Sig |
|----|----------|--------|-----------------------------------------|-----|
| 1  | Teton    | M1     | $\hat{Y} = 0e^{-0.841(YEAR-1997)}$      |     |
| 2  | Teton    | M2     | $\hat{Y} = 0.329e^{-0.287(YEAR-1997)}$  |     |
| 3  | Teton    | M3     | $\hat{Y} = 0.547e^{-0.218(YEAR-1997)}$  |     |
| 5  | Teton    | M5     | $\hat{Y} = 0.831e^{-0.401(YEAR-1997)}$  |     |
| 6  | Teton    | M6     | $\hat{Y} = 1.609e^{-0.383(YEAR-1997)}$  |     |
| 7  | Gallatin | M1     | $\hat{Y} = 0.505e^{-0.5(YEAR-1997)}$    | *** |
| 8  | Gallatin | M2     | $\hat{Y} = 0.256e^{0.054(YEAR-1997)}$   | *** |
| 9  | Gallatin | M3     | $\hat{Y} = 0e^{0.123(YEAR-1997)}$       | *** |
| 10 | Gallatin | M4     | $\hat{Y} = 1.351e^{-0.075(YEAR-1997)}$  | *** |
| 11 | Gallatin | M5     | $\hat{Y} = 14.953e^{-0.061(YEAR-1997)}$ | *** |
| 12 | Gallatin | M6     | $\hat{Y} = 8.349e^{-0.042(YEAR-1997)}$  | *** |

Null deviance: 453.993 on 80 degrees of freedom  
Residual deviance: 85.215 on 63 degrees of freedom  
(51 observations deleted due to missingness)  
AIC: 193.61

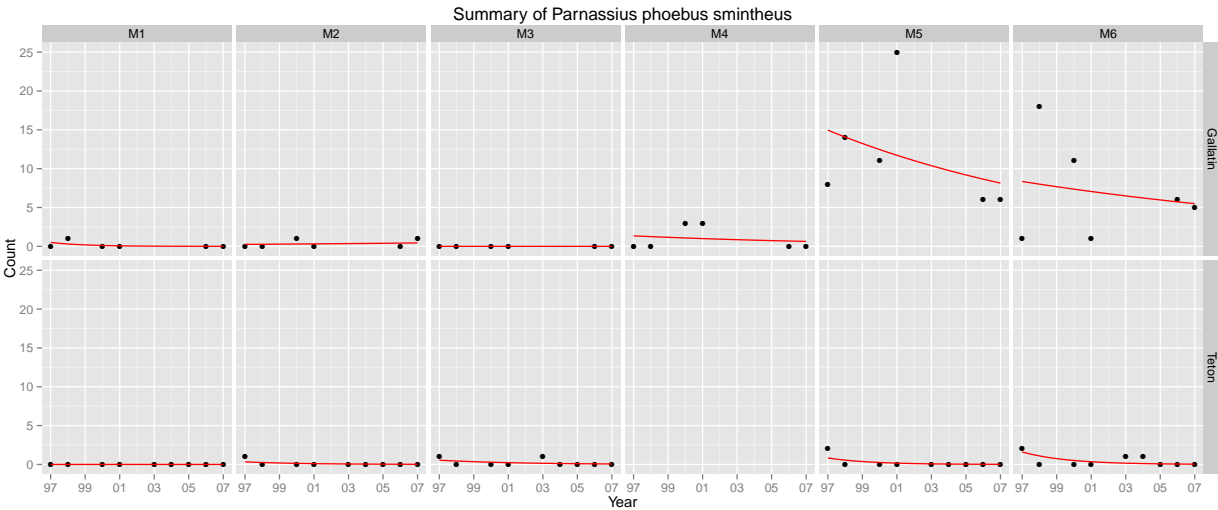

Figure C38: Time series plot of Parnassius phoebus smintheus by region and meadow type



# Parnassius phoebus smintheus

Table C76: Poisson regression parameter estimates for Parnassius phoebus smintheus

|                         | Estimate | Std. Error | z value | P-value |
|-------------------------|----------|------------|---------|---------|
| (Intercept)             | -16.8732 | 2242.0833  | -0.01   | 0.9940  |
| Year                    | -0.8411  | 0.6938     | -1.21   | 0.2254  |
| MeadowM2                | 15.7620  | 2242.0836  | 0.01    | 0.9944  |
| MeadowM3                | 16.2693  | 2242.0835  | 0.01    | 0.9942  |
| MeadowM4                | 0.9848   | 1.3380     | 0.74    | 0.4618  |
| MeadowM5                | 16.6887  | 2242.0834  | 0.01    | 0.9941  |
| MeadowM6                | 17.3488  | 2242.0834  | 0.01    | 0.9938  |
| RegionGallatin          | 16.1891  | 2242.0835  | 0.01    | 0.9942  |
| Year:MeadowM2           | 0.5543   | 0.6947     | 0.80    | 0.4249  |
| Year:MeadowM3           | 0.6231   | 0.7320     | 0.85    | 0.3947  |
| Year:MeadowM4           | 0.4250   | 0.6844     | 0.62    | 0.5346  |
| Year:MeadowM5           | 0.4396   | 0.6751     | 0.65    | 0.5150  |
| Year:MeadowM6           | 0.4585   | 0.6756     | 0.68    | 0.4973  |
| Year:RegionGallatin     | 0.3407   | 0.1633     | 2.09    | 0.0369  |
| MeadowM2:RegionGallatin | -16.4401 | 2242.0839  | -0.01   | 0.9941  |
| MeadowM3:RegionGallatin | -35.5197 | 4403.8892  | -0.01   | 0.9936  |
| MeadowM5:RegionGallatin | -13.2996 | 2242.0836  | -0.01   | 0.9953  |
| MeadowM6:RegionGallatin | -14.5425 | 2242.0836  | -0.01   | 0.9948  |

## 39 Chlosyne palla

Table C77: Poisson regression fitted models for Chlosyne palla

|    | Region   | Meadow | Model                                  | Sig |
|----|----------|--------|----------------------------------------|-----|
| 1  | Teton    | M1     | $\hat{Y} = 1.458e^{-0.104(YEAR-1997)}$ |     |
| 2  | Teton    | M2     | $\hat{Y} = 0.478e^{0.188(YEAR-1997)}$  | *** |
| 3  | Teton    | M3     | $\hat{Y} = 2.513e^{0.018(YEAR-1997)}$  |     |
| 5  | Teton    | M5     | $\hat{Y} = 0.909e^{0.036(YEAR-1997)}$  |     |
| 6  | Teton    | M6     | $\hat{Y} = 0e^{-0.063(YEAR-1997)}$     |     |
| 7  | Gallatin | M1     | $\hat{Y} = 2.532e^{0.096(YEAR-1997)}$  | *** |
| 8  | Gallatin | M2     | $\hat{Y} = 0e^{0.388(YEAR-1997)}$      | *** |
| 9  | Gallatin | M3     | $\hat{Y} = 0.31e^{0.218(YEAR-1997)}$   | *** |
| 10 | Gallatin | M4     | $\hat{Y} = 0.194e^{-0.036(YEAR-1997)}$ | *** |
| 11 | Gallatin | M5     | $\hat{Y} = 0.039e^{0.236(YEAR-1997)}$  | *** |
| 12 | Gallatin | M6     | $\hat{Y} = 0.157e^{0.137(YEAR-1997)}$  | *** |

Null deviance: 250.91 on 80 degrees of freedom

Residual deviance: 136.22 on 63 degrees of freedom

(51 observations deleted due to missingness)

AIC: 252.53

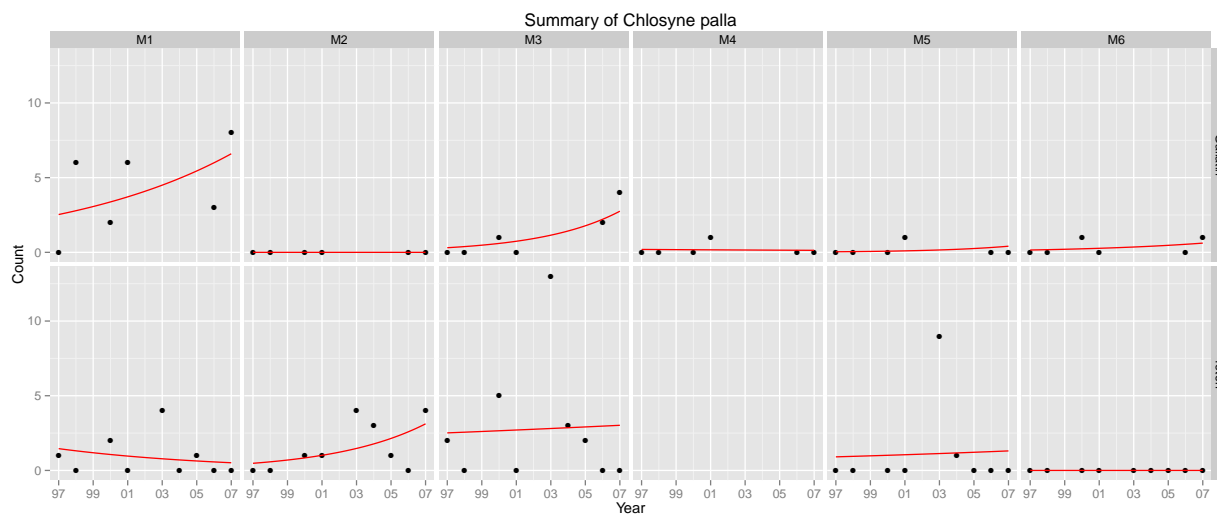

Figure C39: Time series plot of Chlosyne palla by region and meadow type

# Chlosyne palla

Table C78: Poisson regression parameter estimates for Chlosyne palla

|                         | Estimate | Std. Error | z value | P-value |
|-------------------------|----------|------------|---------|---------|
| (Intercept)             | 0.3773   | 0.4930     | 0.77    | 0.4441  |
| Year                    | -0.1043  | 0.0825     | -1.26   | 0.2065  |
| MeadowM2                | -1.1157  | 0.8860     | -1.26   | 0.2079  |
| MeadowM3                | 0.5443   | 0.5683     | 0.96    | 0.3382  |
| MeadowM4                | -2.5671  | 1.5247     | -1.68   | 0.0922  |
| MeadowM5                | -0.4725  | 0.7748     | -0.61   | 0.5420  |
| MeadowM6                | -18.3445 | 1884.2018  | -0.01   | 0.9922  |
| RegionGallatin          | 0.5517   | 0.5620     | 0.98    | 0.3263  |
| Year:MeadowM2           | 0.2919   | 0.1266     | 2.30    | 0.0212  |
| Year:MeadowM3           | 0.1227   | 0.0866     | 1.42    | 0.1564  |
| Year:MeadowM4           | -0.1319  | 0.2781     | -0.47   | 0.6352  |
| Year:MeadowM5           | 0.1405   | 0.1199     | 1.17    | 0.2411  |
| Year:MeadowM6           | 0.0415   | 0.1968     | 0.21    | 0.8328  |
| Year:RegionGallatin     | 0.2001   | 0.0843     | 2.37    | 0.0176  |
| MeadowM2:RegionGallatin | -20.4378 | 1909.8071  | -0.01   | 0.9915  |
| MeadowM3:RegionGallatin | -2.6453  | 0.6426     | -4.12   | 0.0000  |
| MeadowM5:RegionGallatin | -3.7102  | 1.1705     | -3.17   | 0.0015  |
| MeadowM6:RegionGallatin | 15.5609  | 1884.2017  | 0.01    | 0.9934  |

40 *Nymphalis milberti*

Table C79: Poisson regression fitted models for *Nymphalis milberti*

|    | Region   | Meadow | Model                                  | Sig |
|----|----------|--------|----------------------------------------|-----|
| 1  | Teton    | M1     | $\hat{Y} = 0.273e^{-0.218(YEAR-1997)}$ |     |
| 2  | Teton    | M2     | $\hat{Y} = 1.13e^{-0.348(YEAR-1997)}$  |     |
| 3  | Teton    | M3     | $\hat{Y} = 1e^{-17.747(YEAR-1997)}$    |     |
| 5  | Teton    | M5     | $\hat{Y} = 0e^{-0.223(YEAR-1997)}$     |     |
| 6  | Teton    | M6     | $\hat{Y} = 0.32e^{-0.074(YEAR-1997)}$  |     |
| 7  | Gallatin | M1     | $\hat{Y} = 0e^{0.267(YEAR-1997)}$      |     |
| 8  | Gallatin | M2     | $\hat{Y} = 0.157e^{0.137(YEAR-1997)}$  |     |
| 9  | Gallatin | M3     | $\hat{Y} = 0e^{-17.261(YEAR-1997)}$    |     |
| 10 | Gallatin | M4     | $\hat{Y} = 0e^{18.543(YEAR-1997)}$     |     |
| 11 | Gallatin | M5     | $\hat{Y} = 0e^{0.262(YEAR-1997)}$      |     |
| 12 | Gallatin | M6     | $\hat{Y} = 0e^{0.411(YEAR-1997)}$      |     |

Null deviance: 44.610 on 80 degrees of freedom  
Residual deviance: 19.857 on 63 degrees of freedom  
(51 observations deleted due to missingness)  
AIC: 74.471

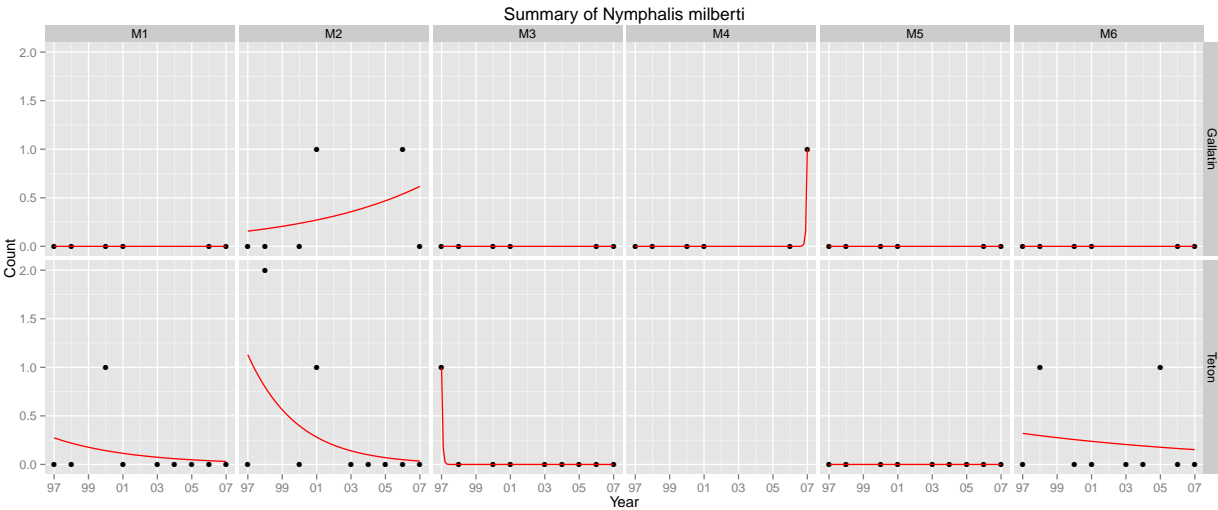

Figure C40: Time series plot of *Nymphalis milberti* by region and meadow type

# Nymphalis milberti

Table C80: Poisson regression parameter estimates for Nymphalis milberti

|                         | Estimate  | Std. Error | z value | P-value |
|-------------------------|-----------|------------|---------|---------|
| (Intercept)             | -1.2971   | 1.4080     | -0.92   | 0.3569  |
| Year                    | -0.2180   | 0.3304     | -0.66   | 0.5094  |
| MeadowM2                | 1.4194    | 1.5904     | 0.89    | 0.3722  |
| MeadowM3                | 1.2971    | 1.7269     | 0.75    | 0.4526  |
| MeadowM4                | -160.5975 | 69574.2524 | -0.00   | 0.9982  |
| MeadowM5                | -20.9517  | 26960.7400 | -0.00   | 0.9994  |
| MeadowM6                | 0.1569    | 1.8390     | 0.09    | 0.9320  |
| RegionGallatin          | -23.5396  | 26103.4248 | -0.00   | 0.9993  |
| Year:MeadowM2           | -0.1300   | 0.4032     | -0.32   | 0.7472  |
| Year:MeadowM3           | -17.5286  | 4329.7980  | -0.00   | 0.9968  |
| Year:MeadowM4           | 18.2761   | 6449.1766  | 0.00    | 0.9977  |
| Year:MeadowM5           | -0.0055   | 5434.2327  | -0.00   | 1.0000  |
| Year:MeadowM6           | 0.1440    | 0.3919     | 0.37    | 0.7133  |
| Year:RegionGallatin     | 0.4853    | 0.2995     | 1.62    | 0.1052  |
| MeadowM2:RegionGallatin | 21.5626   | 26103.4248 | 0.00    | 0.9993  |
| MeadowM3:RegionGallatin | 2.7298    | 32901.7814 | 0.00    | 0.9999  |
| MeadowM5:RegionGallatin | 21.0661   | 50253.7560 | 0.00    | 0.9997  |
| MeadowM6:RegionGallatin | -1.1541   | 34961.0554 | -0.00   | 1.0000  |

# 41 Anthocharis sara stella

Table C81: Poisson regression fitted models for Anthocharis sara stella

|    | Region   | Meadow | Model                                  | Sig |
|----|----------|--------|----------------------------------------|-----|
| 1  | Teton    | M1     | $\hat{Y} = 0.139e^{-0.045(YEAR-1997)}$ |     |
| 2  | Teton    | M2     | $\hat{Y} = 0.443e^{-0.057(YEAR-1997)}$ |     |
| 3  | Teton    | M3     | $\hat{Y} = 1.36e^{-0.216(YEAR-1997)}$  |     |
| 5  | Teton    | M5     | $\hat{Y} = 0e^{-16.623(YEAR-1997)}$    |     |
| 6  | Teton    | M6     | $\hat{Y} = 0.001e^{0.645(YEAR-1997)}$  |     |
| 7  | Gallatin | M1     | $\hat{Y} = 1.077e^{0.044(YEAR-1997)}$  |     |
| 8  | Gallatin | M2     | $\hat{Y} = 0.429e^{0.032(YEAR-1997)}$  |     |
| 9  | Gallatin | M3     | $\hat{Y} = 0.266e^{-0.127(YEAR-1997)}$ | *** |
| 10 | Gallatin | M4     | $\hat{Y} = 1.459e^{-0.161(YEAR-1997)}$ |     |
| 11 | Gallatin | M5     | $\hat{Y} = 1e^{-16.534(YEAR-1997)}$    |     |
| 12 | Gallatin | M6     | $\hat{Y} = 0e^{0.734(YEAR-1997)}$      |     |

Null deviance: 85.485 on 80 degrees of freedom  
Residual deviance: 46.122 on 63 degrees of freedom  
(51 observations deleted due to missingness)  
AIC: 126.22

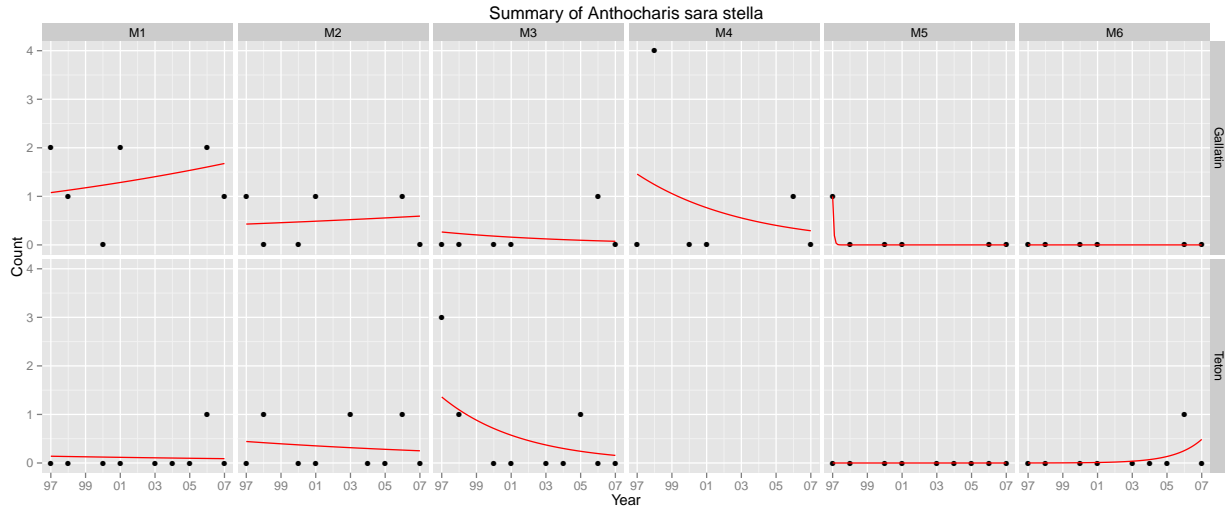

Figure C41: Time series plot of Anthocharis sara stella by region and meadow type

# Anthocharis sara stella

Table C82: Poisson regression parameter estimates for Anthocharis sara stella

|                         | Estimate | Std. Error | z value | P-value |
|-------------------------|----------|------------|---------|---------|
| (Intercept)             | -1.9703  | 1.3015     | -1.51   | 0.1301  |
| Year                    | -0.0446  | 0.1724     | -0.26   | 0.7957  |
| MeadowM2                | 1.1554   | 1.3699     | 0.84    | 0.3990  |
| MeadowM3                | 2.2775   | 1.3915     | 1.64    | 0.1017  |
| MeadowM4                | 0.3034   | 0.8280     | 0.37    | 0.7141  |
| MeadowM5                | -17.3080 | 9312.6269  | -0.00   | 0.9985  |
| MeadowM6                | -5.2001  | 6.8452     | -0.76   | 0.4475  |
| RegionGallatin          | 2.0445   | 1.3227     | 1.55    | 0.1222  |
| Year:MeadowM2           | -0.0119  | 0.1539     | -0.08   | 0.9383  |
| Year:MeadowM3           | -0.1716  | 0.1991     | -0.86   | 0.3888  |
| Year:MeadowM4           | -0.2053  | 0.1740     | -1.18   | 0.2380  |
| Year:MeadowM5           | -16.5780 | 2361.0552  | -0.01   | 0.9944  |
| Year:MeadowM6           | 0.6896   | 0.7582     | 0.91    | 0.3631  |
| Year:RegionGallatin     | 0.0889   | 0.1626     | 0.55    | 0.5843  |
| MeadowM2:RegionGallatin | -2.0759  | 1.3392     | -1.55   | 0.1211  |
| MeadowM3:RegionGallatin | -3.6765  | 1.5567     | -2.36   | 0.0182  |
| MeadowM5:RegionGallatin | 17.2338  | 9312.6270  | 0.00    | 0.9985  |
| MeadowM6:RegionGallatin | -22.5880 | 13159.1945 | -0.00   | 0.9986  |

42 *Boloria frigga*

Table C83: Poisson regression fitted models for *Boloria frigga*

|    | Region   | Meadow | Model                                 | Sig |
|----|----------|--------|---------------------------------------|-----|
| 1  | Teton    | M1     | $\hat{Y} = 4.296e^{0.094(YEAR-1997)}$ |     |
| 2  | Teton    | M2     | $\hat{Y} = 0.019e^{0.354(YEAR-1997)}$ | *** |
| 3  | Teton    | M3     | $\hat{Y} = 0e^{0.211(YEAR-1997)}$     |     |
| 5  | Teton    | M5     | $\hat{Y} = 0e^{0.211(YEAR-1997)}$     |     |
| 6  | Teton    | M6     | $\hat{Y} = 0e^{0.211(YEAR-1997)}$     |     |
| 7  | Gallatin | M1     | $\hat{Y} = 0.445e^{-0.39(YEAR-1997)}$ | *** |
| 8  | Gallatin | M2     | $\hat{Y} = 0.803e^{-0.13(YEAR-1997)}$ | *** |
| 9  | Gallatin | M3     | $\hat{Y} = 0e^{-0.273(YEAR-1997)}$    | *** |
| 10 | Gallatin | M4     | $\hat{Y} = 0e^{0(YEAR-1997)}$         | *** |
| 11 | Gallatin | M5     | $\hat{Y} = 0e^{-0.273(YEAR-1997)}$    | *** |
| 12 | Gallatin | M6     | $\hat{Y} = 0e^{-0.273(YEAR-1997)}$    | *** |

Null deviance: 337.477 on 80 degrees of freedom  
Residual deviance: 57.704 on 63 degrees of freedom  
(51 observations deleted due to missingness)  
AIC: 135.27

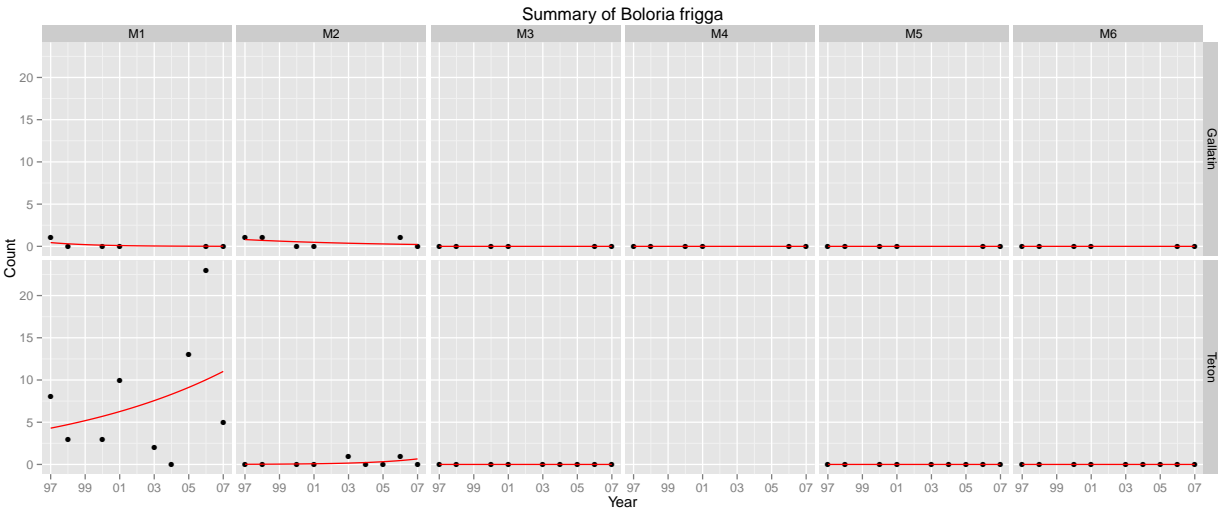

Figure C42: Time series plot of *Boloria frigga* by region and meadow type



## Boloria frigga

Table C84: Poisson regression parameter estimates for Boloria frigga

|                         | Estimate | Std. Error | z value | P-value |
|-------------------------|----------|------------|---------|---------|
| (Intercept)             | 1.4576   | 0.2756     | 5.29    | 0.0000  |
| Year                    | 0.0942   | 0.0391     | 2.41    | 0.0159  |
| MeadowM2                | -5.4257  | 2.4611     | -2.20   | 0.0275  |
| MeadowM3                | -23.0095 | 11871.1075 | -0.00   | 0.9985  |
| MeadowM4                | -19.4924 | 9872.5556  | -0.00   | 0.9984  |
| MeadowM5                | -23.0095 | 11871.1075 | -0.00   | 0.9985  |
| MeadowM6                | -23.0095 | 11871.1075 | -0.00   | 0.9985  |
| RegionGallatin          | -2.2677  | 1.1065     | -2.05   | 0.0404  |
| Year:MeadowM2           | 0.2603   | 0.2896     | 0.90    | 0.3687  |
| Year:MeadowM3           | 0.1166   | 1475.8806  | 0.00    | 0.9999  |
| Year:MeadowM4           | 0.3898   | 1680.8155  | 0.00    | 0.9998  |
| Year:MeadowM5           | 0.1166   | 1475.8806  | 0.00    | 0.9999  |
| Year:MeadowM6           | 0.1166   | 1475.8806  | 0.00    | 0.9999  |
| Year:RegionGallatin     | -0.4840  | 0.3119     | -1.55   | 0.1207  |
| MeadowM2:RegionGallatin | 6.0160   | 2.3785     | 2.53    | 0.0114  |
| MeadowM3:RegionGallatin | 4.4873   | 11162.9412 | 0.00    | 0.9997  |
| MeadowM5:RegionGallatin | 4.4873   | 11162.9412 | 0.00    | 0.9997  |
| MeadowM6:RegionGallatin | 4.4873   | 11162.9412 | 0.00    | 0.9997  |

# 43 Pontia protodice

Table C85: Poisson regression fitted models for Pontia protodice

|    | Region   | Meadow | Model                                  | Sig |
|----|----------|--------|----------------------------------------|-----|
| 1  | Teton    | M1     | $\hat{Y} = 0.483e^{-0.179(YEAR-1997)}$ |     |
| 2  | Teton    | M2     | $\hat{Y} = 0.233e^{0.063(YEAR-1997)}$  |     |
| 3  | Teton    | M3     | $\hat{Y} = 1.375e^{-0.305(YEAR-1997)}$ |     |
| 5  | Teton    | M5     | $\hat{Y} = 0.208e^{0.082(YEAR-1997)}$  |     |
| 6  | Teton    | M6     | $\hat{Y} = 0.679e^{-0.039(YEAR-1997)}$ |     |
| 7  | Gallatin | M1     | $\hat{Y} = 0.884e^{-0.07(YEAR-1997)}$  |     |
| 8  | Gallatin | M2     | $\hat{Y} = 0.062e^{0.172(YEAR-1997)}$  |     |
| 9  | Gallatin | M3     | $\hat{Y} = 1.907e^{-0.196(YEAR-1997)}$ |     |
| 10 | Gallatin | M4     | $\hat{Y} = 1.227e^{-0.101(YEAR-1997)}$ |     |
| 11 | Gallatin | M5     | $\hat{Y} = 0.108e^{0.191(YEAR-1997)}$  |     |
| 12 | Gallatin | M6     | $\hat{Y} = 0.117e^{0.07(YEAR-1997)}$   |     |

Null deviance: 88.206 on 80 degrees of freedom  
Residual deviance: 68.752 on 63 degrees of freedom  
(51 observations deleted due to missingness)  
AIC: 162.42

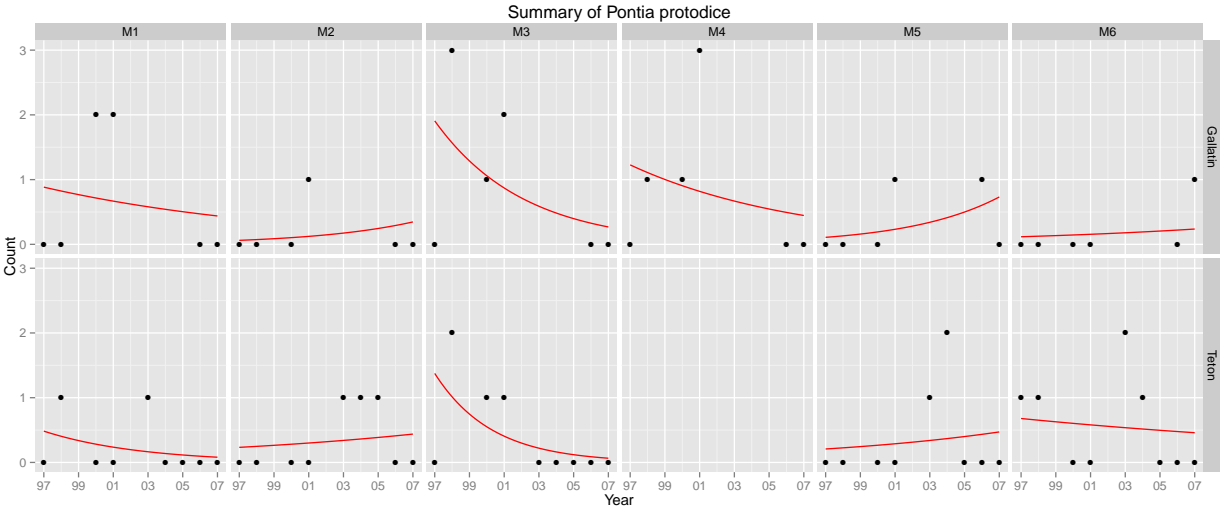

Figure C43: Time series plot of Pontia protodice by region and meadow type

## Pontia protodice

Table C86: Poisson regression parameter estimates for Pontia protodice

|                         | Estimate | Std. Error | z value | P-value |
|-------------------------|----------|------------|---------|---------|
| (Intercept)             | -0.7271  | 0.8670     | -0.84   | 0.4017  |
| Year                    | -0.1793  | 0.1489     | -1.20   | 0.2285  |
| MeadowM2                | -0.7297  | 1.3536     | -0.54   | 0.5898  |
| MeadowM3                | 1.0456   | 0.9995     | 1.05    | 0.2955  |
| MeadowM4                | 0.3285   | 0.9133     | 0.36    | 0.7191  |
| MeadowM5                | -0.8442  | 1.3083     | -0.65   | 0.5187  |
| MeadowM6                | 0.3393   | 1.1087     | 0.31    | 0.7595  |
| RegionGallatin          | 0.6034   | 0.9635     | 0.63    | 0.5311  |
| Year:MeadowM2           | 0.2424   | 0.2002     | 1.21    | 0.2260  |
| Year:MeadowM3           | -0.1259  | 0.1672     | -0.75   | 0.4513  |
| Year:MeadowM4           | -0.0312  | 0.1836     | -0.17   | 0.8652  |
| Year:MeadowM5           | 0.2611   | 0.1846     | 1.41    | 0.1571  |
| Year:MeadowM6           | 0.1402   | 0.1799     | 0.78    | 0.4358  |
| Year:RegionGallatin     | 0.1092   | 0.1231     | 0.89    | 0.3749  |
| MeadowM2:RegionGallatin | -1.9299  | 1.5052     | -1.28   | 0.1998  |
| MeadowM3:RegionGallatin | -0.2764  | 1.0893     | -0.25   | 0.7997  |
| MeadowM5:RegionGallatin | -1.2550  | 1.3303     | -0.94   | 0.3455  |
| MeadowM6:RegionGallatin | -2.3586  | 1.4195     | -1.66   | 0.0966  |

# 44 Glaucopsyche piasus

Table C87: Poisson regression fitted models for Glaucopsyche piasus

|    | Region   | Meadow | Model                                  | Sig |
|----|----------|--------|----------------------------------------|-----|
| 1  | Teton    | M1     | $\hat{Y} = 0.023e^{0.241(YEAR-1997)}$  |     |
| 2  | Teton    | M2     | $\hat{Y} = 0.039e^{0.17(YEAR-1997)}$   |     |
| 3  | Teton    | M3     | $\hat{Y} = 0.012e^{0.323(YEAR-1997)}$  |     |
| 5  | Teton    | M5     | $\hat{Y} = 1.02e^{0.085(YEAR-1997)}$   |     |
| 6  | Teton    | M6     | $\hat{Y} = 0.275e^{0.23(YEAR-1997)}$   |     |
| 7  | Gallatin | M1     | $\hat{Y} = 0.302e^{-0.175(YEAR-1997)}$ |     |
| 8  | Gallatin | M2     | $\hat{Y} = 0e^{-0.246(YEAR-1997)}$     |     |
| 9  | Gallatin | M3     | $\hat{Y} = 0e^{-0.093(YEAR-1997)}$     |     |
| 10 | Gallatin | M4     | $\hat{Y} = 0.194e^{-0.036(YEAR-1997)}$ |     |
| 11 | Gallatin | M5     | $\hat{Y} = 0.409e^{-0.331(YEAR-1997)}$ |     |
| 12 | Gallatin | M6     | $\hat{Y} = 0e^{-0.185(YEAR-1997)}$     |     |

Null deviance: 115.395 on 80 degrees of freedom  
Residual deviance: 51.462 on 63 degrees of freedom  
(51 observations deleted due to missingness)  
AIC: 126.92

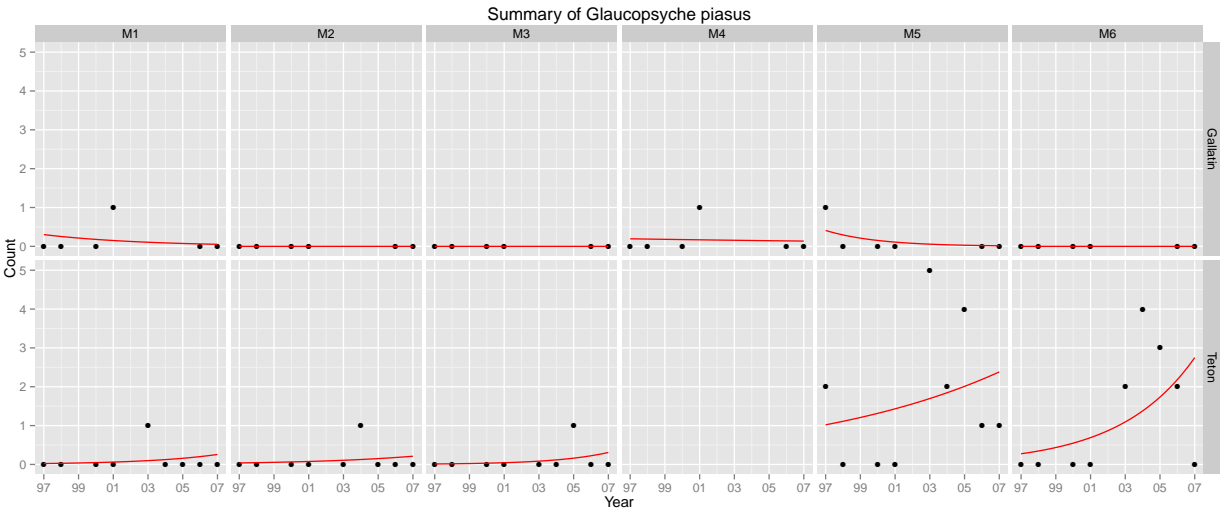

Figure C44: Time series plot of Glaucopsyche piasus by region and meadow type

# Glaucopsyche piasus

Table C88: Poisson regression parameter estimates for Glaucopsyche piasus

|                         | Estimate | Std. Error | z value | P-value |
|-------------------------|----------|------------|---------|---------|
| (Intercept)             | -3.7661  | 2.6518     | -1.42   | 0.1555  |
| Year                    | 0.2405   | 0.3265     | 0.74    | 0.4613  |
| MeadowM2                | 0.5158   | 3.7481     | 0.14    | 0.8905  |
| MeadowM3                | -0.6414  | 4.5561     | -0.14   | 0.8880  |
| MeadowM4                | -0.4421  | 1.9383     | -0.23   | 0.8196  |
| MeadowM5                | 3.7858   | 2.6776     | 1.41    | 0.1574  |
| MeadowM6                | 2.4737   | 2.8044     | 0.88    | 0.3777  |
| RegionGallatin          | 2.5701   | 2.6982     | 0.95    | 0.3408  |
| Year:MeadowM2           | -0.0709  | 0.4789     | -0.15   | 0.8822  |
| Year:MeadowM3           | 0.0825   | 0.5527     | 0.15    | 0.8813  |
| Year:MeadowM4           | 0.1390   | 0.4074     | 0.34    | 0.7329  |
| Year:MeadowM5           | -0.1557  | 0.3305     | -0.47   | 0.6375  |
| Year:MeadowM6           | -0.0101  | 0.3463     | -0.03   | 0.9767  |
| Year:RegionGallatin     | -0.4157  | 0.3568     | -1.16   | 0.2440  |
| MeadowM2:RegionGallatin | -17.7882 | 3694.0458  | -0.00   | 0.9962  |
| MeadowM3:RegionGallatin | -17.0838 | 3805.8911  | -0.00   | 0.9964  |
| MeadowM5:RegionGallatin | -3.4828  | 2.5700     | -1.36   | 0.1754  |
| MeadowM6:RegionGallatin | -19.9014 | 3737.5979  | -0.01   | 0.9958  |

45 *Limnitis weidemeyerii*

Table C89: Poisson regression fitted models for *Limnitis weidemeyerii*

|    | Region   | Meadow | Model                                  | Sig |
|----|----------|--------|----------------------------------------|-----|
| 1  | Teton    | M1     | $\hat{Y} = 0.058e^{0.263(YEAR-1997)}$  |     |
| 2  | Teton    | M2     | $\hat{Y} = 0.152e^{0.131(YEAR-1997)}$  |     |
| 3  | Teton    | M3     | $\hat{Y} = 0.009e^{0.444(YEAR-1997)}$  |     |
| 5  | Teton    | M5     | $\hat{Y} = 1.117e^{-0.157(YEAR-1997)}$ |     |
| 6  | Teton    | M6     | $\hat{Y} = 0e^{0.259(YEAR-1997)}$      |     |
| 7  | Gallatin | M1     | $\hat{Y} = 0e^{-0.368(YEAR-1997)}$     |     |
| 8  | Gallatin | M2     | $\hat{Y} = 0.505e^{-0.5(YEAR-1997)}$   |     |
| 9  | Gallatin | M3     | $\hat{Y} = 0e^{-0.187(YEAR-1997)}$     |     |
| 10 | Gallatin | M4     | $\hat{Y} = 0.008e^{0.425(YEAR-1997)}$  |     |
| 11 | Gallatin | M5     | $\hat{Y} = 0e^{-0.788(YEAR-1997)}$     |     |
| 12 | Gallatin | M6     | $\hat{Y} = 0e^{-0.372(YEAR-1997)}$     |     |

Null deviance: 62.729 on 80 degrees of freedom  
Residual deviance: 35.867 on 63 degrees of freedom  
(51 observations deleted due to missingness)  
AIC: 96.086

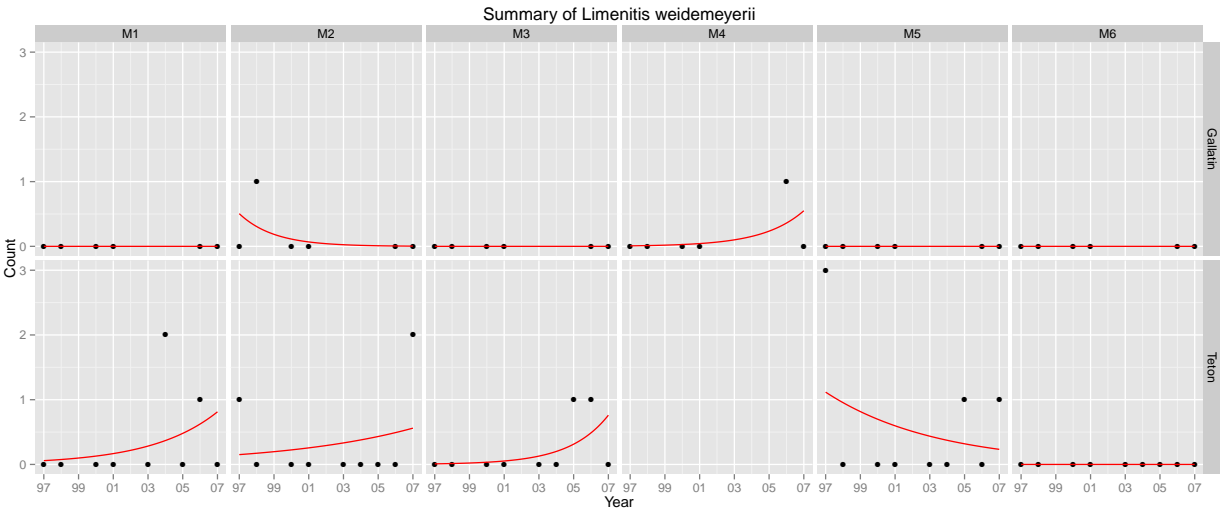

Figure C45: Time series plot of *Limnitis weidemeyerii* by region and meadow type

# Limnitis weidemeyerii

Table C90: Poisson regression parameter estimates for Limnitis weidemeyerii

|                         | Estimate | Std. Error | z value | P-value |
|-------------------------|----------|------------|---------|---------|
| (Intercept)             | -2.8396  | 1.8778     | -1.51   | 0.1305  |
| Year                    | 0.2632   | 0.2331     | 1.13    | 0.2588  |
| MeadowM2                | 0.9537   | 2.3465     | 0.41    | 0.6844  |
| MeadowM3                | -1.8761  | 3.8490     | -0.49   | 0.6260  |
| MeadowM4                | 14.2224  | 5515.9392  | 0.00    | 0.9979  |
| MeadowM5                | 2.9500   | 1.9941     | 1.48    | 0.1391  |
| MeadowM6                | -19.0858 | 13719.1840 | -0.00   | 0.9989  |
| RegionGallatin          | -16.2306 | 5515.9375  | -0.00   | 0.9977  |
| Year:MeadowM2           | -0.1325  | 0.3023     | -0.44   | 0.6612  |
| Year:MeadowM3           | 0.1810   | 0.4513     | 0.40    | 0.6884  |
| Year:MeadowM4           | 0.7929   | 0.8909     | 0.89    | 0.3735  |
| Year:MeadowM5           | -0.4199  | 0.2714     | -1.55   | 0.1218  |
| Year:MeadowM6           | -0.0040  | 1673.8775  | -0.00   | 1.0000  |
| Year:RegionGallatin     | -0.6311  | 0.7012     | -0.90   | 0.3681  |
| MeadowM2:RegionGallatin | 17.4324  | 5515.9376  | 0.00    | 0.9975  |
| MeadowM3:RegionGallatin | 1.5444   | 7807.8772  | 0.00    | 0.9998  |
| MeadowM5:RegionGallatin | -2.1541  | 7097.6065  | -0.00   | 0.9998  |
| MeadowM6:RegionGallatin | 18.9672  | 14141.2399 | 0.00    | 0.9989  |

# 46 Colias interior

Table C91: Poisson regression fitted models for Colias interior

|    | Region   | Meadow | Model                                  | Sig |
|----|----------|--------|----------------------------------------|-----|
| 1  | Teton    | M1     | $\hat{Y} = 3.827e^{-0.218(YEAR-1997)}$ |     |
| 2  | Teton    | M2     | $\hat{Y} = 0.547e^{-0.218(YEAR-1997)}$ |     |
| 3  | Teton    | M3     | $\hat{Y} = 0e^{-0.036(YEAR-1997)}$     |     |
| 5  | Teton    | M5     | $\hat{Y} = 0.039e^{0.17(YEAR-1997)}$   |     |
| 6  | Teton    | M6     | $\hat{Y} = 0e^{-0.036(YEAR-1997)}$     |     |
| 7  | Gallatin | M1     | $\hat{Y} = 0e^{-0.136(YEAR-1997)}$     |     |
| 8  | Gallatin | M2     | $\hat{Y} = 0e^{-0.136(YEAR-1997)}$     |     |
| 9  | Gallatin | M3     | $\hat{Y} = 0e^{0.046(YEAR-1997)}$      |     |
| 10 | Gallatin | M4     | $\hat{Y} = 0e^{0(YEAR-1997)}$          |     |
| 11 | Gallatin | M5     | $\hat{Y} = 0e^{0.251(YEAR-1997)}$      |     |
| 12 | Gallatin | M6     | $\hat{Y} = 0e^{0.046(YEAR-1997)}$      |     |

Null deviance: 129.748 on 80 degrees of freedom  
Residual deviance: 66.559 on 63 degrees of freedom  
(51 observations deleted due to missingness)  
AIC: 111.66

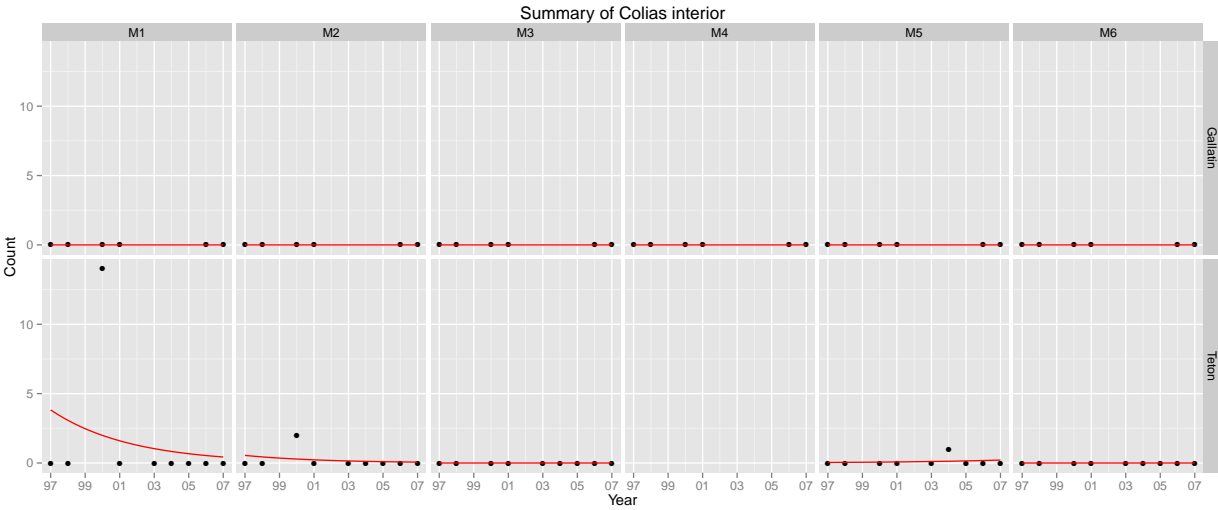

Figure C46: Time series plot of Colias interior by region and meadow type



## Colias interior

Table C92: Poisson regression parameter estimates for Colias interior

|                         | Estimate | Std. Error | z value | P-value |
|-------------------------|----------|------------|---------|---------|
| (Intercept)             | 1.3420   | 0.3763     | 3.57    | 0.0004  |
| Year                    | -0.2180  | 0.0883     | -2.47   | 0.0136  |
| MeadowM2                | -1.9459  | 1.0643     | -1.83   | 0.0675  |
| MeadowM3                | -21.3957 | 7531.9824  | -0.00   | 0.9977  |
| MeadowM4                | -1.2441  | 11016.7073 | -0.00   | 0.9999  |
| MeadowM5                | -4.5923  | 2.6754     | -1.72   | 0.0861  |
| MeadowM6                | -21.3957 | 7531.9824  | -0.00   | 0.9977  |
| RegionGallatin          | -20.4005 | 4888.8124  | -0.00   | 0.9967  |
| Year:MeadowM2           | 0.0000   | 0.2497     | 0.00    | 1.0000  |
| Year:MeadowM3           | 0.1824   | 1139.4721  | 0.00    | 0.9999  |
| Year:MeadowM4           | 0.1362   | 1854.0403  | 0.00    | 0.9999  |
| Year:MeadowM5           | 0.3876   | 0.3614     | 1.07    | 0.2835  |
| Year:MeadowM6           | 0.1824   | 1139.4721  | 0.00    | 0.9999  |
| Year:RegionGallatin     | 0.0818   | 782.5119   | 0.00    | 0.9999  |
| MeadowM2:RegionGallatin | 1.3262   | 7366.4376  | 0.00    | 0.9999  |
| MeadowM3:RegionGallatin | 20.0447  | 9111.9602  | 0.00    | 0.9982  |
| MeadowM5:RegionGallatin | 2.2875   | 7641.3409  | 0.00    | 0.9998  |
| MeadowM6:RegionGallatin | 20.0447  | 9111.9602  | 0.00    | 0.9982  |

47 *Papilio rutulus*

Table C93: Poisson regression fitted models for *Papilio rutulus*

|    | Region   | Meadow | Model                                  | Sig |
|----|----------|--------|----------------------------------------|-----|
| 1  | Teton    | M1     | $\hat{Y} = 0.002e^{0.645(YEAR-1997)}$  |     |
| 2  | Teton    | M2     | $\hat{Y} = 0.777e^{-0.03(YEAR-1997)}$  |     |
| 3  | Teton    | M3     | $\hat{Y} = 1.542e^{-0.046(YEAR-1997)}$ |     |
| 5  | Teton    | M5     | $\hat{Y} = 0.913e^{-0.256(YEAR-1997)}$ |     |
| 6  | Teton    | M6     | $\hat{Y} = 0e^{0.304(YEAR-1997)}$      |     |
| 7  | Gallatin | M1     | $\hat{Y} = 0.52e^{-0.12(YEAR-1997)}$   |     |
| 8  | Gallatin | M2     | $\hat{Y} = 0e^{-0.794(YEAR-1997)}$     |     |
| 9  | Gallatin | M3     | $\hat{Y} = 0e^{-0.811(YEAR-1997)}$     |     |
| 10 | Gallatin | M4     | $\hat{Y} = 0e^{0(YEAR-1997)}$          |     |
| 11 | Gallatin | M5     | $\hat{Y} = 0e^{-1.021(YEAR-1997)}$     |     |
| 12 | Gallatin | M6     | $\hat{Y} = 0e^{-0.461(YEAR-1997)}$     |     |

Null deviance: 85.825 on 80 degrees of freedom  
Residual deviance: 37.476 on 63 degrees of freedom  
(51 observations deleted due to missingness)  
AIC: 110.53

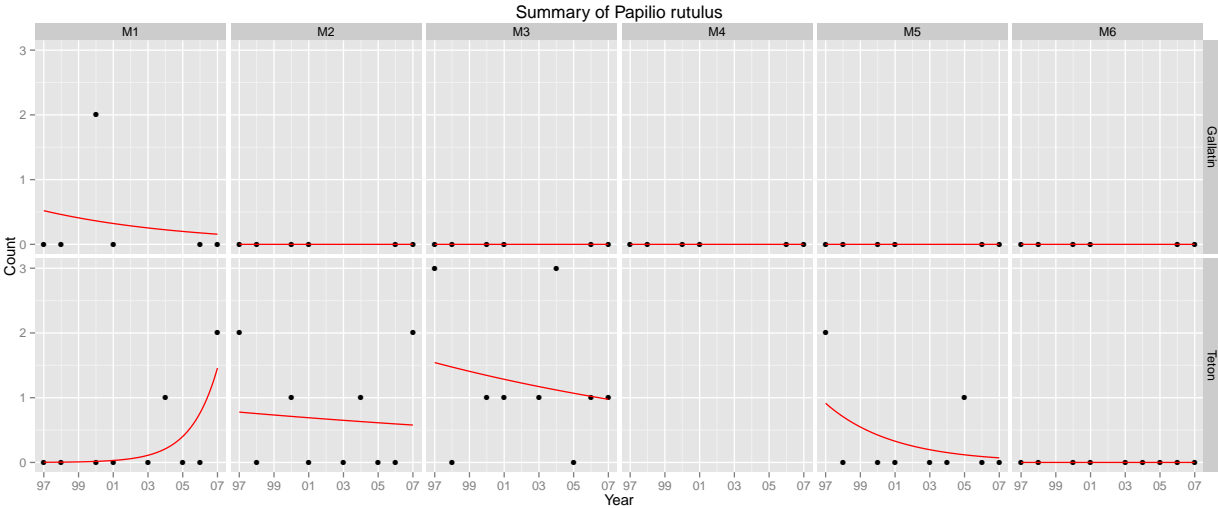

Figure C47: Time series plot of *Papilio rutulus* by region and meadow type

# Papilio rutulus

Table C94: Poisson regression parameter estimates for *Papilio rutulus*

|                         | Estimate | Std. Error | z value | P-value |
|-------------------------|----------|------------|---------|---------|
| (Intercept)             | -6.0717  | 3.8800     | -1.56   | 0.1176  |
| Year                    | 0.6449   | 0.4263     | 1.51    | 0.1303  |
| MeadowM2                | 5.8199   | 3.9484     | 1.47    | 0.1405  |
| MeadowM3                | 6.5051   | 3.9156     | 1.66    | 0.0966  |
| MeadowM4                | -19.6485 | 9872.5556  | -0.00   | 0.9984  |
| MeadowM5                | 5.9812   | 3.9589     | 1.51    | 0.1308  |
| MeadowM6                | -16.1950 | 15369.9079 | -0.00   | 0.9992  |
| RegionGallatin          | 5.4176   | 3.9981     | 1.36    | 0.1754  |
| Year:MeadowM2           | -0.6747  | 0.4433     | -1.52   | 0.1280  |
| Year:MeadowM3           | -0.6908  | 0.4356     | -1.59   | 0.1128  |
| Year:MeadowM4           | 0.1198   | 1680.8155  | 0.00    | 0.9999  |
| Year:MeadowM5           | -0.9011  | 0.4710     | -1.91   | 0.0558  |
| Year:MeadowM6           | -0.3410  | 1842.0935  | -0.00   | 0.9999  |
| Year:RegionGallatin     | -0.7647  | 0.4791     | -1.60   | 0.1105  |
| MeadowM2:RegionGallatin | -23.7856 | 5318.5950  | -0.00   | 0.9964  |
| MeadowM3:RegionGallatin | -24.4564 | 5304.6272  | -0.00   | 0.9963  |
| MeadowM5:RegionGallatin | -23.6542 | 4850.1450  | -0.00   | 0.9961  |
| MeadowM6:RegionGallatin | -2.2082  | 14673.9662 | -0.00   | 0.9999  |

# 48 Oeneis chryxus chryxus

Table C95: Poisson regression fitted models for Oeneis chryxus chryxus

|    | Region   | Meadow | Model                                  | Sig |
|----|----------|--------|----------------------------------------|-----|
| 1  | Teton    | M1     | $\hat{Y} = 0e^{16.723(YEAR-1997)}$     |     |
| 2  | Teton    | M2     | $\hat{Y} = 0e^{0.324(YEAR-1997)}$      |     |
| 3  | Teton    | M3     | $\hat{Y} = 0.684e^{0.113(YEAR-1997)}$  |     |
| 5  | Teton    | M5     | $\hat{Y} = 0e^{0.078(YEAR-1997)}$      |     |
| 6  | Teton    | M6     | $\hat{Y} = 0e^{0.097(YEAR-1997)}$      |     |
| 7  | Gallatin | M1     | $\hat{Y} = 0e^{16.574(YEAR-1997)}$     |     |
| 8  | Gallatin | M2     | $\hat{Y} = 0.121e^{0.175(YEAR-1997)}$  |     |
| 9  | Gallatin | M3     | $\hat{Y} = 0.389e^{-0.036(YEAR-1997)}$ |     |
| 10 | Gallatin | M4     | $\hat{Y} = 0.709e^{-0.09(YEAR-1997)}$  |     |
| 11 | Gallatin | M5     | $\hat{Y} = 3.537e^{-0.07(YEAR-1997)}$  |     |
| 12 | Gallatin | M6     | $\hat{Y} = 1.031e^{-0.051(YEAR-1997)}$ |     |

Null deviance: 142.288 on 80 degrees of freedom  
Residual deviance: 59.003 on 63 degrees of freedom  
(51 observations deleted due to missingness)  
AIC: 141.79

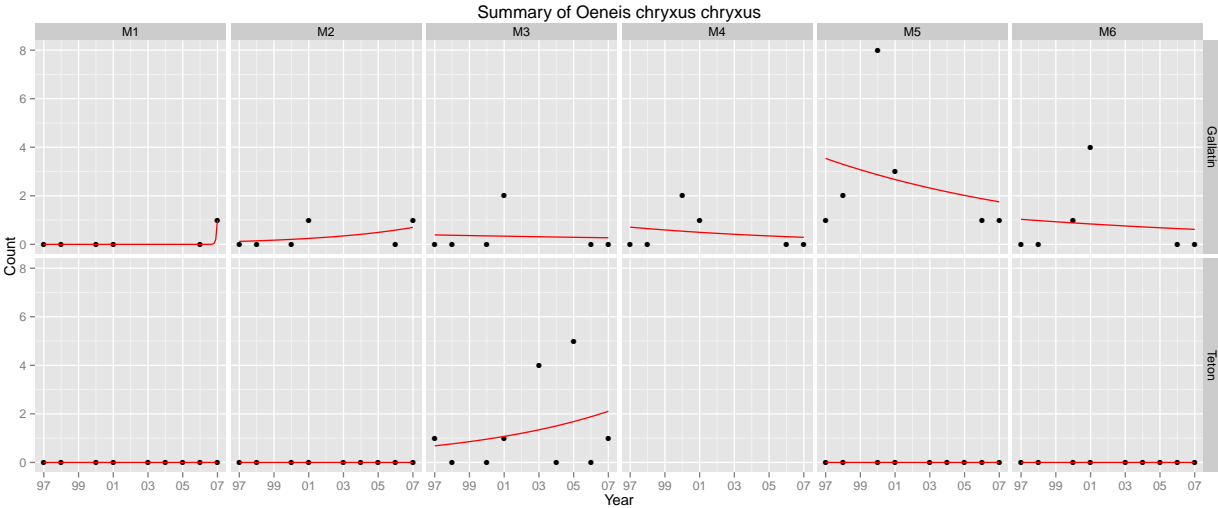

Figure C48: Time series plot of Oeneis chryxus chryxus by region and meadow type

# Oeneis chryxus chryxus

Table C96: Poisson regression parameter estimates for Oeneis chryxus chryxus

|                         | Estimate  | Std. Error | z value | P-value |
|-------------------------|-----------|------------|---------|---------|
| (Intercept)             | -186.5095 | 25834.4210 | -0.01   | 0.9942  |
| Year                    | 16.7228   | 2409.1269  | 0.01    | 0.9945  |
| MeadowM2                | 162.1045  | 29057.2226 | 0.01    | 0.9955  |
| MeadowM3                | 186.1292  | 25834.4209 | 0.01    | 0.9943  |
| MeadowM4                | 165.3960  | 24091.2683 | 0.01    | 0.9945  |
| MeadowM5                | 163.8753  | 29039.4101 | 0.01    | 0.9955  |
| MeadowM6                | 163.6777  | 29288.3464 | 0.01    | 0.9955  |
| RegionGallatin          | 20.7691   | 9328.8900  | 0.00    | 0.9982  |
| Year:MeadowM2           | -16.3989  | 2409.1269  | -0.01   | 0.9946  |
| Year:MeadowM3           | -16.6102  | 2409.1269  | -0.01   | 0.9945  |
| Year:MeadowM4           | -16.6636  | 2409.1269  | -0.01   | 0.9945  |
| Year:MeadowM5           | -16.6443  | 2409.1269  | -0.01   | 0.9945  |
| Year:MeadowM6           | -16.6254  | 2409.1269  | -0.01   | 0.9945  |
| Year:RegionGallatin     | -0.1487   | 0.2152     | -0.69   | 0.4896  |
| MeadowM2:RegionGallatin | 1.5260    | 16246.0169 | 0.00    | 0.9999  |
| MeadowM3:RegionGallatin | -21.3339  | 9328.8898  | -0.00   | 0.9982  |
| MeadowM5:RegionGallatin | 3.1284    | 16214.1365 | 0.00    | 0.9998  |
| MeadowM6:RegionGallatin | 2.0934    | 16655.8733 | 0.00    | 0.9999  |

# 49 Parnassius clodius

Table C97: Poisson regression fitted models for Parnassius clodius

|    | Region   | Meadow | Model                                  | Sig |
|----|----------|--------|----------------------------------------|-----|
| 1  | Teton    | M1     | $\hat{Y} = 0.487e^{0.136(YEAR-1997)}$  |     |
| 2  | Teton    | M2     | $\hat{Y} = 0.547e^{-0.218(YEAR-1997)}$ |     |
| 3  | Teton    | M3     | $\hat{Y} = 1.801e^{-0.043(YEAR-1997)}$ |     |
| 5  | Teton    | M5     | $\hat{Y} = 0.503e^{0.097(YEAR-1997)}$  |     |
| 6  | Teton    | M6     | $\hat{Y} = 0.667e^{0(YEAR-1997)}$      |     |
| 7  | Gallatin | M1     | $\hat{Y} = 0.961e^{0.12(YEAR-1997)}$   |     |
| 8  | Gallatin | M2     | $\hat{Y} = 0e^{-0.234(YEAR-1997)}$     |     |
| 9  | Gallatin | M3     | $\hat{Y} = 0e^{-0.06(YEAR-1997)}$      |     |
| 10 | Gallatin | M4     | $\hat{Y} = 6.938e^{-0.034(YEAR-1997)}$ | *** |
| 11 | Gallatin | M5     | $\hat{Y} = 0.661e^{0.081(YEAR-1997)}$  |     |
| 12 | Gallatin | M6     | $\hat{Y} = 0e^{-0.016(YEAR-1997)}$     |     |

Null deviance: 225.30 on 80 degrees of freedom  
Residual deviance: 100.16 on 63 degrees of freedom  
(51 observations deleted due to missingness)  
AIC: 221.89

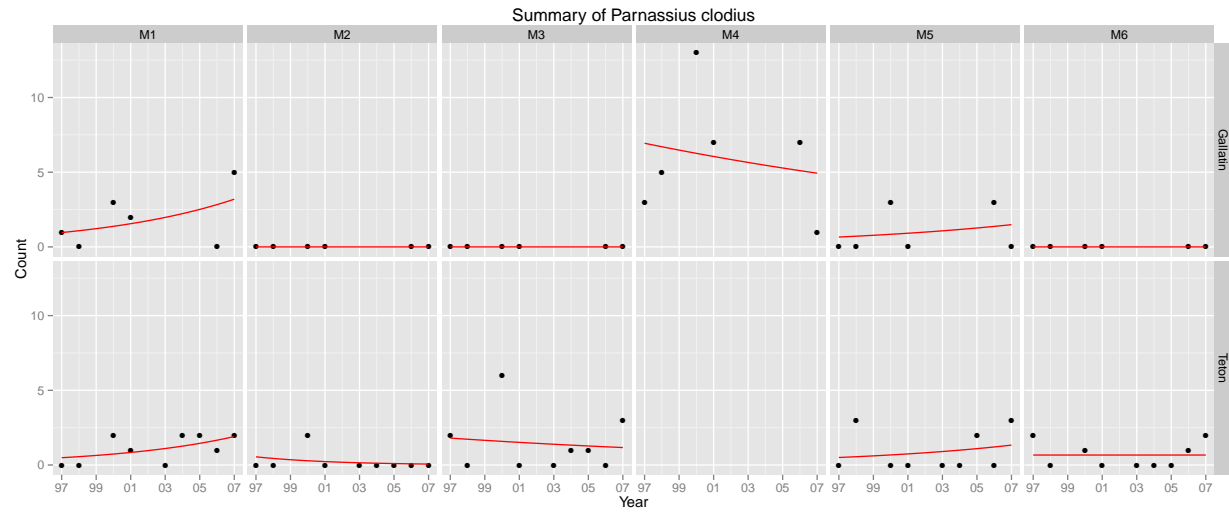

Figure C49: Time series plot of Parnassius clodius by region and meadow type

# Parnassius clodius

Table C98: Poisson regression parameter estimates for Parnassius clodius

|                         | Estimate | Std. Error | z value | P-value |
|-------------------------|----------|------------|---------|---------|
| (Intercept)             | -0.7189  | 0.6865     | -1.05   | 0.2950  |
| Year                    | 0.1362   | 0.0907     | 1.50    | 0.1332  |
| MeadowM2                | 0.1150   | 1.2093     | 0.10    | 0.9242  |
| MeadowM3                | 1.3074   | 0.8414     | 1.55    | 0.1202  |
| MeadowM4                | 1.9767   | 0.6039     | 3.27    | 0.0011  |
| MeadowM5                | 0.0310   | 0.8126     | 0.04    | 0.9695  |
| MeadowM6                | 0.3135   | 1.0318     | 0.30    | 0.7613  |
| RegionGallatin          | 0.6792   | 0.7936     | 0.86    | 0.3921  |
| Year:MeadowM2           | -0.3542  | 0.2506     | -1.41   | 0.1575  |
| Year:MeadowM3           | -0.1796  | 0.1226     | -1.46   | 0.1430  |
| Year:MeadowM4           | -0.1541  | 0.0866     | -1.78   | 0.0750  |
| Year:MeadowM5           | -0.0389  | 0.1011     | -0.38   | 0.7005  |
| Year:MeadowM6           | -0.1362  | 0.1524     | -0.89   | 0.3714  |
| Year:RegionGallatin     | -0.0162  | 0.1010     | -0.16   | 0.8727  |
| MeadowM2:RegionGallatin | -17.3156 | 1975.1833  | -0.01   | 0.9930  |
| MeadowM3:RegionGallatin | -19.3141 | 2319.5165  | -0.01   | 0.9934  |
| MeadowM5:RegionGallatin | -0.4048  | 0.6990     | -0.58   | 0.5626  |
| MeadowM6:RegionGallatin | -18.4667 | 2289.4471  | -0.01   | 0.9936  |

## 50 Pieris napi morph 1

Table C99: Poisson regression fitted models for *Pieris napi* morph 1

|    | Region   | Meadow | Model                                  | Sig |
|----|----------|--------|----------------------------------------|-----|
| 1  | Teton    | M1     | $\hat{Y} = 2.413e^{-0.048(YEAR-1997)}$ |     |
| 2  | Teton    | M2     | $\hat{Y} = 1.49e^{0.021(YEAR-1997)}$   |     |
| 3  | Teton    | M3     | $\hat{Y} = 0.599e^{0.02(YEAR-1997)}$   | *** |
| 5  | Teton    | M5     | $\hat{Y} = 0.724e^{-0.328(YEAR-1997)}$ |     |
| 6  | Teton    | M6     | $\hat{Y} = 0.6e^{-0.06(YEAR-1997)}$    |     |
| 7  | Gallatin | M1     | $\hat{Y} = 5.345e^{-0.015(YEAR-1997)}$ | *** |
| 8  | Gallatin | M2     | $\hat{Y} = 2.947e^{0.054(YEAR-1997)}$  | *** |
| 9  | Gallatin | M3     | $\hat{Y} = 2.187e^{0.053(YEAR-1997)}$  | *** |
| 10 | Gallatin | M4     | $\hat{Y} = 1.109e^{-0.024(YEAR-1997)}$ | *** |
| 11 | Gallatin | M5     | $\hat{Y} = 1.547e^{-0.295(YEAR-1997)}$ | *** |
| 12 | Gallatin | M6     | $\hat{Y} = 0.562e^{-0.027(YEAR-1997)}$ | *** |

Null deviance: 246.01 on 80 degrees of freedom

Residual deviance: 147.04 on 63 degrees of freedom

(51 observations deleted due to missingness)

AIC: 298.99

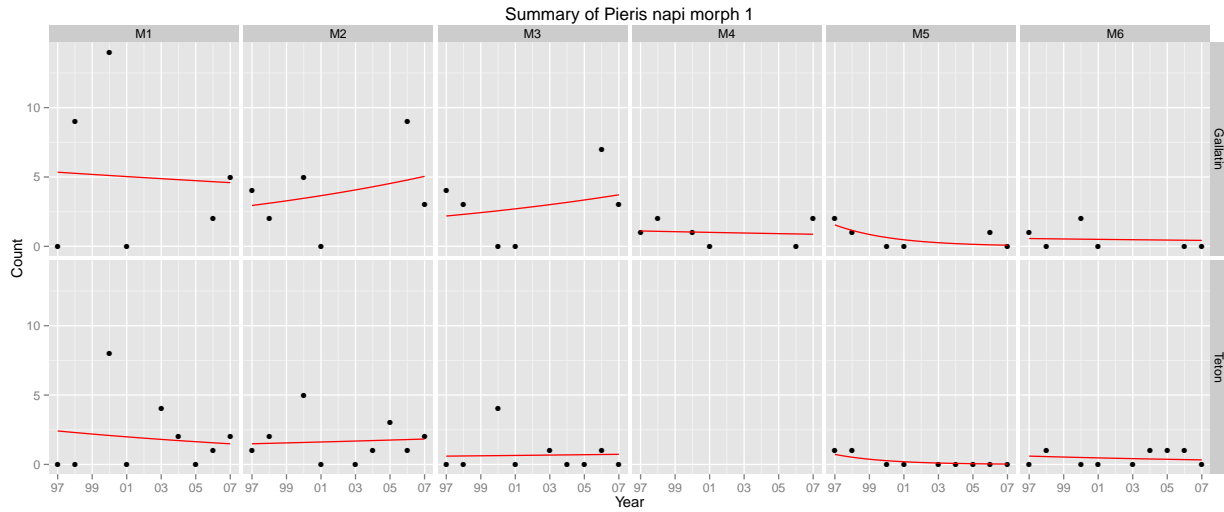

Figure C50: Time series plot of *Pieris napi* marginalis by region and meadow type



# Pieris napi morph 1

Table C100: Poisson regression parameter estimates for Pieris napi morph 1

|                         | Estimate | Std. Error | z value | P-value |
|-------------------------|----------|------------|---------|---------|
| (Intercept)             | 0.8810   | 0.3601     | 2.45    | 0.0144  |
| Year                    | -0.0484  | 0.0556     | -0.87   | 0.3837  |
| MeadowM2                | -0.4822  | 0.4743     | -1.02   | 0.3094  |
| MeadowM3                | -1.3943  | 0.6033     | -2.31   | 0.0208  |
| MeadowM4                | -1.5729  | 0.6686     | -2.35   | 0.0187  |
| MeadowM5                | -1.2044  | 0.8629     | -1.40   | 0.1628  |
| MeadowM6                | -1.3915  | 0.7759     | -1.79   | 0.0729  |
| RegionGallatin          | 0.7951   | 0.3985     | 2.00    | 0.0460  |
| Year:MeadowM2           | 0.0690   | 0.0602     | 1.15    | 0.2517  |
| Year:MeadowM3           | 0.0682   | 0.0694     | 0.98    | 0.3259  |
| Year:MeadowM4           | -0.0087  | 0.1188     | -0.07   | 0.9419  |
| Year:MeadowM5           | -0.2800  | 0.1780     | -1.57   | 0.1157  |
| Year:MeadowM6           | -0.0117  | 0.1158     | -0.10   | 0.9193  |
| Year:RegionGallatin     | 0.0332   | 0.0556     | 0.60    | 0.5500  |
| MeadowM2:RegionGallatin | -0.1133  | 0.4528     | -0.25   | 0.8025  |
| MeadowM3:RegionGallatin | 0.5005   | 0.5662     | 0.88    | 0.3767  |
| MeadowM5:RegionGallatin | -0.0356  | 0.9330     | -0.04   | 0.9695  |
| MeadowM6:RegionGallatin | -0.8617  | 0.8242     | -1.05   | 0.2958  |

## 51 *Lycaena cupreus*

Table C101: Poisson regression fitted models for *Lycaena cupreus*

|    | Region   | Meadow | Model                                  | Sig |
|----|----------|--------|----------------------------------------|-----|
| 1  | Teton    | M1     | $\hat{Y} = 0.001e^{0.645(YEAR-1997)}$  |     |
| 2  | Teton    | M2     | $\hat{Y} = 0.012e^{0.323(YEAR-1997)}$  |     |
| 3  | Teton    | M3     | $\hat{Y} = 0e^{0.083(YEAR-1997)}$      |     |
| 5  | Teton    | M5     | $\hat{Y} = 0e^{0.146(YEAR-1997)}$      |     |
| 6  | Teton    | M6     | $\hat{Y} = 2.504e^{-0.162(YEAR-1997)}$ |     |
| 7  | Gallatin | M1     | $\hat{Y} = 0e^{0.463(YEAR-1997)}$      |     |
| 8  | Gallatin | M2     | $\hat{Y} = 0e^{0.141(YEAR-1997)}$      |     |
| 9  | Gallatin | M3     | $\hat{Y} = 0e^{-0.099(YEAR-1997)}$     |     |
| 10 | Gallatin | M4     | $\hat{Y} = 0e^{0(YEAR-1997)}$          |     |
| 11 | Gallatin | M5     | $\hat{Y} = 0.194e^{-0.036(YEAR-1997)}$ |     |
| 12 | Gallatin | M6     | $\hat{Y} = 0e^{-0.344(YEAR-1997)}$     |     |

Null deviance: 87.484 on 80 degrees of freedom

Residual deviance: 40.719 on 63 degrees of freedom

(51 observations deleted due to missingness)

AIC: 89.792

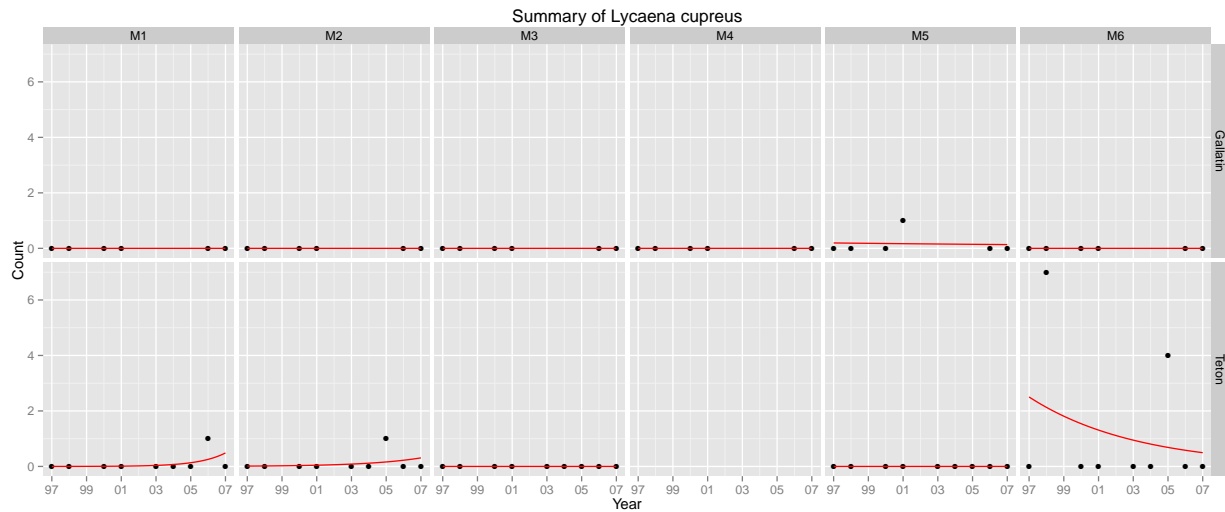

Figure C51: Time series plot of *Lycaena cupreus* by region and meadow type

# Lycaena cupreus

Table C102: Poisson regression parameter estimates for Lycaena cupreus

|                         | Estimate | Std. Error | z value | P-value |
|-------------------------|----------|------------|---------|---------|
| (Intercept)             | -7.1703  | 6.7203     | -1.07   | 0.2860  |
| Year                    | 0.6449   | 0.7384     | 0.87    | 0.3824  |
| MeadowM2                | 2.7628   | 7.6739     | 0.36    | 0.7188  |
| MeadowM3                | -13.5917 | 9521.3696  | -0.00   | 0.9989  |
| MeadowM4                | 3.0855   | 14154.2022 | 0.00    | 0.9998  |
| MeadowM5                | -13.9908 | 8171.5234  | -0.00   | 0.9986  |
| MeadowM6                | 8.0881   | 6.7353     | 1.20    | 0.2298  |
| RegionGallatin          | -16.2177 | 10142.6846 | -0.00   | 0.9987  |
| Year:MeadowM2           | -0.3219  | 0.8626     | -0.37   | 0.7091  |
| Year:MeadowM3           | -0.5624  | 1291.2438  | -0.00   | 0.9997  |
| Year:MeadowM4           | -0.4631  | 1925.0686  | -0.00   | 0.9998  |
| Year:MeadowM5           | -0.4993  | 938.4819   | -0.00   | 0.9996  |
| Year:MeadowM6           | -0.8069  | 0.7444     | -1.08   | 0.2784  |
| Year:RegionGallatin     | -0.1818  | 938.4817   | -0.00   | 0.9998  |
| MeadowM2:RegionGallatin | -0.3206  | 8381.4899  | -0.00   | 1.0000  |
| MeadowM3:RegionGallatin | 17.0882  | 11269.5845 | 0.00    | 0.9988  |
| MeadowM5:RegionGallatin | 35.7406  | 7759.3888  | 0.00    | 0.9963  |
| MeadowM6:RegionGallatin | -3.7642  | 10504.6345 | -0.00   | 0.9997  |

52 Pontia occidentalis

Table C103: Poisson regression fitted models for Pontia occidentalis

|    | Region   | Meadow | Model                                  | Sig |
|----|----------|--------|----------------------------------------|-----|
| 1  | Teton    | M1     | $\hat{Y} = 0.116e^{0.11(YEAR-1997)}$   |     |
| 2  | Teton    | M2     | $\hat{Y} = 0.308e^{-0.261(YEAR-1997)}$ |     |
| 3  | Teton    | M3     | $\hat{Y} = 0.012e^{0.323(YEAR-1997)}$  |     |
| 5  | Teton    | M5     | $\hat{Y} = 0.329e^{-0.286(YEAR-1997)}$ |     |
| 6  | Teton    | M6     | $\hat{Y} = 0e^{0.049(YEAR-1997)}$      |     |
| 7  | Gallatin | M1     | $\hat{Y} = 0.33e^{0.002(YEAR-1997)}$   |     |
| 8  | Gallatin | M2     | $\hat{Y} = 0.432e^{-0.369(YEAR-1997)}$ |     |
| 9  | Gallatin | M3     | $\hat{Y} = 0e^{0.215(YEAR-1997)}$      |     |
| 10 | Gallatin | M4     | $\hat{Y} = 0.195e^{0.102(YEAR-1997)}$  |     |
| 11 | Gallatin | M5     | $\hat{Y} = 0.894e^{-0.394(YEAR-1997)}$ |     |
| 12 | Gallatin | M6     | $\hat{Y} = 0e^{-0.058(YEAR-1997)}$     |     |

Null deviance: 48.602 on 80 degrees of freedom  
Residual deviance: 33.174 on 63 degrees of freedom  
(51 observations deleted due to missingness)  
AIC: 91.788

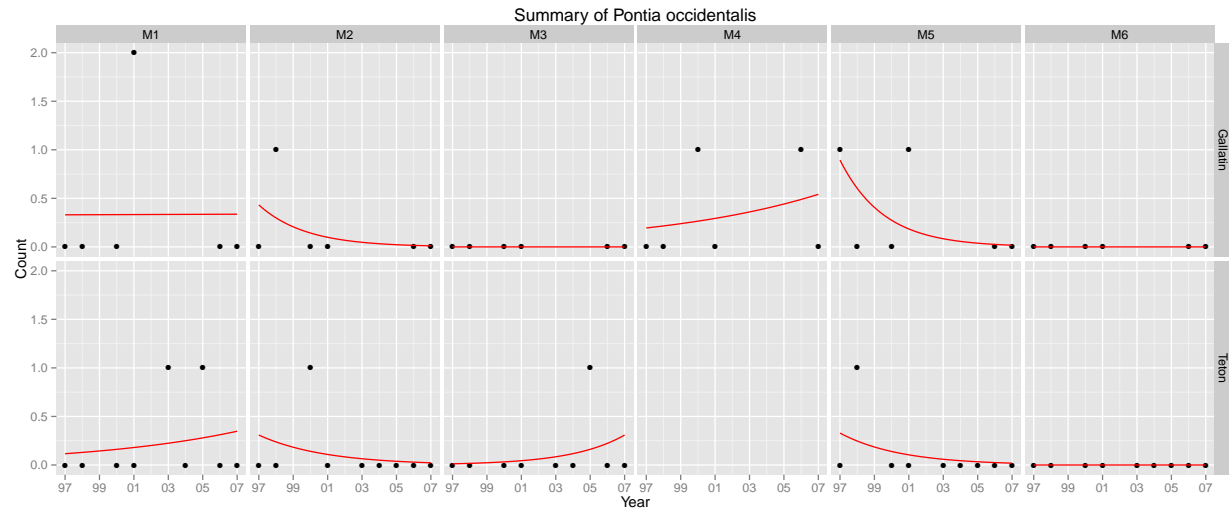

Figure C52: Time series plot of Pontia occidentalis by region and meadow type

## Pontia occidentalis

Table C104: Poisson regression parameter estimates for *Pontia occidentalis*

|                         | Estimate | Std. Error | z value | P-value |
|-------------------------|----------|------------|---------|---------|
| (Intercept)             | -2.1533  | 1.5018     | -1.43   | 0.1516  |
| Year                    | 0.1097   | 0.2047     | 0.54    | 0.5921  |
| MeadowM2                | 0.9769   | 1.8748     | 0.52    | 0.6023  |
| MeadowM3                | -2.2543  | 3.9977     | -0.56   | 0.5728  |
| MeadowM4                | -0.5271  | 1.6904     | -0.31   | 0.7552  |
| MeadowM5                | 1.0406   | 1.8003     | 0.58    | 0.5633  |
| MeadowM6                | -17.4185 | 5249.3337  | -0.00   | 0.9974  |
| RegionGallatin          | 1.0460   | 1.7162     | 0.61    | 0.5422  |
| Year:MeadowM2           | -0.3706  | 0.3325     | -1.11   | 0.2650  |
| Year:MeadowM3           | 0.2134   | 0.4907     | 0.43    | 0.6636  |
| Year:MeadowM4           | 0.1002   | 0.2541     | 0.39    | 0.6934  |
| Year:MeadowM5           | -0.3958  | 0.3046     | -1.30   | 0.1937  |
| Year:MeadowM6           | -0.0603  | 717.9730   | -0.00   | 0.9999  |
| Year:RegionGallatin     | -0.1078  | 0.2397     | -0.45   | 0.6529  |
| MeadowM2:RegionGallatin | -0.7080  | 2.0260     | -0.35   | 0.7267  |
| MeadowM3:RegionGallatin | -17.0441 | 3483.4888  | -0.00   | 0.9961  |
| MeadowM5:RegionGallatin | -0.0450  | 1.8811     | -0.02   | 0.9809  |
| MeadowM6:RegionGallatin | -0.5247  | 5179.4500  | -0.00   | 0.9999  |

53 *Speyeria cybele*

Table C105: Poisson regression fitted models for *Speyeria cybele*

|    | Region   | Meadow | Model                                  | Sig |
|----|----------|--------|----------------------------------------|-----|
| 1  | Teton    | M1     | $\hat{Y} = 3.901e^{-0.078(YEAR-1997)}$ |     |
| 2  | Teton    | M2     | $\hat{Y} = 2.622e^{-0.08(YEAR-1997)}$  |     |
| 3  | Teton    | M3     | $\hat{Y} = 0.194e^{-0.119(YEAR-1997)}$ |     |
| 5  | Teton    | M5     | $\hat{Y} = 0e^{-0.031(YEAR-1997)}$     |     |
| 6  | Teton    | M6     | $\hat{Y} = 0e^{-0.031(YEAR-1997)}$     |     |
| 7  | Gallatin | M1     | $\hat{Y} = 0e^{-0.009(YEAR-1997)}$     |     |
| 8  | Gallatin | M2     | $\hat{Y} = 0e^{-0.011(YEAR-1997)}$     |     |
| 9  | Gallatin | M3     | $\hat{Y} = 0e^{-0.051(YEAR-1997)}$     |     |
| 10 | Gallatin | M4     | $\hat{Y} = 0.008e^{0.425(YEAR-1997)}$  |     |
| 11 | Gallatin | M5     | $\hat{Y} = 0e^{0.037(YEAR-1997)}$      |     |
| 12 | Gallatin | M6     | $\hat{Y} = 0e^{0.037(YEAR-1997)}$      |     |

Null deviance: 216.878 on 80 degrees of freedom  
Residual deviance: 99.723 on 63 degrees of freedom  
(51 observations deleted due to missingness)  
AIC: 163.34

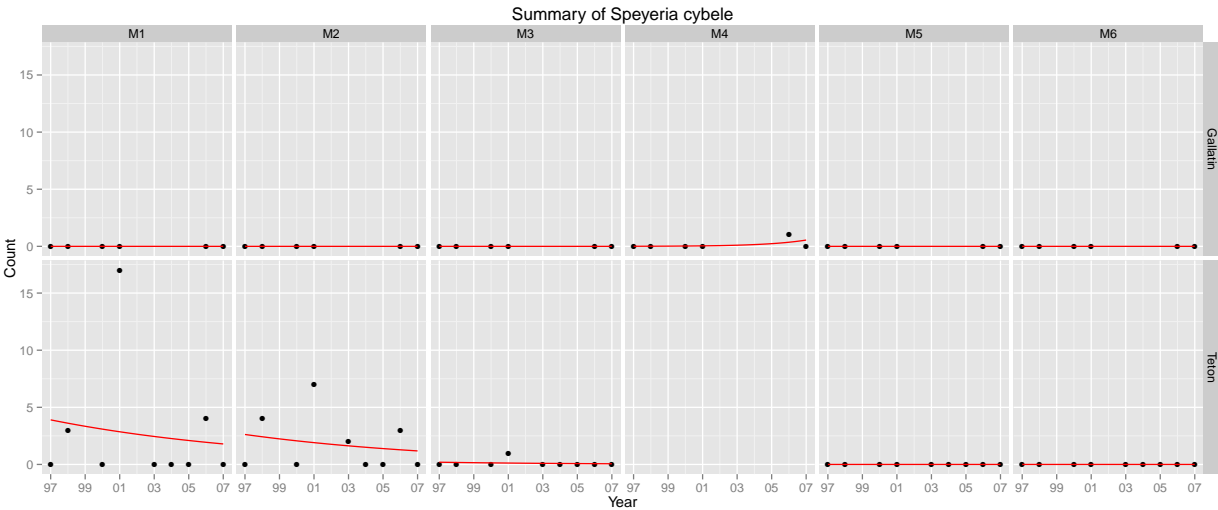

Figure C53: Time series plot of *Speyeria cybele* by region and meadow type

# Speyeria cybele

Table C106: Poisson regression parameter estimates for *Speyeria cybele*

|                         | Estimate | Std. Error | z value | P-value |
|-------------------------|----------|------------|---------|---------|
| (Intercept)             | 1.3613   | 0.3397     | 4.01    | 0.0001  |
| Year                    | -0.0777  | 0.0609     | -1.28   | 0.2019  |
| MeadowM2                | -0.3972  | 0.5362     | -0.74   | 0.4588  |
| MeadowM3                | -3.0033  | 1.6077     | -1.87   | 0.0618  |
| MeadowM4                | 14.4127  | 4440.5050  | 0.00    | 0.9974  |
| MeadowM5                | -20.4938 | 4760.1158  | -0.00   | 0.9966  |
| MeadowM6                | -20.4938 | 4760.1158  | -0.00   | 0.9966  |
| RegionGallatin          | -20.6219 | 4440.5027  | -0.00   | 0.9963  |
| Year:MeadowM2           | -0.0019  | 0.0963     | -0.02   | 0.9846  |
| Year:MeadowM3           | -0.0413  | 0.3091     | -0.13   | 0.8936  |
| Year:MeadowM4           | 0.4342   | 507.7862   | 0.00    | 0.9993  |
| Year:MeadowM5           | 0.0463   | 720.0791   | 0.00    | 0.9999  |
| Year:MeadowM6           | 0.0463   | 720.0791   | 0.00    | 0.9999  |
| Year:RegionGallatin     | 0.0684   | 507.7860   | 0.00    | 0.9999  |
| MeadowM2:RegionGallatin | 0.4046   | 5440.9777  | 0.00    | 0.9999  |
| MeadowM3:RegionGallatin | 3.2089   | 5398.2168  | 0.00    | 0.9995  |
| MeadowM5:RegionGallatin | 20.2895  | 6269.3564  | 0.00    | 0.9974  |
| MeadowM6:RegionGallatin | 20.2895  | 6269.3564  | 0.00    | 0.9974  |

54 *Speyeria hydaspe*

Table C107: Poisson regression fitted models for *Speyeria hydaspe*

|    | Region   | Meadow | Model                                  | Sig |
|----|----------|--------|----------------------------------------|-----|
| 1  | Teton    | M1     | $\hat{Y} = 0.709e^{-0.098(YEAR-1997)}$ |     |
| 2  | Teton    | M2     | $\hat{Y} = 0.29e^{-0.053(YEAR-1997)}$  |     |
| 3  | Teton    | M3     | $\hat{Y} = 0.145e^{-0.053(YEAR-1997)}$ |     |
| 5  | Teton    | M5     | $\hat{Y} = 0.206e^{-0.135(YEAR-1997)}$ |     |
| 6  | Teton    | M6     | $\hat{Y} = 0e^{-0.285(YEAR-1997)}$     |     |
| 7  | Gallatin | M1     | $\hat{Y} = 0.215e^{0.151(YEAR-1997)}$  |     |
| 8  | Gallatin | M2     | $\hat{Y} = 0.104e^{0.196(YEAR-1997)}$  |     |
| 9  | Gallatin | M3     | $\hat{Y} = 0.052e^{0.196(YEAR-1997)}$  |     |
| 10 | Gallatin | M4     | $\hat{Y} = 0e^{0(YEAR-1997)}$          |     |
| 11 | Gallatin | M5     | $\hat{Y} = 0.091e^{0.114(YEAR-1997)}$  |     |
| 12 | Gallatin | M6     | $\hat{Y} = 0.194e^{-0.036(YEAR-1997)}$ |     |

Null deviance: 64.036 on 80 degrees of freedom  
Residual deviance: 49.248 on 63 degrees of freedom  
(51 observations deleted due to missingness)  
AIC: 111.47

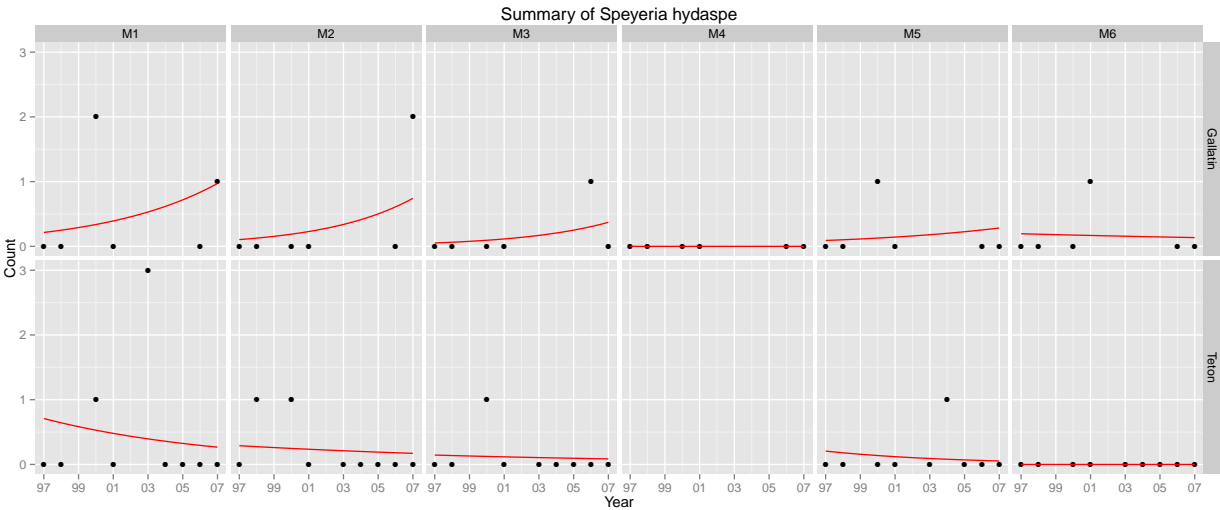

Figure C54: Time series plot of *Speyeria hydaspe* by region and meadow type



# Speyeria hydaspe

Table C108: Poisson regression parameter estimates for Speyeria hydaspe

|                         | Estimate | Std. Error | z value | P-value |
|-------------------------|----------|------------|---------|---------|
| (Intercept)             | -0.3438  | 0.7435     | -0.46   | 0.6438  |
| Year                    | -0.0976  | 0.1299     | -0.75   | 0.4523  |
| MeadowM2                | -0.8957  | 1.2046     | -0.74   | 0.4571  |
| MeadowM3                | -1.5888  | 1.5608     | -1.02   | 0.3087  |
| MeadowM4                | -17.7632 | 5988.0077  | -0.00   | 0.9976  |
| MeadowM5                | -1.2365  | 1.4316     | -0.86   | 0.3877  |
| MeadowM6                | -17.7202 | 2904.4904  | -0.01   | 0.9951  |
| RegionGallatin          | -1.1956  | 1.1567     | -1.03   | 0.3013  |
| Year:MeadowM2           | 0.0451   | 0.1828     | 0.25    | 0.8050  |
| Year:MeadowM3           | 0.0451   | 0.2345     | 0.19    | 0.8474  |
| Year:MeadowM4           | -0.1510  | 1019.4661  | -0.00   | 0.9999  |
| Year:MeadowM5           | -0.0371  | 0.2281     | -0.16   | 0.8706  |
| Year:MeadowM6           | -0.1872  | 0.3048     | -0.61   | 0.5391  |
| Year:RegionGallatin     | 0.2487   | 0.1497     | 1.66    | 0.0968  |
| MeadowM2:RegionGallatin | 0.1754   | 1.3399     | 0.13    | 0.8959  |
| MeadowM3:RegionGallatin | 0.1754   | 1.7122     | 0.10    | 0.9184  |
| MeadowM5:RegionGallatin | 0.3768   | 1.6982     | 0.22    | 0.8244  |
| MeadowM6:RegionGallatin | 17.6214  | 2904.4906  | 0.01    | 0.9952  |

55 Euphydryas gillettii

Table C109: Poisson regression fitted models for Euphydryas gillettii

|    | Region   | Meadow | Model                                 | Sig |
|----|----------|--------|---------------------------------------|-----|
| 1  | Teton    | M1     | $\hat{Y} = 0.209e^{0.126(YEAR-1997)}$ |     |
| 2  | Teton    | M2     | $\hat{Y} = 0.179e^{0.039(YEAR-1997)}$ |     |
| 3  | Teton    | M3     | $\hat{Y} = 0e^{-0.503(YEAR-1997)}$    |     |
| 5  | Teton    | M5     | $\hat{Y} = 0e^{0(YEAR-1997)}$         |     |
| 6  | Teton    | M6     | $\hat{Y} = 0e^{0(YEAR-1997)}$         |     |
| 7  | Gallatin | M1     | $\hat{Y} = 0.331e^{0.129(YEAR-1997)}$ |     |
| 8  | Gallatin | M2     | $\hat{Y} = 1.77e^{0.042(YEAR-1997)}$  |     |
| 9  | Gallatin | M3     | $\hat{Y} = 0.505e^{-0.5(YEAR-1997)}$  |     |
| 10 | Gallatin | M4     | $\hat{Y} = 0e^{0(YEAR-1997)}$         |     |
| 11 | Gallatin | M5     | $\hat{Y} = 0e^{0.003(YEAR-1997)}$     |     |
| 12 | Gallatin | M6     | $\hat{Y} = 0e^{0.003(YEAR-1997)}$     |     |

Null deviance: 94.798 on 80 degrees of freedom  
Residual deviance: 32.463 on 63 degrees of freedom  
(51 observations deleted due to missingness)  
AIC: 99.932

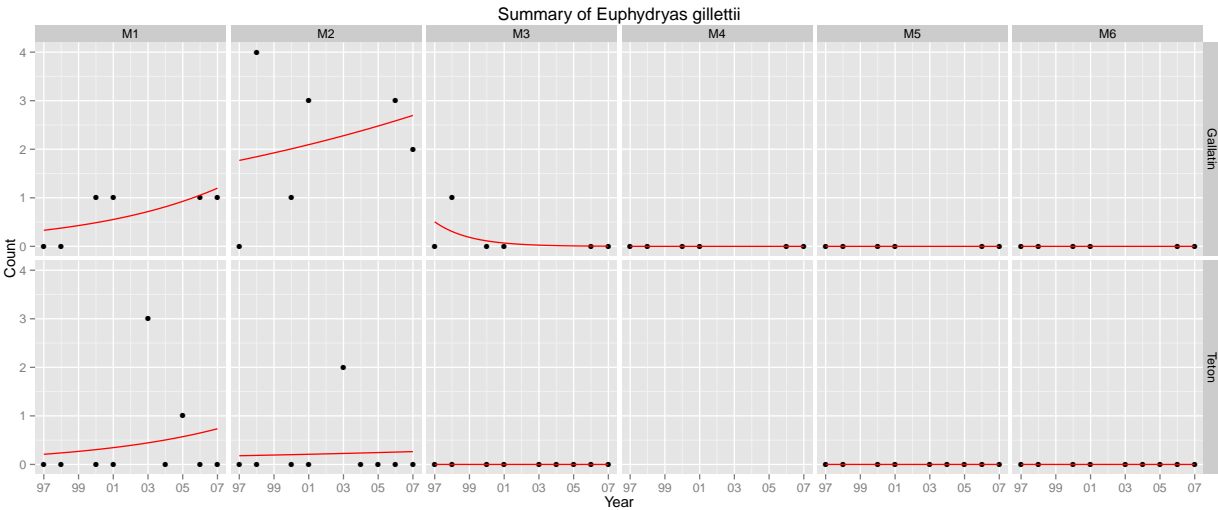

Figure C55: Time series plot of Euphydryas gillettii by region and meadow type

# Euphydryas gillettii

Table C110: Poisson regression parameter estimates for Euphydryas gillettii

|                         | Estimate | Std. Error | z value | P-value |
|-------------------------|----------|------------|---------|---------|
| (Intercept)             | -1.5643  | 1.0554     | -1.48   | 0.1383  |
| Year                    | 0.1256   | 0.1404     | 0.89    | 0.3710  |
| MeadowM2                | -0.1564  | 1.1885     | -0.13   | 0.8953  |
| MeadowM3                | -17.0204 | 4573.7491  | -0.00   | 0.9970  |
| MeadowM4                | -19.1968 | 9872.5556  | -0.00   | 0.9984  |
| MeadowM5                | -18.7073 | 7842.5481  | -0.00   | 0.9981  |
| MeadowM6                | -18.7073 | 7842.5481  | -0.00   | 0.9981  |
| RegionGallatin          | 0.4585   | 1.2376     | 0.37    | 0.7110  |
| Year:MeadowM2           | -0.0866  | 0.1326     | -0.65   | 0.5140  |
| Year:MeadowM3           | -0.6291  | 0.6850     | -0.92   | 0.3584  |
| Year:MeadowM4           | -0.1287  | 1680.8155  | -0.00   | 0.9999  |
| Year:MeadowM5           | -0.1257  | 1116.9675  | -0.00   | 0.9999  |
| Year:MeadowM6           | -0.1257  | 1116.9675  | -0.00   | 0.9999  |
| Year:RegionGallatin     | 0.0031   | 0.1556     | 0.02    | 0.9842  |
| MeadowM2:RegionGallatin | 1.8330   | 1.0470     | 1.75    | 0.0800  |
| MeadowM3:RegionGallatin | 17.4421  | 4573.7492  | 0.00    | 0.9970  |
| MeadowM5:RegionGallatin | -0.4498  | 8061.9500  | -0.00   | 1.0000  |
| MeadowM6:RegionGallatin | -0.4498  | 8061.9500  | -0.00   | 1.0000  |

56 *Colias christina*

Table C111: Poisson regression fitted models for *Colias christina*

|    | Region   | Meadow | Model                                  | Sig |
|----|----------|--------|----------------------------------------|-----|
| 1  | Teton    | M1     | $\hat{Y} = 0e^{-0.096(YEAR-1997)}$     |     |
| 2  | Teton    | M2     | $\hat{Y} = 0.359e^{-0.014(YEAR-1997)}$ |     |
| 3  | Teton    | M3     | $\hat{Y} = 0.104e^{0.012(YEAR-1997)}$  |     |
| 5  | Teton    | M5     | $\hat{Y} = 0e^{-0.244(YEAR-1997)}$     |     |
| 6  | Teton    | M6     | $\hat{Y} = 0e^{-0.226(YEAR-1997)}$     |     |
| 7  | Gallatin | M1     | $\hat{Y} = 0e^{0.112(YEAR-1997)}$      |     |
| 8  | Gallatin | M2     | $\hat{Y} = 0.106e^{0.194(YEAR-1997)}$  |     |
| 9  | Gallatin | M3     | $\hat{Y} = 0.044e^{0.22(YEAR-1997)}$   |     |
| 10 | Gallatin | M4     | $\hat{Y} = 0.699e^{-0.24(YEAR-1997)}$  |     |
| 11 | Gallatin | M5     | $\hat{Y} = 0.389e^{-0.036(YEAR-1997)}$ |     |
| 12 | Gallatin | M6     | $\hat{Y} = 0.721e^{-0.018(YEAR-1997)}$ |     |

Null deviance: 56.137 on 80 degrees of freedom  
Residual deviance: 33.770 on 63 degrees of freedom  
(51 observations deleted due to missingness)  
AIC: 96.997

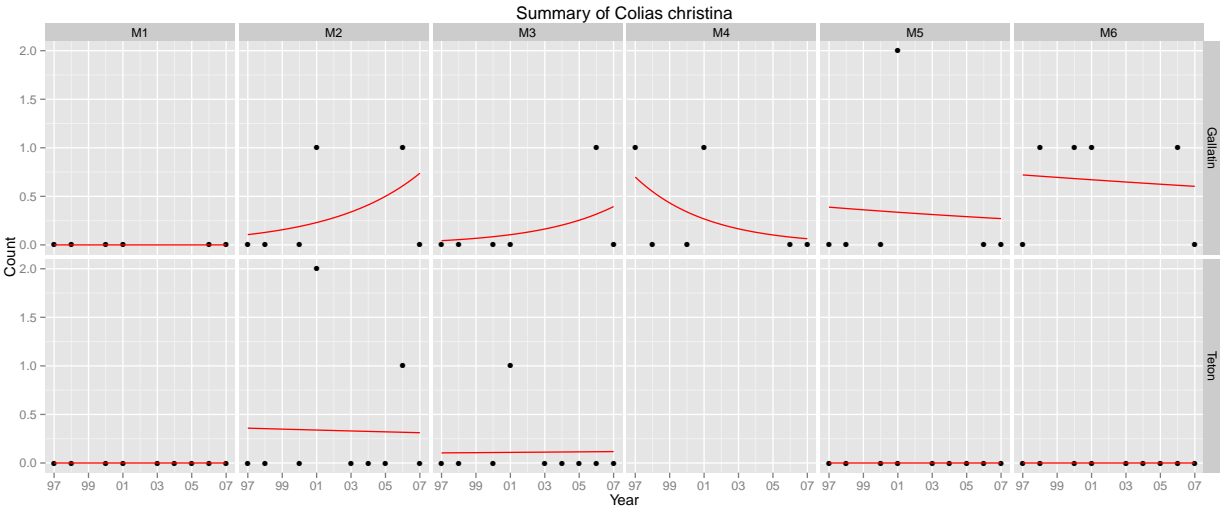

Figure C56: Time series plot of *Colias christina* by region and meadow type

## Colias christina

Table C112: Poisson regression parameter estimates for *Colias christina*

|                         | Estimate | Std. Error | z value | P-value |
|-------------------------|----------|------------|---------|---------|
| (Intercept)             | -19.8117 | 6971.3336  | -0.00   | 0.9977  |
| Year                    | -0.0965  | 1116.9903  | -0.00   | 0.9999  |
| MeadowM2                | 18.7864  | 6971.3337  | 0.00    | 0.9978  |
| MeadowM3                | 17.5489  | 6971.3338  | 0.00    | 0.9980  |
| MeadowM4                | 20.4867  | 9233.8208  | 0.00    | 0.9982  |
| MeadowM5                | 0.5942   | 8524.1021  | 0.00    | 0.9999  |
| MeadowM6                | 0.5481   | 8515.3759  | 0.00    | 0.9999  |
| RegionGallatin          | -1.0336  | 8294.1078  | -0.00   | 0.9999  |
| Year:MeadowM2           | 0.0825   | 1116.9903  | 0.00    | 0.9999  |
| Year:MeadowM3           | 0.1086   | 1116.9903  | 0.00    | 0.9999  |
| Year:MeadowM4           | -0.3516  | 1116.9904  | -0.00   | 0.9997  |
| Year:MeadowM5           | -0.1478  | 1116.9903  | -0.00   | 0.9999  |
| Year:MeadowM6           | -0.1294  | 1116.9903  | -0.00   | 0.9999  |
| Year:RegionGallatin     | 0.2081   | 0.2267     | 0.92    | 0.3587  |
| MeadowM2:RegionGallatin | -0.1864  | 8294.1078  | -0.00   | 1.0000  |
| MeadowM3:RegionGallatin | 0.1652   | 8294.1079  | 0.00    | 1.0000  |
| MeadowM5:RegionGallatin | 19.3060  | 9636.0287  | 0.00    | 0.9984  |
| MeadowM6:RegionGallatin | 19.9695  | 9628.3102  | 0.00    | 0.9983  |

# 57 Pieris napi morph 2

Table C113: Poisson regression fitted models for Pieris napi morph 2

|    | Region   | Meadow | Model                                  | Sig |
|----|----------|--------|----------------------------------------|-----|
| 1  | Teton    | M1     | $\hat{Y} = 0.581e^{-0.119(YEAR-1997)}$ |     |
| 2  | Teton    | M2     | $\hat{Y} = 0.581e^{-0.119(YEAR-1997)}$ |     |
| 3  | Teton    | M3     | $\hat{Y} = 0.194e^{-0.119(YEAR-1997)}$ |     |
| 5  | Teton    | M5     | $\hat{Y} = 0e^{-0.119(YEAR-1997)}$     |     |
| 6  | Teton    | M6     | $\hat{Y} = 0e^{-0.119(YEAR-1997)}$     |     |
| 7  | Gallatin | M1     | $\hat{Y} = 1.166e^{-0.036(YEAR-1997)}$ |     |
| 8  | Gallatin | M2     | $\hat{Y} = 1.36e^{-0.036(YEAR-1997)}$  |     |
| 9  | Gallatin | M3     | $\hat{Y} = 2.138e^{-0.036(YEAR-1997)}$ |     |
| 10 | Gallatin | M4     | $\hat{Y} = 0.194e^{-0.036(YEAR-1997)}$ |     |
| 11 | Gallatin | M5     | $\hat{Y} = 0.194e^{-0.036(YEAR-1997)}$ |     |
| 12 | Gallatin | M6     | $\hat{Y} = 0.194e^{-0.036(YEAR-1997)}$ |     |

Null deviance: 173.71 on 80 degrees of freedom  
Residual deviance: 125.93 on 63 degrees of freedom  
(51 observations deleted due to missingness)  
AIC: 187.63

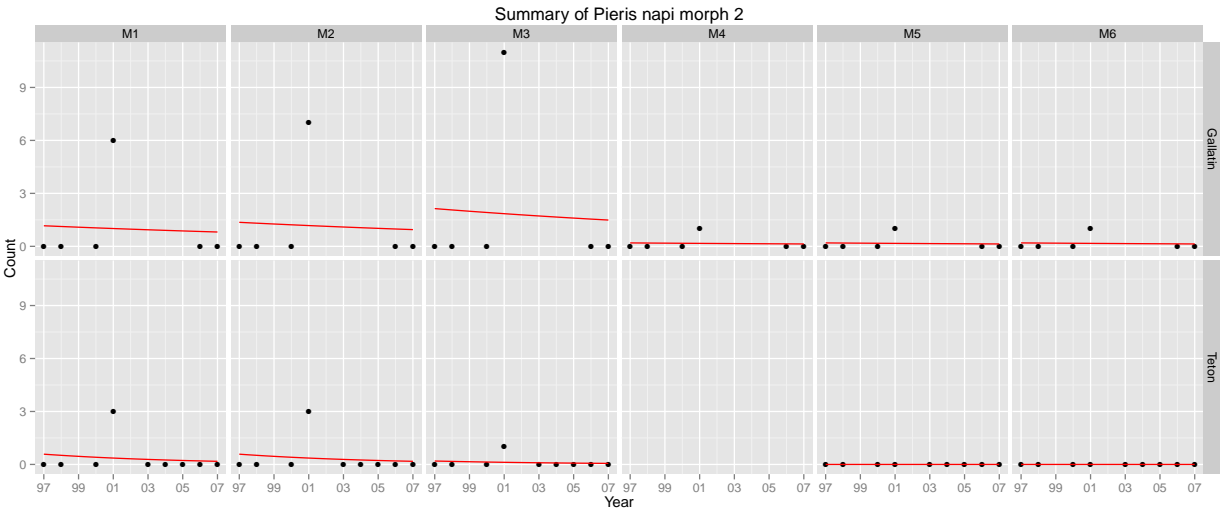

Figure C57: Time series plot of Pieris napi morph 2 by region and meadow type

## Pieris napi morph 2

Table C114: Poisson regression parameter estimates for Pieris napi morph 2

|                         | Estimate | Std. Error | z value | P-value |
|-------------------------|----------|------------|---------|---------|
| (Intercept)             | -0.5433  | 0.7845     | -0.69   | 0.4886  |
| Year                    | -0.1191  | 0.1328     | -0.90   | 0.3700  |
| MeadowM2                | -0.0000  | 0.9673     | -0.00   | 1.0000  |
| MeadowM3                | -1.0986  | 1.2610     | -0.87   | 0.3836  |
| MeadowM4                | -1.7918  | 1.5906     | -1.13   | 0.2600  |
| MeadowM5                | -17.1761 | 1879.4264  | -0.01   | 0.9927  |
| MeadowM6                | -17.1761 | 1879.4264  | -0.01   | 0.9927  |
| RegionGallatin          | 0.6969   | 0.8821     | 0.79    | 0.4295  |
| Year:MeadowM2           | 0.0000   | 0.1297     | 0.00    | 1.0000  |
| Year:MeadowM3           | 0.0000   | 0.1267     | 0.00    | 1.0000  |
| Year:MeadowM4           | -0.0000  | 0.2919     | -0.00   | 1.0000  |
| Year:MeadowM5           | 0.0000   | 0.2919     | 0.00    | 1.0000  |
| Year:MeadowM6           | -0.0000  | 0.2919     | -0.00   | 1.0000  |
| Year:RegionGallatin     | 0.0829   | 0.1318     | 0.63    | 0.5294  |
| MeadowM2:RegionGallatin | 0.1542   | 0.9880     | 0.16    | 0.8760  |
| MeadowM3:RegionGallatin | 1.7047   | 1.2613     | 1.35    | 0.1765  |
| MeadowM5:RegionGallatin | 15.3843  | 1879.4264  | 0.01    | 0.9935  |
| MeadowM6:RegionGallatin | 15.3843  | 1879.4264  | 0.01    | 0.9935  |

## 58 *Lycaena nivalis*

Table C115: Poisson regression fitted models for *Lycaena nivalis*

|    | Region   | Meadow | Model                                  | Sig |
|----|----------|--------|----------------------------------------|-----|
| 1  | Teton    | M1     | $\hat{Y} = 0e^{0.008(YEAR-1997)}$      |     |
| 2  | Teton    | M2     | $\hat{Y} = 0.581e^{-0.119(YEAR-1997)}$ |     |
| 3  | Teton    | M3     | $\hat{Y} = 1.288e^{-0.029(YEAR-1997)}$ |     |
| 5  | Teton    | M5     | $\hat{Y} = 3.836e^{-0.009(YEAR-1997)}$ |     |
| 6  | Teton    | M6     | $\hat{Y} = 1.812e^{0.053(YEAR-1997)}$  |     |
| 7  | Gallatin | M1     | $\hat{Y} = 0e^{-0.009(YEAR-1997)}$     |     |
| 8  | Gallatin | M2     | $\hat{Y} = 0e^{-0.137(YEAR-1997)}$     |     |
| 9  | Gallatin | M3     | $\hat{Y} = 0.202e^{-0.046(YEAR-1997)}$ |     |
| 10 | Gallatin | M4     | $\hat{Y} = 0.972e^{-0.036(YEAR-1997)}$ |     |
| 11 | Gallatin | M5     | $\hat{Y} = 0.187e^{-0.026(YEAR-1997)}$ |     |
| 12 | Gallatin | M6     | $\hat{Y} = 0e^{0.035(YEAR-1997)}$      |     |

Null deviance: 212.26 on 80 degrees of freedom  
Residual deviance: 87.72 on 63 degrees of freedom  
(51 observations deleted due to missingness)  
AIC: 190.85

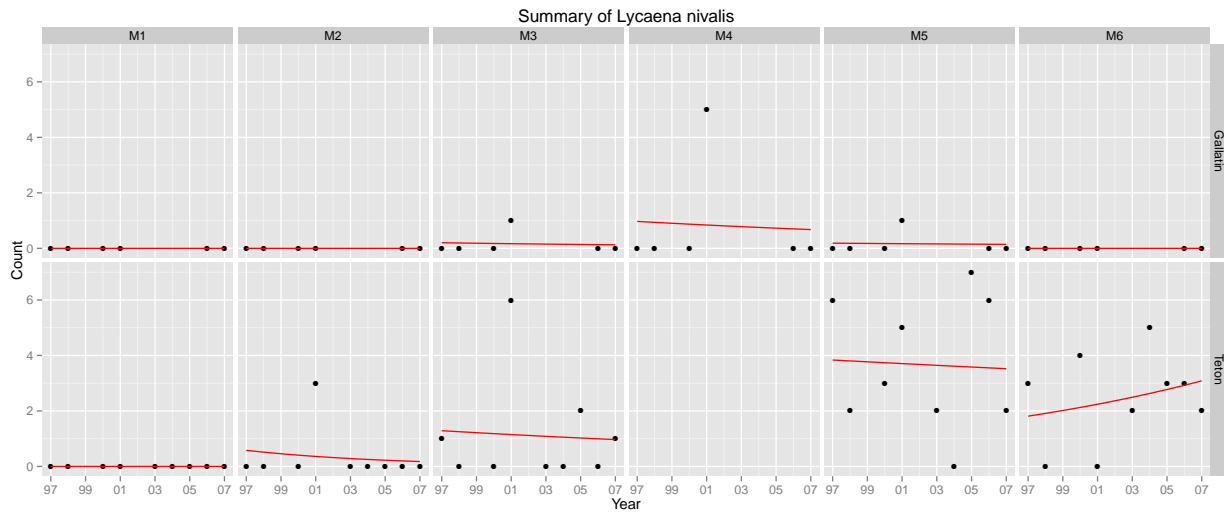

Figure C58: Time series plot of *Lycaena nivalis* by region and meadow type



# Lycaena nivalis

Table C116: Poisson regression parameter estimates for *Lycaena nivalis*

|                         | Estimate | Std. Error | z value | P-value |
|-------------------------|----------|------------|---------|---------|
| (Intercept)             | -19.3446 | 4903.3686  | -0.00   | 0.9969  |
| Year                    | 0.0083   | 694.4784   | 0.00    | 1.0000  |
| MeadowM2                | 18.8013  | 4903.3687  | 0.00    | 0.9969  |
| MeadowM3                | 19.5977  | 4903.3687  | 0.00    | 0.9968  |
| MeadowM4                | 19.2276  | 4892.9002  | 0.00    | 0.9969  |
| MeadowM5                | 20.6889  | 4903.3686  | 0.00    | 0.9966  |
| MeadowM6                | 19.9393  | 4903.3687  | 0.00    | 0.9968  |
| RegionGallatin          | 0.0883   | 5013.5831  | 0.00    | 1.0000  |
| Year:MeadowM2           | -0.1273  | 694.4784   | -0.00   | 0.9999  |
| Year:MeadowM3           | -0.0368  | 694.4784   | -0.00   | 1.0000  |
| Year:MeadowM4           | -0.0267  | 694.4784   | -0.00   | 1.0000  |
| Year:MeadowM5           | -0.0168  | 694.4784   | -0.00   | 1.0000  |
| Year:MeadowM6           | 0.0449   | 694.4784   | 0.00    | 0.9999  |
| Year:RegionGallatin     | -0.0177  | 0.2006     | -0.09   | 0.9296  |
| MeadowM2:RegionGallatin | -18.1185 | 6070.0221  | -0.00   | 0.9976  |
| MeadowM3:RegionGallatin | -1.9397  | 5013.5831  | -0.00   | 0.9997  |
| MeadowM5:RegionGallatin | -3.1111  | 5013.5831  | -0.00   | 0.9995  |
| MeadowM6:RegionGallatin | -20.1432 | 6307.4825  | -0.00   | 0.9975  |

59 Boloria selene

Table C117: Poisson regression fitted models for Boloria selene

|    | Region   | Meadow | Model                                   | Sig |
|----|----------|--------|-----------------------------------------|-----|
| 1  | Teton    | M1     | $\hat{Y} = 12.881e^{-0.029(YEAR-1997)}$ |     |
| 2  | Teton    | M2     | $\hat{Y} = 7.858e^{-0.01(YEAR-1997)}$   |     |
| 3  | Teton    | M3     | $\hat{Y} = 0e^{0.025(YEAR-1997)}$       |     |
| 5  | Teton    | M5     | $\hat{Y} = 0e^{0.007(YEAR-1997)}$       |     |
| 6  | Teton    | M6     | $\hat{Y} = 0e^{0.007(YEAR-1997)}$       |     |
| 7  | Gallatin | M1     | $\hat{Y} = 0.796e^{-0.042(YEAR-1997)}$  | *** |
| 8  | Gallatin | M2     | $\hat{Y} = 5.914e^{-0.024(YEAR-1997)}$  | *** |
| 9  | Gallatin | M3     | $\hat{Y} = 0.474e^{0.012(YEAR-1997)}$   | *** |
| 10 | Gallatin | M4     | $\hat{Y} = 0e^{0(YEAR-1997)}$           | *** |
| 11 | Gallatin | M5     | $\hat{Y} = 0e^{-0.007(YEAR-1997)}$      | *** |
| 12 | Gallatin | M6     | $\hat{Y} = 0e^{-0.007(YEAR-1997)}$      | *** |

Null deviance: 569.32 on 80 degrees of freedom  
Residual deviance: 102.22 on 63 degrees of freedom  
(51 observations deleted due to missingness)  
AIC: 233.16

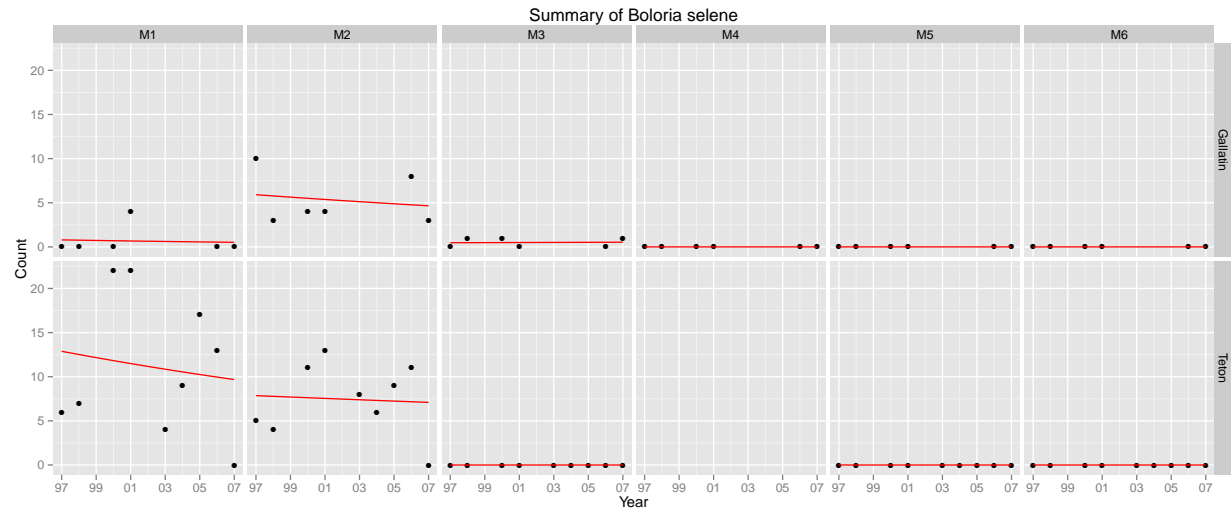

Figure C59: Time series plot of Boloria selene by region and meadow type

## Boloria selene

Table C118: Poisson regression parameter estimates for Boloria selene

|                         | Estimate | Std. Error | z value | P-value |
|-------------------------|----------|------------|---------|---------|
| (Intercept)             | 2.5558   | 0.1773     | 14.41   | 0.0000  |
| Year                    | -0.0286  | 0.0292     | -0.98   | 0.3280  |
| MeadowM2                | -0.4942  | 0.2793     | -1.77   | 0.0768  |
| MeadowM3                | -21.9754 | 3109.3473  | -0.01   | 0.9944  |
| MeadowM4                | -19.0746 | 5988.0077  | -0.00   | 0.9975  |
| MeadowM5                | -21.8874 | 4878.8899  | -0.00   | 0.9964  |
| MeadowM6                | -21.8874 | 4878.8899  | -0.00   | 0.9964  |
| RegionGallatin          | -2.7838  | 0.5561     | -5.01   | 0.0000  |
| Year:MeadowM2           | 0.0183   | 0.0448     | 0.41    | 0.6828  |
| Year:MeadowM3           | 0.0538   | 0.1634     | 0.33    | 0.7419  |
| Year:MeadowM4           | 0.0422   | 1019.4661  | 0.00    | 1.0000  |
| Year:MeadowM5           | 0.0351   | 691.8904   | 0.00    | 1.0000  |
| Year:MeadowM6           | 0.0351   | 691.8904   | 0.00    | 1.0000  |
| Year:RegionGallatin     | -0.0136  | 0.0553     | -0.25   | 0.8055  |
| MeadowM2:RegionGallatin | 2.4996   | 0.5560     | 4.50    | 0.0000  |
| MeadowM3:RegionGallatin | 21.4570  | 3109.3473  | 0.01    | 0.9945  |
| MeadowM5:RegionGallatin | 2.8550   | 4994.9315  | 0.00    | 0.9995  |
| MeadowM6:RegionGallatin | 2.8550   | 4994.9315  | 0.00    | 0.9995  |

60    *Phyciodes tharos*

Table C119: Poisson regression fitted models for *Phyciodes tharos*

|    | Region   | Meadow | Model                                  | Sig |
|----|----------|--------|----------------------------------------|-----|
| 1  | Teton    | M1     | $\hat{Y} = 0.41e^{-0.133(YEAR-1997)}$  |     |
| 2  | Teton    | M2     | $\hat{Y} = 0.22e^{0.002(YEAR-1997)}$   |     |
| 3  | Teton    | M3     | $\hat{Y} = 0.097e^{0.024(YEAR-1997)}$  |     |
| 5  | Teton    | M5     | $\hat{Y} = 0e^{0.009(YEAR-1997)}$      |     |
| 6  | Teton    | M6     | $\hat{Y} = 0e^{-0.078(YEAR-1997)}$     |     |
| 7  | Gallatin | M1     | $\hat{Y} = 0.238e^{-0.091(YEAR-1997)}$ |     |
| 8  | Gallatin | M2     | $\hat{Y} = 0.27e^{0.044(YEAR-1997)}$   |     |
| 9  | Gallatin | M3     | $\hat{Y} = 0.36e^{0.066(YEAR-1997)}$   |     |
| 10 | Gallatin | M4     | $\hat{Y} = 0e^{0(YEAR-1997)}$          |     |
| 11 | Gallatin | M5     | $\hat{Y} = 0.519e^{0.051(YEAR-1997)}$  |     |
| 12 | Gallatin | M6     | $\hat{Y} = 0.583e^{-0.036(YEAR-1997)}$ |     |

Null deviance: 72.875 on 80 degrees of freedom  
Residual deviance: 53.731 on 63 degrees of freedom  
(51 observations deleted due to missingness)  
AIC: 116.94

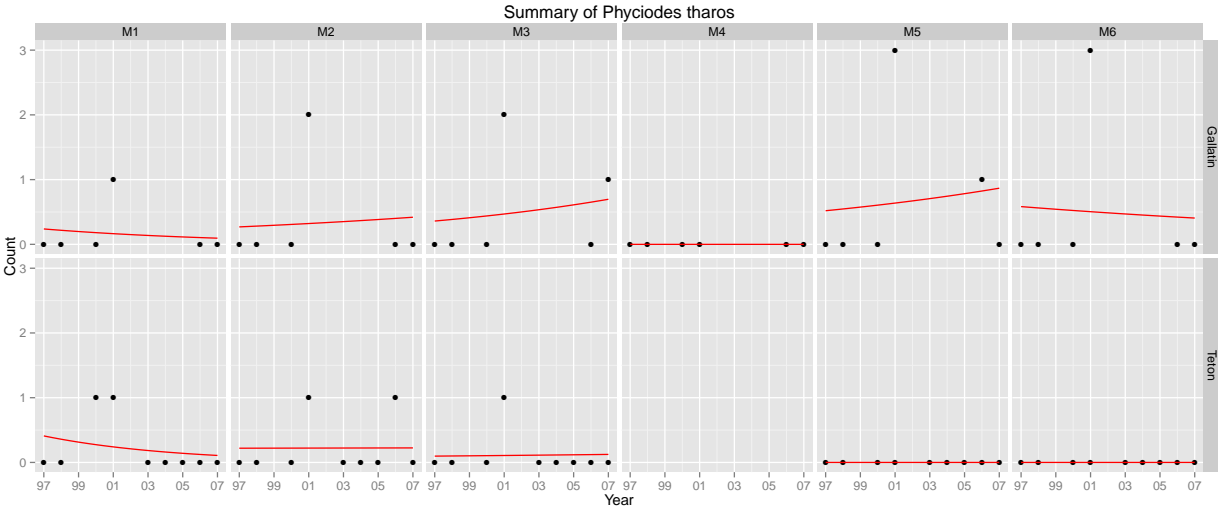

Figure C60: Time series plot of *Phyciodes tharos* by region and meadow type

# Phyciodes tharos

Table C120: Poisson regression parameter estimates for Phyciodes tharos

|                         | Estimate | Std. Error | z value | P-value |
|-------------------------|----------|------------|---------|---------|
| (Intercept)             | -0.8923  | 1.0057     | -0.89   | 0.3749  |
| Year                    | -0.1334  | 0.1860     | -0.72   | 0.4732  |
| MeadowM2                | -0.6231  | 1.4509     | -0.43   | 0.6676  |
| MeadowM3                | -1.4359  | 1.6908     | -0.85   | 0.3957  |
| MeadowM4                | -17.8661 | 5988.0078  | -0.00   | 0.9976  |
| MeadowM5                | -18.4280 | 3091.7226  | -0.01   | 0.9952  |
| MeadowM6                | -17.9987 | 3096.7112  | -0.01   | 0.9954  |
| RegionGallatin          | -0.5441  | 1.3899     | -0.39   | 0.6954  |
| Year:MeadowM2           | 0.1356   | 0.2267     | 0.60    | 0.5499  |
| Year:MeadowM3           | 0.1574   | 0.2357     | 0.67    | 0.5043  |
| Year:MeadowM4           | 0.0915   | 1019.4661  | 0.00    | 0.9999  |
| Year:MeadowM5           | 0.1428   | 0.2487     | 0.57    | 0.5660  |
| Year:MeadowM6           | 0.0553   | 0.2645     | 0.21    | 0.8344  |
| Year:RegionGallatin     | 0.0420   | 0.1860     | 0.23    | 0.8215  |
| MeadowM2:RegionGallatin | 0.7485   | 1.6179     | 0.46    | 0.6437  |
| MeadowM3:RegionGallatin | 1.8508   | 1.7295     | 1.07    | 0.2845  |
| MeadowM5:RegionGallatin | 19.2092  | 3091.7226  | 0.01    | 0.9950  |
| MeadowM6:RegionGallatin | 18.8956  | 3096.7112  | 0.01    | 0.9951  |
